# Supplementary material
Source: PubMed Central journal article supplement (PMC3754054)
Supplement: JVI.00631-13_zjv999097980so1.pdf [file JVI.00631-13_zjv999097980so1.pdf]

**A**

Lymph node

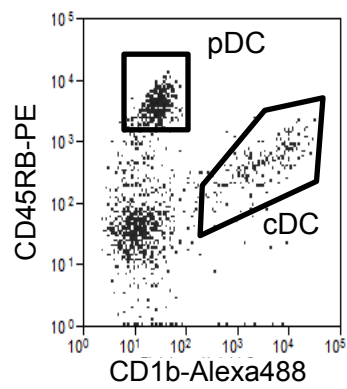

FLT3

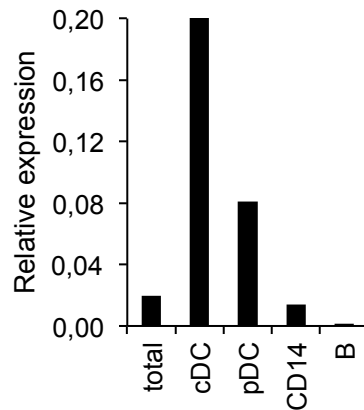

XCR1

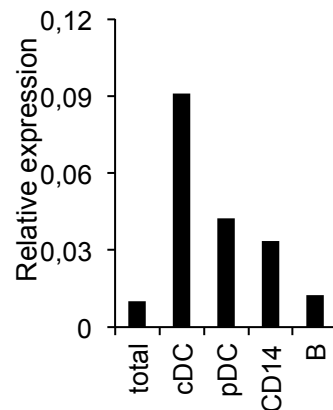

TCF4

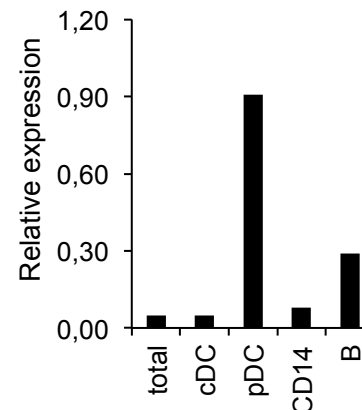**B**

Blood

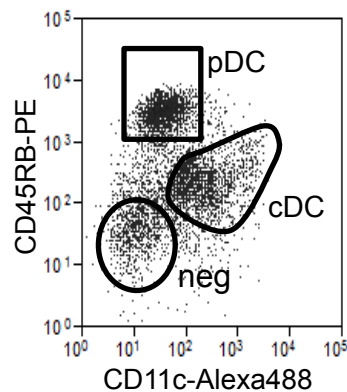

FLT3

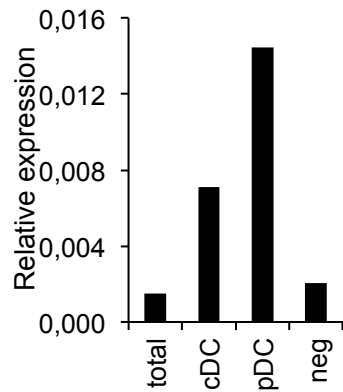

XCR1

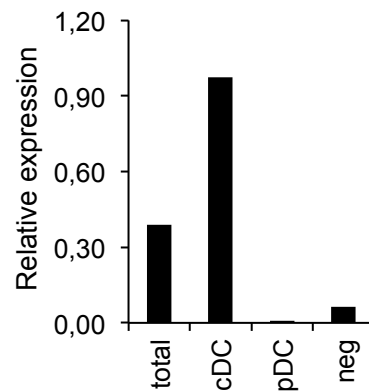

TCF4

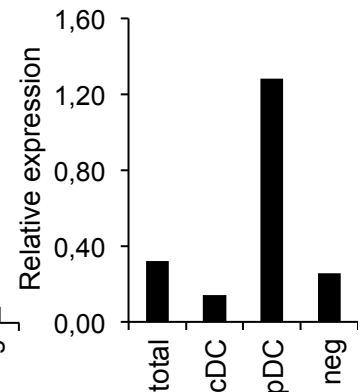

XCL1

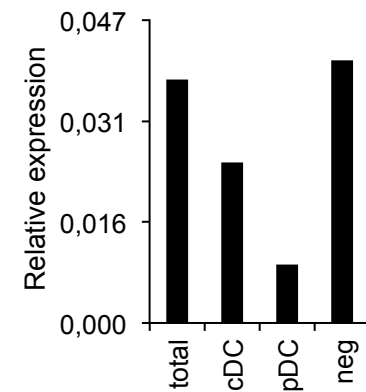

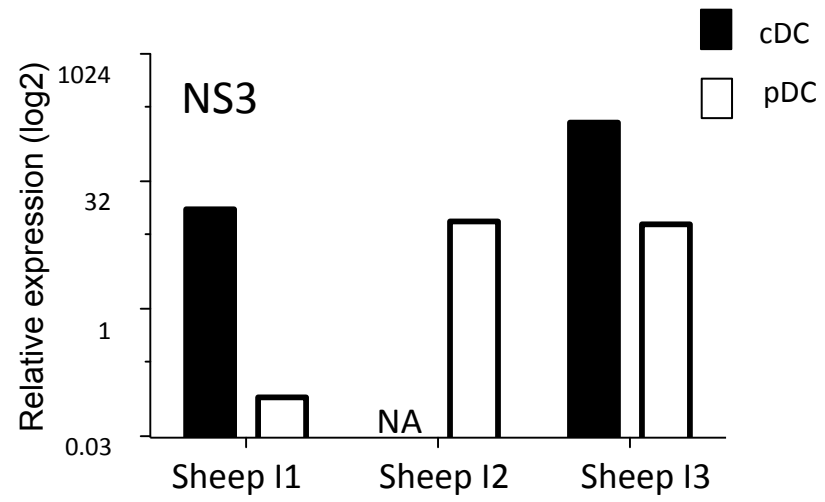

Figure S2

## Supplementary legends

### **Figure S1. Characterization of sheep cDCs and pDCs in lymphoid organs. A.**

Lymph node: LD local lymph node cells were stained with anti CD45RB, CD1b, CD8, TCR $\gamma/\delta$ , B, and CD11b mAbs followed by anti-mouse IgG Alexa Fluor 488-conjugated goat Fab or by anti-mouse isotype-specific PE- and Alexa Fluor 647-conjugated goat IgG (see materials and methods). On the resulting gate generated on FSC<sup>hi</sup> cells and from excluded CD8<sup>+</sup>TCR $\gamma/\delta$ <sup>+</sup>B<sup>+</sup>CD11b<sup>+</sup> LD cells, the pDC and cDC gates were established based on isotype controls. Blood B cells and monocytes were sorted using the DU2-104 and anti-CD14 mAbs (not shown). A qPCR was performed on the sorted subsets and total LD cells using ovine specific primers for the GAPDH, FLT3, XCR1, TCF4 and XCL1 mRNA detection. DC canonic gene expressions were assessed by qRT-PCR relatively to GAPDH and arbitrary units were calculated by the  $2^{-\Delta CT}$  method. **B.** Blood: LD blood cells were labeled as in A except that the anti-CD11c replaced the anti-CD1b mAb. The CD11c<sup>-</sup>CD45RB<sup>-</sup> cells (neg cells) were used as controls and may include activated CD8<sup>+</sup> T cells and/or NK cells, as attested by their high XCL1 expression. Similar results were found with spleen and blood DCs. Sorting and qPCR analyses of canonic DC gene expression on lymph nodes, spleen and blood were done with 2 different sheep and gave similar results.

### **Figure S2. Viral BTV RNA detection in lymph node cDCs and pDCs.**

Total RNA extracted from the pDCs of three BTV- infected sheep (sheep I1, I2, I3) and from the cDCs of two BTV- infected sheep (sheep I1 and sheep I3) was processed for BTV RNA detection by qRT-PCR and normalized with GAPDH (ADIAVET<sup>®</sup> BTV Real-time

A352). Arbitrary units were calculated by the  $2^{-\Delta CT}$  method. NA: total RNA from lymph

node cDC not available for sheep I2

**Table S1. DEG in blood pDCs upon BTV infection\***

| Official gene symbol | Approved name                                                                                 | Control sheep 1 (log2) | Control sheep 3 (log2) | Infected sheep 1 (log2) | Infected sheep 2 (log2) | Minimal fold change (log2) | Minimal fold change |
|----------------------|-----------------------------------------------------------------------------------------------|------------------------|------------------------|-------------------------|-------------------------|----------------------------|---------------------|
| AHNAK                | AHNAK NUCLEOPROTEIN                                                                           | 6.77                   | 6.84                   | 4.70                    | 5.28                    | -1.49                      | 0.35                |
| AIF1                 | ALLOGRAFT INFLAMMATORY FACTOR 1                                                               | 0.26                   | 0.34                   | 2.46                    | 2.49                    | 2.12                       | 4.36                |
| ALOX5AP              | ARACHIDONATE 5-LIPOXYGENASE-ACTIVATING PROTEIN                                                | -0.71                  | -1.07                  | 1.12                    | 1.11                    | 1.81                       | 3.51                |
| ANG                  | ANGIOGENIN, RIBONUCLEASE, RNASE A FAMILY, 5                                                   | 1.37                   | 0.02                   | 3.34                    | 3.85                    | 1.97                       | 3.92                |
| ANXA2                | ANNEXIN A2 PSEUDOGENE 3; ANNEXIN A2; ANNEXIN A2 PSEUDOGENE 1                                  | 6.21                   | 6.28                   | 4.51                    | 4.80                    | -1.41                      | 0.38                |
| APEX2                | APEX NUCLEASE (APURINIC/APYRIMIDINIC ENDONUCLEASE) 2                                          | 5.36                   | 4.99                   | 3.48                    | 3.95                    | -1.04                      | 0.49                |
| APP                  | AMYLOID BETA (A4) PRECURSOR PROTEIN                                                           | -0.86                  | -1.40                  | 0.25                    | 0.32                    | 1.11                       | 2.16                |
| ASPM                 | ASP (ABNORMAL SPINDLE) HOMOLOG, MICROCEPHALY ASSOCIATED                                       | 2.10                   | 1.88                   | 0.11                    | 0.84                    | -1.04                      | 0.49                |
| ATF3                 | ACTIVATING TRANSCRIPTION FACTOR 3                                                             | -1.50                  | -1.22                  | -0.03                   | 0.52                    | 1.19                       | 2.28                |
| BAG3                 | BCL2-ASSOCIATED ATHANOGENE 3                                                                  | -1.12                  | -1.00                  | 0.13                    | 0.34                    | 1.13                       | 2.18                |
| BHLHE40              | BASIC HELIX-LOOP-HELIX FAMILY, MEMBER E40                                                     | 3.74                   | 4.51                   | 2.10                    | 2.20                    | -1.54                      | 0.34                |
| BIN1                 | BRIDGING INTEGRATOR 1                                                                         | 2.63                   | 2.83                   | 1.47                    | 1.60                    | -1.04                      | 0.49                |
| BMP2K                | BMP2 INDUCIBLE KINASE                                                                         | 0.91                   | 1.30                   | -0.12                   | -0.11                   | -1.02                      | 0.49                |
| BRK1                 | BRICK1, SCAR/WAVE ACTIN-NUCLEATING COMPLEX SUBUNIT                                            | 2.54                   | 2.93                   | 0.76                    | 1.45                    | -1.08                      | 0.47                |
| BTK                  | BRUTON AGAMMAGLOBULINEMIA TYROSINE KINASE                                                     | 3.77                   | 3.87                   | 2.12                    | 2.31                    | -1.46                      | 0.36                |
| C12orf11             | CHROMOSOME 12 OPEN READING FRAME 11                                                           | 1.55                   | 1.59                   | 0.25                    | 0.50                    | -1.06                      | 0.48                |
| C12orf65             | CHROMOSOME 12 OPEN READING FRAME 65                                                           | 3.20                   | 3.34                   | 1.22                    | 1.97                    | -1.23                      | 0.43                |
| C15orf38             | CHROMOSOME 15 OPEN READING FRAME 38                                                           | 1.13                   | 1.82                   | -0.89                   | -1.02                   | -2.02                      | 0.25                |
| C15orf48             | CHROMOSOME 15 OPEN READING FRAME 48                                                           | 0.21                   | 0.11                   | 1.77                    | 1.34                    | 1.12                       | 2.18                |
| C15orf57             | CHROMOSOME 15 OPEN READING FRAME 57                                                           | 4.27                   | 4.37                   | 2.94                    | 3.21                    | -1.06                      | 0.48                |
| C18orf22             | CHROMOSOME 18 OPEN READING FRAME 22                                                           | 3.89                   | 3.82                   | 2.33                    | 2.75                    | -1.07                      | 0.48                |
| C1orf116             | CHROMOSOME 1 OPEN READING FRAME 116                                                           | -1.39                  | -1.19                  | 1.90                    | 2.65                    | 3.09                       | 8.49                |
| C3                   | SIMILAR TO COMPLEMENT C3 PRECURSOR; COMPLEMENT COMPONENT 3; HYPOTHETICAL PROTEIN LOC100133511 | -0.68                  | -0.52                  | 0.66                    | 1.21                    | 1.18                       | 2.26                |
| C4orf47              | CHROMOSOME 4 OPEN READING FRAME 47                                                            | 1.82                   | 1.98                   | 0.70                    | 0.45                    | -1.12                      | 0.46                |
| C5AR1                | COMPLEMENT COMPONENT 5A RECEPTOR 1                                                            | -1.09                  | -1.14                  | 0.08                    | 0.12                    | 1.17                       | 2.25                |
| C5orf62              | MSTP150                                                                                       | -1.89                  | -1.73                  | -0.68                   | -0.57                   | 1.05                       | 2.07                |
| CCL2                 | CHEMOKINE (C-C MOTIF) LIGAND 2                                                                | -0.76                  | -0.35                  | 2.96                    | 1.01                    | 1.36                       | 2.56                |
| CCL4                 | CHEMOKINE (C-C MOTIF) LIGAND 4                                                                | -0.10                  | 0.19                   | 2.04                    | 2.33                    | 1.85                       | 3.61                |
| CCR7                 | CHEMOKINE (C-C MOTIF) RECEPTOR 7                                                              | -1.59                  | -1.38                  | 0.17                    | 0.24                    | 1.55                       | 2.93                |
| CD109                | CD109 MOLECULE                                                                                | 1.35                   | 2.03                   | -0.90                   | -0.18                   | -1.54                      | 0.34                |
| CD14                 | CD14 MOLECULE                                                                                 | 1.10                   | 1.01                   | 2.94                    | 2.90                    | 1.80                       | 3.47                |
| CD4                  | CD4 MOLECULE                                                                                  | -1.10                  | -1.33                  | 0.06                    | 0.62                    | 1.16                       | 2.24                |
| CD5                  | CD5 MOLECULE                                                                                  | 2.23                   | 1.76                   | 3.59                    | 4.14                    | 1.36                       | 2.57                |
| CD83                 | CD83 MOLECULE                                                                                 | 0.33                   | 0.78                   | 2.71                    | 2.40                    | 1.62                       | 3.07                |
| CDC25B               | CELL DIVISION CYCLE 25 HOMOLOG B                                                              | 2.65                   | 2.64                   | 1.21                    | 1.54                    | -1.10                      | 0.47                |
| CDC42                | CELL DIVISION CYCLE 42 (GTP BINDING PROTEIN, 25kDA); CELL DIVISION CYCLE 42 PSEUDOGENE 2      | 1.99                   | 2.42                   | -0.35                   | -0.21                   | -2.20                      | 0.22                |
| CDH1                 | CADHERIN 1, TYPE 1, E-CADHERIN                                                                | 2.05                   | 2.42                   | 0.40                    | 0.94                    | -1.11                      | 0.46                |
| CDH4                 | CADHERIN 4, TYPE 1, R-CADHERIN                                                                | -1.14                  | -1.38                  | 0.24                    | 0.86                    | 1.38                       | 2.61                |
| CDKN1C               | CYCLIN-DEPENDENT KINASE INHIBITOR 1C (P57, KIP2)                                              | 2.42                   | 1.30                   | 4.91                    | 5.53                    | 2.49                       | 5.61                |
| CEBPD                | CCAAT/ENHANCER BINDING PROTEIN (C/EBP), DELTA                                                 | 1.11                   | 0.30                   | 2.63                    | 2.86                    | 1.53                       | 2.88                |

|         |                                                                                 |       |       |       |       |       |      |
|---------|---------------------------------------------------------------------------------|-------|-------|-------|-------|-------|------|
| CENPC1  | CENTROMERE PROTEIN C 1                                                          | 1.41  | 1.64  | 0.11  | 0.33  | -1.09 | 0.47 |
| CFB     | COMPLEMENT FACTOR B                                                             | -1.37 | -1.31 | 0.02  | 0.43  | 1.32  | 2.50 |
| CFP     | COMPLEMENT FACTOR PROPERDIN                                                     | -0.53 | -0.48 | 2.21  | 1.43  | 1.91  | 3.75 |
| CHST2   | CARBOHYDRATE (N-ACETYLGLUCOSAMINE-6-O) SULFOTRANSFERASE 2                       | 5.38  | 5.36  | 2.31  | 3.20  | -2.16 | 0.22 |
| CISH    | CYTOKINE INDUCIBLE SH2-CONTAINING PROTEIN                                       | -0.72 | -0.93 | 0.58  | 0.84  | 1.30  | 2.47 |
| CKAP2L  | CYTOSKELETON ASSOCIATED PROTEIN 2-LIKE                                          | 1.18  | 0.78  | -0.30 | -0.25 | -1.02 | 0.49 |
| CKAP4   | CYTOSKELETON-ASSOCIATED PROTEIN 4                                               | 4.79  | 4.99  | 3.05  | 3.60  | -1.19 | 0.44 |
| CLDND1  | CLAUDIN DOMAIN CONTAINING 1                                                     | 3.65  | 4.00  | 2.28  | 2.59  | -1.06 | 0.48 |
| CLEC6A  | C-TYPE LECTIN DOMAIN FAMILY 6, MEMBER A                                         | -1.34 | -1.22 | 0.44  | -0.18 | 1.04  | 2.05 |
| COX7A1  | CYTOCHROME C OXIDASE SUBUNIT VIIA POLYPEPTIDE 1                                 | 1.96  | 1.39  | 3.37  | 4.22  | 1.41  | 2.65 |
| CRIP1   | CYSTEINE-RICH PROTEIN 1                                                         | 9.97  | 10.03 | 8.17  | 8.80  | -1.17 | 0.44 |
| CRIP2   | CYSTEINE-RICH PROTEIN 2                                                         | 6.50  | 6.61  | 4.01  | 4.93  | -1.57 | 0.34 |
| CSF2RA  | COLONY STIMULATING FACTOR 2 RECEPTOR, ALPHA, LOW-AFFINITY                       | 0.35  | -1.15 | 1.40  | 1.36  | 1.02  | 2.02 |
| CTBP2   | C-TERMINAL BINDING PROTEIN 2                                                    | -0.97 | -1.18 | 0.19  | 0.21  | 1.16  | 2.23 |
| CTLA4   | CYTOTOXIC T-LYMPHOCYTE-ASSOCIATED PROTEIN 4                                     | 0.38  | -0.63 | 2.43  | 3.30  | 2.05  | 4.13 |
| CTSB    | CATHEPSIN B                                                                     | 0.50  | -0.44 | 1.63  | 2.33  | 1.13  | 2.19 |
| CXCL10  | CHEMOKINE (C-X-C MOTIF) LIGAND 10                                               | -0.99 | 0.24  | 2.49  | 3.34  | 2.25  | 4.76 |
| CXCR6   | CHEMOKINE (C-X-C MOTIF) RECEPTOR 6                                              | 0.38  | 0.52  | 1.76  | 2.33  | 1.25  | 2.38 |
| CXCR7   | CHEMOKINE (C-X-C MOTIF) RECEPTOR 7                                              | -1.49 | -1.24 | 0.08  | 0.34  | 1.32  | 2.50 |
| DAPP1   | DUAL ADAPTOR OF PHOSPHOTYROSINE AND 3-PHOSPHOINOSITIDES                         | 3.06  | 3.57  | 1.71  | 1.88  | -1.18 | 0.44 |
| DCK     | DEOXYCYTIDINE KINASE                                                            | 1.83  | 1.95  | 0.42  | 0.59  | -1.24 | 0.42 |
| DDIT4   | DNA-DAMAGE-INDUCIBLE TRANSCRIPT 4                                               | 0.45  | 0.58  | 1.74  | 1.69  | 1.11  | 2.15 |
| DEPDC6  | DEP DOMAIN CONTAINING 6                                                         | -0.37 | -1.14 | 0.90  | 0.81  | 1.18  | 2.26 |
| DHX16   | DEAH (ASP-GLU-ALA-HIS) BOX POLYPEPTIDE 16                                       | 1.22  | 1.27  | -0.03 | -0.12 | -1.25 | 0.42 |
| DUSP5   | DUAL SPECIFICITY PHOSPHATASE 5                                                  | 3.11  | 2.87  | 4.55  | 5.22  | 1.44  | 2.71 |
| EAF2    | ELL ASSOCIATED FACTOR 2                                                         | 5.64  | 5.54  | 3.93  | 4.49  | -1.05 | 0.48 |
| EGLN3   | EGL NINE HOMOLOG 3                                                              | 2.61  | 2.91  | 0.78  | 0.91  | -1.70 | 0.31 |
| EIF2AK2 | EUKARYOTIC TRANSLATION INITIATION FACTOR 2-ALPHA KINASE 2                       | -0.16 | 0.00  | 1.56  | 2.09  | 1.56  | 2.95 |
| Eif2s3x | EUKARYOTIC TRANSLATION INITIATION FACTOR 2, SUBUNIT 3 GAMMA, 52kDA PSEUDOGENE   | 3.45  | 3.40  | 2.13  | 2.32  | -1.07 | 0.47 |
| EMILIN2 | ELASTIN MICROFIBRIL INTERFACER 2                                                | -1.62 | -1.31 | -0.28 | 0.03  | 1.03  | 2.04 |
| ENPP2   | ECTONUCLEOTIDE PYROPHOSPHATASE/PHOSPHODIESTERASE 2                              | 1.43  | 1.21  | -0.51 | -0.25 | -1.45 | 0.37 |
| F13A1   | COAGULATION FACTOR XIII, A1 POLYPEPTIDE                                         | -0.77 | -1.02 | 0.50  | 0.31  | 1.08  | 2.12 |
| FAM159B | SFRS12-INTERACTING PROTEIN 1; FAMILY WITH SEQUENCE SIMILARITY 159, MEMBER B     | 2.29  | 2.55  | 1.01  | 1.14  | -1.15 | 0.45 |
| FAM3B   | FAMILY WITH SEQUENCE SIMILARITY 3, MEMBER B                                     | -0.24 | -0.39 | 0.77  | 0.80  | 1.01  | 2.01 |
| FCER2   | FC FRAGMENT OF IGE, LOW AFFINITY II, RECEPTOR FOR (CD23)                        | 1.14  | 0.06  | 2.28  | 2.14  | 1.01  | 2.01 |
| FCGRT   | FC FRAGMENT OF IGG, RECEPTOR, TRANSPORTER, ALPHA                                | 5.08  | 4.94  | 3.49  | 3.70  | -1.24 | 0.42 |
| FEM1B   | FEM-1 HOMOLOG B                                                                 | 1.41  | 1.68  | 0.06  | 0.32  | -1.09 | 0.47 |
| FGFR1   | FIBROBLAST GROWTH FACTOR RECEPTOR 1                                             | 4.97  | 4.94  | 2.59  | 2.98  | -1.96 | 0.26 |
| FUT3    | FUCOSYLTRANSFERASE 3 (GALACTOSIDE 3(4)-L-FUCOSYLTRANSFERASE, LEWIS BLOOD GROUP) | 0.92  | 0.32  | 2.48  | 2.18  | 1.26  | 2.40 |
| FXYD6   | FXYD DOMAIN CONTAINING ION TRANSPORT REGULATOR 6                                | -0.21 | -1.34 | 1.85  | 1.63  | 1.84  | 3.57 |
| FYB     | FYN BINDING PROTEIN (FYB-120/130)                                               | -0.87 | -1.34 | 0.24  | 0.60  | 1.11  | 2.17 |
| GADD45B | GROWTH ARREST AND DNA-DAMAGE-INDUCIBLE, BETA                                    | 1.33  | 1.62  | 3.34  | 4.07  | 1.72  | 3.29 |
| GANAB   | GLUCOSIDASE, ALPHA ; NEUTRAL AB                                                 | 0.82  | 0.80  | -0.37 | -0.39 | -1.17 | 0.44 |
| GATC    | GLUTAMYL-TRNA(GLN) AMIDOTRANSFERASE, SUBUNIT C HOMOLOG                          | 2.25  | 2.59  | 0.58  | 1.20  | -1.05 | 0.48 |

|          |                                                                                                              |       |       |       |       |       |       |
|----------|--------------------------------------------------------------------------------------------------------------|-------|-------|-------|-------|-------|-------|
| GBP1     | GUANYLATE BINDING PROTEIN 1, INTERFERON-INDUCIBLE, 67kDA                                                     | -0.73 | 0.66  | 3.58  | 1.74  | 1.08  | 2.11  |
| GCLC     | GLUTAMATE-CYSTEINE LIGASE, CATALYTIC SUBUNIT                                                                 | -0.52 | -0.09 | 1.08  | 1.46  | 1.17  | 2.24  |
| GLS      | GLUTAMINASE                                                                                                  | 1.27  | 1.51  | 0.06  | -0.23 | -1.20 | 0.43  |
| GNPNAT1  | GLUCOSAMINE-PHOSPHATE N-ACETYLTRANSFERASE 1                                                                  | 2.12  | 2.16  | 0.62  | 1.05  | -1.07 | 0.47  |
| GNS      | GLUCOSAMINE (N-ACETYL)-6-SULFATASE                                                                           | -0.16 | -0.45 | 1.13  | 0.95  | 1.11  | 2.15  |
| GOLGB1   | GOLGIN B1, GOLGI INTEGRAL MEMBRANE PROTEIN                                                                   | 4.61  | 4.54  | 2.86  | 3.25  | -1.29 | 0.41  |
| GPR125   | G PROTEIN-COUPLED RECEPTOR 125                                                                               | 2.62  | 2.51  | 0.77  | 0.90  | -1.61 | 0.33  |
| GPR18    | G PROTEIN-COUPLED RECEPTOR 18                                                                                | 0.76  | 1.03  | -0.37 | -0.47 | -1.14 | 0.45  |
| GRAP     | GRB2-RELATED ADAPTOR PROTEIN                                                                                 | 2.20  | 2.42  | 1.08  | 0.85  | -1.11 | 0.46  |
| GTF2A1   | GENERAL TRANSCRIPTION FACTOR IIA, 1, 19/37kDA                                                                | 3.61  | 3.68  | 1.73  | 2.42  | -1.19 | 0.44  |
| GZMB     | GRANZYME B (GRANZYME 2, CYTOTOXIC T-LYMPHOCYTE-ASSOCIATED SERINE ESTERASE 1)                                 | 0.45  | 1.17  | 3.24  | 2.82  | 1.65  | 3.15  |
| HAO1     | HYDROXYACID OXIDASE (GLYCOLATE OXIDASE) 1                                                                    | -0.80 | -0.96 | 0.83  | 0.87  | 1.63  | 3.09  |
| HDDC3    | HD DOMAIN CONTAINING 3                                                                                       | 3.00  | 2.80  | 1.40  | 1.79  | -1.01 | 0.50  |
| HKR1     | GLI-KRUPPEL FAMILY MEMBER HKR1                                                                               | -1.17 | -1.79 | 1.65  | 3.50  | 2.82  | 7.07  |
| HLA-DRB1 | MAJOR HISTOCOMPATIBILITY COMPLEX, CLASS II, DR BETA 4; MAJOR HISTOCOMPATIBILITY COMPLEX, CLASS II, DR BETA 1 | 5.37  | 6.21  | 7.38  | 7.24  | 1.03  | 2.05  |
| HOPX     | HOP HOMEBOX                                                                                                  | 0.60  | 0.82  | -1.00 | -1.51 | -1.60 | 0.33  |
| HSPA12A  | HEAT SHOCK 70kDA PROTEIN 12A                                                                                 | 0.98  | 1.31  | -0.35 | -0.37 | -1.33 | 0.40  |
| HSPA1A   | HEAT SHOCK 70kDA PROTEIN 1A; HEAT SHOCK 70kDA PROTEIN 1B                                                     | 3.80  | 4.10  | 1.55  | 1.93  | -1.87 | 0.27  |
| HSPB1    | HEAT SHOCK 27kDA PROTEIN-LIKE 2 PSEUDOGENE; HEAT SHOCK 27kDA PROTEIN 1                                       | 1.91  | 1.28  | 5.47  | 5.11  | 3.20  | 9.22  |
| HSPH1    | HEAT SHOCK 105kDA/110kDA PROTEIN 1                                                                           | 0.04  | 0.29  | 1.45  | 2.06  | 1.16  | 2.24  |
| HYAL2    | HYALURONOGLUCOSAMINIDASE 2                                                                                   | -0.50 | -0.98 | 1.21  | 1.17  | 1.67  | 3.18  |
| IFNG     | INTERFERON, GAMMA                                                                                            | -1.19 | -1.64 | -0.10 | -0.18 | 1.01  | 2.02  |
| IGH@     | IMMUNOGLOBULIN HEAVY CONSTANT GAMMA 1 (G1M MARKER)                                                           | 5.35  | 5.36  | 3.72  | 3.96  | -1.38 | 0.38  |
| IGHA1    | IMMUNOGLOBULIN HEAVY CONSTANT ALPHA 1                                                                        | 11.61 | 11.64 | 9.91  | 10.29 | -1.32 | 0.40  |
| IGHE     | IMMUNOGLOBULIN HEAVY CONSTANT EPSILON                                                                        | 7.54  | 6.23  | 3.89  | 5.08  | -1.15 | 0.45  |
| IGHG1    | IMMUNOGLOBULIN HEAVY CONSTANT GAMMA 1 (G1M MARKER)                                                           | 8.23  | 8.35  | 6.16  | 6.27  | -1.96 | 0.26  |
| Ighv     | IMMUNOGLOBULIN HEAVY VARIABLE                                                                                | 5.06  | 5.08  | 3.43  | 3.63  | -1.43 | 0.37  |
| IGL@     | IMMUNOGLOBULIN LAMBDA VARIABLE 2-11                                                                          | 4.70  | 4.35  | 2.58  | 2.75  | -1.60 | 0.33  |
| IGLL1    | IMMUNOGLOBULIN LAMBDA-LIKE POLYPEPTIDE 1                                                                     | 5.93  | 5.78  | 4.51  | 4.45  | -1.27 | 0.41  |
| IGLV     | IMMUNOGLOBULIN LAMDA-VARIABLE                                                                                | 6.58  | 5.96  | 4.69  | 4.76  | -1.20 | 0.44  |
| IL12RB1  | INTERLEUKIN 12 RECEPTOR, BETA 1                                                                              | 2.15  | 2.67  | 0.89  | 0.89  | -1.26 | 0.42  |
| IL8      | INTERLEUKIN 8                                                                                                | -1.84 | -1.61 | 0.33  | 0.97  | 1.95  | 3.86  |
| INF2     | INVERTED FORMIN, FH2 AND WH2 DOMAIN CONTAINING                                                               | 0.93  | 1.00  | -0.31 | -0.28 | -1.22 | 0.43  |
| INPP1    | INOSITOL POLYPHOSPHATE-1-PHOSPHATASE                                                                         | 2.92  | 3.14  | 1.70  | 1.69  | -1.22 | 0.43  |
| IQCB1    | IQ MOTIF CONTAINING B1                                                                                       | 2.92  | 3.31  | 1.55  | 1.90  | -1.02 | 0.49  |
| ISG15    | ISG15 UBIQUITIN-LIKE MODIFIER                                                                                | 1.44  | 0.93  | 7.26  | 7.48  | 5.83  | 56.76 |
| ITGB1    | INTEGRIN, BETA 1 (FIBRONECTIN RECEPTOR, BETA POLYPEPTIDE, ANTIGEN CD29 INCLUDES MDF2, MSK12)                 | 6.20  | 6.62  | 4.22  | 5.05  | -1.15 | 0.45  |
| JHDM1D   | JUMONJI C DOMAIN CONTAINING HISTONE DEMETHYLASE 1 HOMOLOG D                                                  | 1.51  | 1.57  | 0.25  | 0.12  | -1.26 | 0.42  |
| KCNA3    | POTASSIUM VOLTAGE-GATED CHANNEL, SHAKER-RELATED SUBFAMILY, MEMBER 3                                          | 2.81  | 2.55  | 0.82  | 1.26  | -1.29 | 0.41  |
| KIAA0528 | KIAA0528                                                                                                     | 4.06  | 4.38  | 2.69  | 3.06  | -1.00 | 0.50  |
| KIAA1370 | KIAA1370                                                                                                     | 2.07  | 2.39  | 0.90  | 0.80  | -1.18 | 0.44  |
| KLF3     | KRUPPEL-LIKE FACTOR 3                                                                                        | 3.05  | 3.04  | 1.66  | 1.99  | -1.05 | 0.48  |
| KLF4     | KRUPPEL-LIKE FACTOR 4                                                                                        | -0.17 | 0.31  | 1.54  | 2.52  | 1.23  | 2.34  |

|           |                                                                                     |       |       |       |       |       |       |
|-----------|-------------------------------------------------------------------------------------|-------|-------|-------|-------|-------|-------|
| LGALS1    | LECTIN, GALACTOSIDE-BINDING, SOLUBLE, 1                                             | 1.60  | 0.69  | 3.62  | 4.07  | 2.02  | 4.06  |
| LIPA      | LIPASE A, LYSOSOMAL ACID, CHOLESTEROL ESTERASE                                      | 0.92  | 0.54  | 3.52  | 3.84  | 2.60  | 6.06  |
| LOC750761 | LOC750761                                                                           | 0.69  | 0.63  | 2.06  | 2.14  | 1.37  | 2.58  |
| LRP1      | LOW DENSITY LIPOPROTEIN-RELATED PROTEIN 1 (ALPHA-2-MACROGLOBULIN RECEPTOR)          | -0.94 | -1.18 | 0.76  | 0.86  | 1.70  | 3.25  |
| LRRC33    | LEUCINE RICH REPEAT CONTAINING 33                                                   | 1.20  | 1.56  | -0.14 | 0.02  | -1.18 | 0.44  |
| LTF       | LACTOTRANSFERRIN                                                                    | -1.50 | -1.69 | 0.45  | 0.47  | 1.94  | 3.85  |
| LY6E      | LYMPHOCYTE ANTIGEN 6 COMPLEX, LOCUS E                                               | 1.35  | -0.48 | 2.79  | 3.07  | 1.44  | 2.72  |
| LYZ       | LYSOZYME                                                                            | 0.72  | 1.35  | 3.45  | 3.60  | 2.10  | 4.29  |
| MAFB      | V-MAF MUSCULOAPONEUROTIC FIBROSARCOMA ONCOGENE HOMOLOG B                            | -1.67 | -1.40 | 0.67  | 0.76  | 2.07  | 4.21  |
| MBD4      | METHYL-CPG BINDING DOMAIN PROTEIN 4                                                 | 4.31  | 4.72  | 2.72  | 3.10  | -1.21 | 0.43  |
| MEF2C     | MYOCYTE ENHANCER FACTOR 2C                                                          | 3.54  | 3.72  | 2.25  | 1.92  | -1.29 | 0.41  |
| METTL14   | METHYLTRANSFERASE LIKE 14                                                           | 2.69  | 2.87  | 0.73  | 1.47  | -1.23 | 0.43  |
| MLH3      | MUTL HOMOLOG 3                                                                      | 0.49  | 0.75  | -0.54 | -0.69 | -1.03 | 0.49  |
| MND1      | MEIOTIC NUCLEAR DIVISIONS 1 HOMOLOG                                                 | 5.06  | 4.45  | 2.50  | 3.05  | -1.41 | 0.38  |
| MPZL1     | MYELIN PROTEIN ZERO-LIKE 1                                                          | 2.32  | 2.50  | 0.84  | 1.23  | -1.09 | 0.47  |
| MS4A8B    | MEMBRANE-SPANNING 4-DOMAINS, SUBFAMILY A, MEMBER 8B                                 | -1.43 | -1.34 | 0.14  | 0.30  | 1.48  | 2.80  |
| MT1A      | METALLOTHIONEIN 1A                                                                  | -2.12 | -1.91 | -0.65 | -0.25 | 1.26  | 2.39  |
| MT2A      | METALLOTHIONEIN 2A                                                                  | 1.77  | 0.55  | 3.86  | 4.54  | 2.09  | 4.26  |
| MX1       | MYXOVIRUS (INFLUENZA VIRUS) RESISTANCE 1, INTERFERON-INDUCIBLE PROTEIN P78          | 2.59  | 2.17  | 5.81  | 5.79  | 3.20  | 9.18  |
| MX2       | MYXOVIRUS (INFLUENZA VIRUS) RESISTANCE 2                                            | -0.04 | -0.18 | 5.16  | 5.42  | 5.20  | 36.77 |
| MYLIP     | MYOSIN REGULATORY LIGHT CHAIN INTERACTING PROTEIN                                   | 1.16  | 1.19  | 2.38  | 2.61  | 1.19  | 2.28  |
| MYOF      | MYOFERLIN                                                                           | -0.99 | -1.33 | 0.77  | 1.46  | 1.76  | 3.40  |
| NDRG1     | N-MYC DOWNSTREAM REGULATED 1                                                        | 0.30  | -0.51 | 1.71  | 3.01  | 1.41  | 2.66  |
| NEK6      | NIMA (NEVER IN MITOSIS GENE A)-RELATED KINASE 6                                     | 2.57  | 2.49  | 0.92  | 0.88  | -1.58 | 0.33  |
| NFAT5     | NUCLEAR FACTOR OF ACTIVATED T-CELLS 5, TONICITY-RESPONSIVE                          | 4.16  | 4.65  | 2.98  | 3.05  | -1.12 | 0.46  |
| NFIL3     | NUCLEAR FACTOR, INTERLEUKIN 3 REGULATED                                             | -0.20 | -0.31 | 1.44  | 1.75  | 1.63  | 3.10  |
| NFKBIA    | NUCLEAR FACTOR OF KAPPA LIGHT POLYPEPTIDE GENE ENHANCER IN B-CELLS INHIBITOR, ALPHA | 3.45  | 4.33  | 5.50  | 5.80  | 1.17  | 2.26  |
| NMRAL1    | NMRA-LIKE FAMILY DOMAIN CONTAINING 1                                                | 4.58  | 4.51  | 2.53  | 3.08  | -1.42 | 0.37  |
| NMT2      | N-MYRISTOYLTRANSFERASE 2                                                            | 2.26  | 2.56  | 0.30  | 0.35  | -1.90 | 0.27  |
| NT5E      | 5'-NUCLEOTIDASE, ECTO (CD73)                                                        | 0.62  | 0.90  | -0.84 | -0.48 | -1.10 | 0.47  |
| NUP43     | NUCLEOPORIN 43KDA                                                                   | 1.79  | 1.96  | 0.20  | 0.68  | -1.11 | 0.46  |
| NUPR1     | NUCLEAR PROTEIN, TRANSCRIPTIONAL REGULATOR, 1                                       | 1.96  | 2.14  | 0.60  | 0.28  | -1.37 | 0.39  |
| PACSIN1   | PROTEIN KINASE C AND CASEIN KINASE SUBSTRATE IN NEURONS 1                           | -0.75 | -1.43 | 0.31  | 0.37  | 1.05  | 2.08  |
| PARP2     | POLY (ADP-RIBOSE) POLYMERASE 2                                                      | 2.80  | 3.26  | 1.66  | 1.13  | -1.14 | 0.46  |
| PIGR      | POLYMERIC IMMUNOGLOBULIN RECEPTOR                                                   | -1.95 | -1.79 | -0.58 | -0.40 | 1.22  | 2.32  |
| PLA2G16   | PHOSPHOLIPASE A2, GROUP XVI                                                         | 2.26  | 1.73  | 3.79  | 3.55  | 1.29  | 2.45  |
| PLAC8     | PLACENTA-SPECIFIC 8                                                                 | 7.27  | 5.92  | 8.41  | 9.38  | 1.15  | 2.22  |
| PLCB2     | PHOSPHOLIPASE C, BETA 2                                                             | 1.88  | 1.50  | 0.37  | 0.21  | -1.13 | 0.46  |
| PLOD1     | PROCOLLAGEN-LYSINE 1, 2-OXOGLUTARATE 5-DIOXYGENASE 1                                | -0.92 | -1.15 | 0.84  | 1.32  | 1.76  | 3.40  |
| PPM1B     | PROTEIN PHOSPHATASE 1B (FORMERLY 2C), MAGNESIUM-DEPENDENT, BETA ISOFORM             | 1.61  | 1.79  | 0.17  | 0.34  | -1.27 | 0.42  |
| PRDX3     | PEROXIREDOXIN 3                                                                     | 4.85  | 5.06  | 2.86  | 3.70  | -1.16 | 0.45  |
| PRSS23    | PROTEASE, SERINE, 23                                                                | -1.67 | -1.73 | -0.21 | -0.66 | 1.01  | 2.01  |
| PTX3      | PENTRAXIN-RELATED GENE, RAPIDLY INDUCED BY IL-1 BETA                                | -2.05 | -2.04 | -0.75 | -0.73 | 1.29  | 2.45  |



|          |                                                                                     |       |       |       |       |       |       |
|----------|-------------------------------------------------------------------------------------|-------|-------|-------|-------|-------|-------|
| RAB27A   | RAB27A, MEMBER RAS ONCOGENE FAMILY                                                  | 3.14  | 2.91  | 1.68  | 1.82  | -1.10 | 0.47  |
| RABEPK   | Rab9 EFFECTOR PROTEIN WITH KELCH MOTIFS                                             | 1.97  | 1.97  | 0.44  | 0.97  | -1.00 | 0.50  |
| RAD51L1  | RAD51-LIKE 1                                                                        | 4.59  | 3.89  | 2.84  | 2.31  | -1.05 | 0.48  |
| RGS1     | REGULATOR OF G-PROTEIN SIGNALING 1                                                  | 1.87  | 1.33  | 2.91  | 4.32  | 1.04  | 2.05  |
| RGS18    | REGULATOR OF G-PROTEIN SIGNALING 18                                                 | 2.42  | 2.90  | 0.88  | 1.35  | -1.07 | 0.48  |
| RGS2     | REGULATOR OF G-PROTEIN SIGNALING 2, 24KDA                                           | 0.83  | 0.24  | 3.01  | 3.36  | 2.17  | 4.50  |
| RHOH     | RAS HOMOLOG GENE FAMILY, MEMBER H                                                   | 2.62  | 2.93  | 1.37  | 1.60  | -1.02 | 0.49  |
| RNASE4   | RIBONUCLEASE, RNASE A FAMILY, 4                                                     | 1.01  | -0.20 | 2.76  | 3.27  | 1.75  | 3.36  |
| RNF212   | RING FINGER PROTEIN 212                                                             | 0.09  | 0.05  | 1.66  | 1.32  | 1.23  | 2.34  |
| RRAS2    | RELATED RAS VIRAL (R-RAS) ONCOGENE HOMOLOG 2                                        | 2.43  | 2.91  | 0.87  | 0.87  | -1.56 | 0.34  |
| RSAD2    | RADICAL S-ADENOSYL METHIONINE DOMAIN CONTAINING 2                                   | -1.89 | -1.76 | -0.05 | -0.26 | 1.50  | 2.83  |
| RSRC1    | ARGININE/SERINE-RICH COILED-COIL 1                                                  | 3.19  | 3.10  | 1.33  | 1.89  | -1.21 | 0.43  |
| RTP4     | RECEPTOR (CHEMOSENSORY) TRANSPORTER PROTEIN 4                                       | 3.12  | 2.82  | 5.38  | 5.38  | 2.26  | 4.79  |
| S100A12  | S100 CALCIUM BINDING PROTEIN A12                                                    | 0.36  | 0.82  | 3.09  | 3.09  | 2.27  | 4.82  |
| S100A4   | S100 CALCIUM BINDING PROTEIN A4                                                     | 2.05  | 2.27  | 4.80  | 4.45  | 2.18  | 4.53  |
| S100A8   | S100 CALCIUM BINDING PROTEIN A8                                                     | -0.27 | 0.98  | 3.77  | 3.86  | 2.79  | 6.92  |
| S100A9   | S100 CALCIUM BINDING PROTEIN A9                                                     | -1.37 | -0.83 | 2.72  | 2.43  | 3.26  | 9.58  |
| SBK1     | SH3-BINDING DOMAIN KINASE 1                                                         | 5.51  | 5.74  | 4.38  | 4.02  | -1.12 | 0.46  |
| SDF2L1   | STROMAL CELL-DERIVED FACTOR 2-LIKE 1                                                | 6.91  | 6.77  | 4.97  | 5.65  | -1.12 | 0.46  |
| SELPLG   | SELECTIN P LIGAND                                                                   | 2.95  | 3.13  | 1.35  | 1.89  | -1.06 | 0.48  |
| SERINC4  | SERINE INCORPORATOR 4                                                               | 1.65  | 1.74  | 3.25  | 3.18  | 1.44  | 2.71  |
| SERPINA1 | SERPIN PEPTIDASE INHIBITOR, CLADE A (ALPHA-1 ANTITRYPSIN, ANITRYPSIN), MEMBER 1     | -1.83 | -1.56 | -0.44 | -0.27 | 1.12  | 2.17  |
| SHISA5   | SHISA HOMOLOG 5                                                                     | -0.32 | -0.44 | 0.90  | 1.06  | 1.22  | 2.32  |
| SLC11A1  | SOLUTE CARRIER FAMILY 11 (PROTON-COUPLED DIVALENT METAL ION TRANSPORTERS), MEMBER 1 | 0.08  | -0.08 | 2.75  | 2.27  | 2.19  | 4.57  |
| SLC40A1  | SOLUTE CARRIER FAMILY 40 (IRON-REGULATED TRANSPORTER), MEMBER 1                     | -1.59 | -1.53 | -0.02 | -0.39 | 1.14  | 2.20  |
| SMAD6    | SMAD FAMILY MEMBER 6                                                                | 0.07  | 0.07  | -0.94 | -1.00 | -1.01 | 0.50  |
| SMC4     | STRUCTURAL MAINTENANCE OF CHROMOSOMES 4                                             | 3.32  | 3.35  | 1.73  | 2.24  | -1.08 | 0.47  |
| SMYD2    | SET AND MYND DOMAIN CONTAINING 2                                                    | -0.12 | -0.26 | 1.12  | 2.12  | 1.24  | 2.36  |
| SNTB2    | SYNTROPHIN, BETA 2                                                                  | 2.86  | 2.86  | 1.63  | 1.76  | -1.09 | 0.47  |
| SNX10    | SORTING NEXIN 10                                                                    | 3.73  | 3.90  | 2.41  | 2.57  | -1.16 | 0.45  |
| SOCS2    | SUPPRESSOR OF CYTOKINE SIGNALING 2                                                  | -1.37 | -1.26 | 1.49  | 2.03  | 2.76  | 6.76  |
| SOCS3    | SUPPRESSOR OF CYTOKINE SIGNALING 3                                                  | -1.86 | -1.61 | -0.51 | -0.48 | 1.11  | 2.16  |
| SPEG     | SPEG COMPLEX LOCUS                                                                  | 1.55  | 0.39  | 5.57  | 5.10  | 3.56  | 11.76 |
| SPRY1    | SPROUTY HOMOLOG 1, ANTAGONIST OF FGF SIGNALING                                      | -1.29 | -1.33 | -0.09 | -0.21 | 1.09  | 2.12  |
| ST3GAL1  | ST3 BETA-GALACTOSIDE ALPHA-2,3-SIALYLTRANSFERASE 1                                  | 6.92  | 7.16  | 5.59  | 5.74  | -1.18 | 0.44  |
| STAT4    | SIGNAL TRANSDUCER AND ACTIVATOR OF TRANSCRIPTION 4                                  | 1.57  | 1.05  | 2.96  | 3.38  | 1.40  | 2.64  |
| SULT1A1  | SULFOTRANSFERASE FAMILY, CYTOSOLIC, 1A, PHENOL-PREFERRING, MEMBER 1                 | 0.02  | 0.21  | 1.28  | 1.28  | 1.06  | 2.09  |
| TCEA3    | TRANSCRIPTION ELONGATION FACTOR A (SII), 3                                          | -1.80 | -1.73 | 0.00  | 1.81  | 1.73  | 3.32  |
| TDG      | SIMILAR TO G/T MISMATCH-SPECIFIC THYMINE DNA GLYCOSYLASE; THYMINE-DNA GLYCOSYLASE   | 2.77  | 2.82  | 0.52  | 1.17  | -1.61 | 0.33  |
| TESC     | TESCALCIN                                                                           | 4.37  | 4.57  | 2.95  | 2.64  | -1.42 | 0.37  |
| THBS1    | THROMBOSPONDIN 1                                                                    | -0.79 | -1.37 | 1.04  | 0.50  | 1.29  | 2.45  |
| TIPIN    | TIMELESS INTERACTING PROTEIN                                                        | 2.51  | 2.16  | -0.02 | 0.27  | -1.89 | 0.27  |
| TLR10    | TOLL-LIKE RECEPTOR 10                                                               | 2.12  | 3.36  | 0.92  | 0.57  | -1.20 | 0.44  |

|           |                                                        |       |       |       |       |       |       |
|-----------|--------------------------------------------------------|-------|-------|-------|-------|-------|-------|
| TM9SF2    | TRANSMEMBRANE 9 SUPERFAMILY MEMBER 2                   | -2.06 | -1.73 | 2.10  | 2.49  | 3.83  | 14.22 |
| TMEM51    | TRANSMEMBRANE PROTEIN 51                               | -1.67 | -1.58 | -0.25 | 0.32  | 1.33  | 2.52  |
| TNF       | TUMOR NECROSIS FACTOR (TNF SUPERFAMILY, MEMBER 2)      | 2.52  | 1.82  | 3.59  | 4.70  | 1.07  | 2.11  |
| TNFAIP3   | TUMOR NECROSIS FACTOR, ALPHA-INDUCED PROTEIN 3         | 4.19  | 3.78  | 5.82  | 6.18  | 1.64  | 3.11  |
| TNFRSF13B | TUMOR NECROSIS FACTOR RECEPTOR SUPERFAMILY, MEMBER 13B | 3.53  | 3.55  | 1.67  | 2.20  | -1.33 | 0.40  |
| TNFRSF17  | TUMOR NECROSIS FACTOR RECEPTOR SUPERFAMILY, MEMBER 17  | 1.32  | 1.75  | -0.31 | -0.17 | -1.49 | 0.36  |
| TNFSF13B  | TUMOR NECROSIS FACTOR (LIGAND) SUPERFAMILY, MEMBER 13B | -1.50 | -1.53 | -0.02 | -0.33 | 1.17  | 2.24  |
| TRAF3     | TNF RECEPTOR-ASSOCIATED FACTOR 3                       | 4.37  | 4.66  | 2.76  | 3.05  | -1.33 | 0.40  |
| Trg1      | TRNA GLYCINE1                                          | 2.38  | 1.73  | 3.78  | 4.58  | 1.40  | 2.64  |
| TRIB2     | TRIBBLES HOMOLOG 2                                     | 5.00  | 5.24  | 3.57  | 3.62  | -1.38 | 0.38  |
| TRIM50    | TRIPARTITE MOTIF-CONTAINING 50                         | -1.34 | -1.15 | 0.23  | -0.05 | 1.10  | 2.14  |
| TSPAN13   | TETRASPANIN 13                                         | 3.27  | 3.31  | 1.98  | 1.85  | -1.29 | 0.41  |
| UBE2D4    | UBIQUITIN-CONJUGATING ENZYME E2D 4                     | 2.05  | 2.51  | 0.84  | 0.96  | -1.10 | 0.47  |
| UBE2H     | UBIQUITIN-CONJUGATING ENZYME E2H                       | 4.07  | 4.09  | 2.50  | 2.57  | -1.50 | 0.35  |
| UBE2L6    | UBIQUITIN-CONJUGATING ENZYME E2L 6                     | 2.45  | 2.07  | 4.86  | 4.97  | 2.41  | 5.31  |
| UNC119B   | UNC-119 HOMOLOG B                                      | 2.16  | 2.19  | 0.73  | 0.86  | -1.30 | 0.41  |
| VCL       | VINCULIN                                               | 4.52  | 4.54  | 2.85  | 3.33  | -1.19 | 0.44  |
| VPS13D    | VACUOLAR PROTEIN SORTING 13 HOMOLOG D                  | 2.29  | 0.01  | 5.23  | 5.10  | 2.81  | 7.00  |
| VWA5A     | VON WILLEBRAND FACTOR A DOMAIN CONTAINING 5A           | -1.64 | -1.38 | -0.23 | -0.15 | 1.15  | 2.22  |
| WDR34     | WD REPEAT DOMAIN 34                                    | 3.21  | 3.05  | 1.36  | 2.01  | -1.05 | 0.48  |
| XAF1      | XIAP ASSOCIATED FACTOR 1                               | 0.44  | -0.02 | 3.08  | 3.01  | 2.58  | 5.97  |
| XIST      | X (INACTIVE)-SPECIFIC TRANSCRIPT                       | 4.69  | 4.58  | -0.69 | -1.26 | -5.27 | 0.03  |
| ZBTB10    | ZINC FINGER AND BTB DOMAIN CONTAINING 10               | 0.13  | 0.28  | 1.85  | 2.18  | 1.58  | 2.98  |
| ZBTB32    | ZINC FINGER AND BTB DOMAIN CONTAINING 32               | 2.63  | 2.67  | 0.65  | 1.39  | -1.24 | 0.42  |
| ZFYVE27   | ZINC FINGER, FYVE DOMAIN CONTAINING 27                 | 3.53  | 3.50  | 2.07  | 2.47  | -1.03 | 0.49  |
| ZNF207    | ZINC FINGER PROTEIN 207                                | 4.43  | 4.50  | 2.57  | 3.27  | -1.16 | 0.45  |

\* The genes presenting a minimum fold change >2 and <0.5 in the 2 infected samples relatively to the 2 control samples were considered as DEG.

**Table S2. DEG in lymph node pDCs upon BTV infection\***

| Official gene symbol | Approved name                                                       | Raw.pValue | Adj.pValue | Mean fold change (log2) | Mean fold change |
|----------------------|---------------------------------------------------------------------|------------|------------|-------------------------|------------------|
| AADAT                | AMINOADIPATE AMINOTRANSFERASE                                       | 0.00016351 | 0.00377906 | -1.20                   | 0.44             |
| ABCA4                | ATP-BINDING CASSETTE, SUB-FAMILY A (ABC1), MEMBER 4                 | 0.00198906 | 0.01646099 | -1.43                   | 0.37             |
| ABCC10               | ATP-BINDING CASSETTE, SUB-FAMILY B (MDR/TAP), MEMBER 10             | 2.928E-06  | 0.00045085 | 1.52                    | 2.86             |
| ABCF1                | ATP-BINDING CASSETTE, SUB-FAMILY F (GCN20), MEMBER 1                | 4.0622E-05 | 0.00185521 | 1.16                    | 2.24             |
| ABHD11               | ABHYDROLASE DOMAIN CONTAINING 11                                    | 0.0001175  | 0.00316259 | 1.10                    | 2.15             |
| ABHD5                | ABHYDROLASE DOMAIN CONTAINING 5                                     | 0.00184816 | 0.01581043 | -1.26                   | 0.42             |
| ACAA2                | ACETYL-CoA ACYLTRANSFERASE 2                                        | 0.00105287 | 0.01133196 | 1.20                    | 2.30             |
| ACAT1                | ACETYL-CoA ACETYLTRANSFERASE 1                                      | 1.6518E-06 | 0.00033494 | -1.33                   | 0.40             |
| ACOT7                | ACYL-CoA THIOESTERASE 7                                             | 0.0002258  | 0.00441947 | 2.18                    | 4.55             |
| ACSL3                | ACYL-CoA SYNTHETASE LONG-CHAIN FAMILY MEMBER 3                      | 1.2843E-07 | 0.00012069 | -2.16                   | 0.22             |
| ADAM8                | ADAM METALLOPEPTIDASE DOMAIN 8                                      | 6.6556E-05 | 0.00229519 | -1.18                   | 0.44             |
| ADK                  | ADENOSINE KINASE                                                    | 0.00716391 | 0.03237038 | -1.04                   | 0.49             |
| AHSA1                | AHA1, ACTIVATOR OF HEAT SHOCK 90KDA PROTEIN ATPASE HOMOLOG 1        | 5.4762E-07 | 0.00020821 | 1.91                    | 3.76             |
| ALDH1A1              | ALDEHYDE DEHYDROGENASE 1 FAMILY, MEMBER A1                          | 0.00027673 | 0.00503415 | -2.05                   | 0.24             |
| AMZ2                 | ARCHAELYSIN FAMILY METALLOPEPTIDASE 2                               | 2.628E-05  | 0.00148024 | -1.36                   | 0.39             |
| ANK3                 | ANKYRIN 3, NODE OF RANVIER                                          | 2.7999E-05 | 0.00155412 | -1.19                   | 0.44             |
| ANKRD10              | ANKYRIN REPEAT DOMAIN 10                                            | 5.2647E-06 | 0.00061209 | 1.41                    | 2.65             |
| ANP32A               | ACIDIC (LEUCINE-RICH) NUCLEAR PHOSPHOPROTEIN 32 FAMILY, MEMBER A    | 0.00428575 | 0.0248675  | 1.37                    | 2.59             |
| ANTXR2               | ANTHRAX TOXIN RECEPTOR 2                                            | 0.00018846 | 0.00408519 | 1.70                    | 3.25             |
| AP3S2                | ADAPTOR-RELATED PROTEIN COMPLEX 3, SIGMA 2 SUBUNIT                  | 8.0435E-05 | 0.00252217 | 1.01                    | 2.02             |
| APLP2                | AMYLOID BETA (A4) PRECURSOR-LIKE PROTEIN 2                          | 0.00017421 | 0.00391343 | -1.04                   | 0.48             |
| APOBEC3H             | APOLIPOPROTEIN B mRNA EDITING ENZYME, CATALYTIC POLYPEPTIDE-LIKE 3H | 0.00020922 | 0.00429392 | -2.12                   | 0.23             |
| ARG2                 | ARGINASE, TYPE II                                                   | 0.00012254 | 0.00321637 | -1.12                   | 0.46             |
| ARHGAP30             | RHO GTPASE ACTIVATING PROTEIN 30                                    | 0.00597236 | 0.02957032 | -1.16                   | 0.45             |
| ARID3A               | AT RICH INTERACTIVE DOMAIN 3A (BRIGHT-LIKE)                         | 0.00026513 | 0.00490736 | 1.01                    | 2.01             |
| ARL2                 | ADP-RIBOSYLATION FACTOR-LIKE 2                                      | 7.6211E-05 | 0.00244632 | -1.10                   | 0.47             |
| ARL4C                | ADP-RIBOSYLATION FACTOR-LIKE 4C                                     | 4.3511E-06 | 0.00056557 | -1.45                   | 0.37             |
| ARPC3                | ACTIN RELATED PROTEIN 2/3 COMPLEX, SUBUNIT 3, 21KDA                 | 0.00059231 | 0.007874   | -1.29                   | 0.41             |
| ARPC5L               | ACTIN RELATED PROTEIN 2/3 COMPLEX, SUBUNIT 5-LIKE                   | 8.2225E-06 | 0.00078155 | 1.46                    | 2.75             |
| ASF1B                | ASF1 ANTI-SILENCING FUNCTION 1 HOMOLOG B                            | 0.00133711 | 0.01303511 | 1.12                    | 2.18             |
| ASNS                 | ASPARAGINE SYNTHETASE (GLUTAMINE-HYDROLYZING)                       | 0.00075263 | 0.00910576 | 1.02                    | 2.03             |
| ATP8B1               | ATPASE, AMINOPHOSPHOLIPID TRANSPORTER, CLASS I, TYPE 8B, MEMBER 1   | 0.00798805 | 0.03419081 | -1.08                   | 0.47             |
| AURKB                | AURORA KINASE B                                                     | 0.0006679  | 0.00847875 | 1.23                    | 2.35             |
| AZI2                 | 5-AZACYTIDINE INDUCED 2                                             | 3.0188E-06 | 0.00045909 | 1.22                    | 2.33             |
| AZIN1                | ANTIZYME INHIBITOR 1                                                | 0.00124125 | 0.01243538 | -1.19                   | 0.44             |
| B4GALT1              | UDP-GAL:BETA GLCNAC BETA 1,4- GALACTOSYLTRANSFERASE, POLYPEPTIDE 1  | 4.9907E-06 | 0.00060556 | -1.49                   | 0.36             |
| BAG2                 | BCL2-ASSOCIATED ATHANOGENE 2                                        | 4.0152E-05 | 0.00184482 | 1.39                    | 2.61             |
| BAMBI                | BMP AND ACTIVIN MEMBRANE-BOUND INHIBITOR                            | 8.3932E-05 | 0.00258388 | -1.58                   | 0.33             |
| BAT1                 | DEAD (ASP-GLU-ALA-ASP) BOX POLYPEPTIDE 39B                          | 7.5769E-05 | 0.00244632 | 1.01                    | 2.02             |
| BATF                 | BASIC LEUCINE ZIPPER TRANSCRIPTION FACTOR, ATF-LIKE 3               | 3.5354E-06 | 0.00051206 | 1.89                    | 3.70             |
| BATF3                | BASIC LEUCINE ZIPPER TRANSCRIPTION FACTOR, ATF-LIKE 3               | 5.525E-05  | 0.00209535 | 2.28                    | 4.87             |
| BC017643             | CHROMOSOME 17 OPEN READING FRAME 62 ORTHOLOG                        | 0.00021881 | 0.00436958 | 1.04                    | 2.06             |
| BCAS2                | HYPOTHETICAL LOC496329                                              | 6.7174E-05 | 0.0022989  | -1.31                   | 0.40             |
| BCL11B               | B-CELL CLL/LYMPHOMA 11B (ZINC FINGER PROTEIN)                       | 0.0014892  | 0.01389437 | -1.99                   | 0.25             |
| BIRC5                | BACULOVIRAL IAP REPEAT-CONTAINING 5                                 | 0.00382763 | 0.02338714 | 1.65                    | 3.14             |
| BLMH                 | BLEOMYCIN HYDROLASE                                                 | 0.00259523 | 0.01899077 | -1.13                   | 0.46             |
| BMP2                 | BONE MORPHOGENETIC PROTEIN 2                                        | 0.00066865 | 0.00847875 | 1.00                    | 2.00             |
| BNIP3L               | BCL2/ADENOVIRUS E1B 19KDA INTERACTING PROTEIN 3-LIKE                | 0.00024991 | 0.00475087 | -1.21                   | 0.43             |
| BRD2                 | BROMODOMAIN CONTAINING 2                                            | 0.00228953 | 0.01787431 | -1.03                   | 0.49             |
| BRD8                 | BROMODOMAIN CONTAINING 8                                            | 0.00055493 | 0.00760994 | 1.32                    | 2.51             |
| BSG                  | BASIGIN (OK BLOOD GROUP)                                            | 0.0004337  | 0.00660811 | 1.33                    | 2.51             |
| BTG1                 | B-CELL TRANSLOCATION GENE 1, ANTI-PROLIFERATIVE                     | 6.6386E-05 | 0.00229454 | -2.07                   | 0.24             |
| BTG2                 | BTG FAMILY, MEMBER 2                                                | 0.00172089 | 0.0150972  | -1.19                   | 0.44             |
| BTK                  | TYROSINE-PROTEIN KINASE BTK                                         | 1.5923E-06 | 0.00033494 | 1.73                    | 3.32             |
| BXDC2                | BRX1, BIOGENESIS OF RIBOSOMES, HOMOLOG                              | 1.974E-05  | 0.0012798  | 1.21                    | 2.32             |
| C10H15ORF23          | CHROMOSOME 15 OPEN READING FRAME 23                                 | 2.4041E-05 | 0.00139548 | 1.19                    | 2.28             |
| C13ORF15             | CHROMOSOME 13 OPEN READING FRAME 15                                 | 1.1578E-06 | 0.00029346 | -1.73                   | 0.30             |
| C16ORF53             | CHROMOSOME 16 OPEN READING FRAME 53                                 | 9.1938E-05 | 0.00272023 | 1.17                    | 2.25             |
| C16ORF88             | TESTIS-SPECIFIC GENE 118 PROTEIN                                    | 0.00071507 | 0.00881269 | 1.23                    | 2.35             |

|            |                                                                                  |            |            |       |      |
|------------|----------------------------------------------------------------------------------|------------|------------|-------|------|
| C19ORF33   | CHROMOSOME 19 OPEN READING FRAME 33                                              | 0.00011046 | 0.0030377  | -1.28 | 0.41 |
| C19ORF40   | CHROMOSOME 19 OPEN READING FRAME 40                                              | 4.6821E-06 | 0.00058847 | 1.24  | 2.36 |
| C19ORF50   | CHROMOSOME 19 OPEN READING FRAME 50                                              | 2.1461E-05 | 0.00132312 | 1.24  | 2.37 |
| C10RF124   | CHROMOSOME 1 OPEN READING FRAME 124                                              | 7.6729E-05 | 0.00244632 | 1.02  | 2.03 |
| C10RF38    | CHROMOSOME 1 OPEN READING FRAME 38                                               | 6.156E-06  | 0.00063971 | 1.64  | 3.12 |
| C22ORF28   | CHROMOSOME 22 OPEN READING FRAME 28                                              | 6.2367E-05 | 0.00218544 | 1.12  | 2.18 |
| C3         | COMPLEMENT COMPONENT 3                                                           | 1.915E-05  | 0.0012798  | 1.36  | 2.57 |
| C3ORF37    | CHROMOSOME 3 OPEN READING FRAME 37                                               | 3.8041E-05 | 0.0017911  | -1.25 | 0.42 |
| C4ORF27    | CHROMOSOME 4 OPEN READING FRAME 27                                               | 0.00022264 | 0.00039319 | 1.35  | 2.55 |
| C6ORF145   | CHROMOSOME 6 OPEN READING FRAME 145                                              | 0.00069002 | 0.00866176 | -1.03 | 0.49 |
| C7         | COMPLEMENT COMPONENT 7                                                           | 2.0793E-05 | 0.00131211 | -1.36 | 0.39 |
| C7ORF10    | WAS PROTEIN FAMILY HOMOLOG 1                                                     | 0.00062504 | 0.00812439 | 1.36  | 2.57 |
| C7ORF30    | CHROMOSOME 7 OPEN READING FRAME 30                                               | 1.1536E-05 | 0.00096416 | -1.32 | 0.40 |
| C8H9ORF3   | CHROMOSOME 9 OPEN READING FRAME 3 ORTHOLOG                                       | 1.2793E-06 | 0.00031137 | -2.60 | 0.16 |
| C9H6ORF203 | CHROMOSOME 6 OPEN READING FRAME 203 ORTHOLOG                                     | 0.00083894 | 0.00980073 | 1.08  | 2.11 |
| C9ORF23    | CHROMOSOME 9 OPEN READING FRAME 23 ORTHOLOG                                      | 0.00048388 | 0.00703814 | 1.02  | 2.03 |
| C9ORF46    | CHROMOSOME 9 OPEN READING FRAME 46 ORTHOLOG                                      | 1.5063E-06 | 0.00032934 | -1.51 | 0.35 |
| CAD        | CARBAMOYL-PHOSPHATE SYNTHETASE 2, ASPARTATE TRANSCARBAMYLASE, AND DIHYDROOROTASE | 6.7338E-05 | 0.0022989  | 1.10  | 2.14 |
| CAPN3      | CALPAIN 3                                                                        | 0.00318658 | 0.02125121 | -2.22 | 0.21 |
| CASC4      | CANCER SUSCEPTIBILITY CANDIDATE 4                                                | 0.00015593 | 0.00368107 | -1.21 | 0.43 |
| CASP7      | CASPASE 7, APOPTOSIS-RELATED CYSTEINE PEPTIDASE                                  | 0.01125126 | 0.04019022 | 1.31  | 2.48 |
| CAST       | CALPASTATIN                                                                      | 0.00013097 | 0.00330865 | -1.09 | 0.47 |
| CCDC138    | COILED-COIL DOMAIN CONTAINING 13                                                 | 0.00028435 | 0.00514811 | -1.60 | 0.33 |
| CCDC34     | COILED-COIL DOMAIN CONTAINING 34                                                 | 0.01573147 | 0.04778737 | 1.08  | 2.11 |
| CCDC90B    | COILED-COIL DOMAIN CONTAINING 90B                                                | 1.8742E-07 | 0.00013573 | -1.68 | 0.31 |
| CCL4       | CHEMOKINE (C-C MOTIF) LIGAND 4-LIKE 1                                            | 0.00159361 | 0.01452975 | -1.03 | 0.49 |
| CCL5       | CHEMOKINE (C-C MOTIF) LIGAND 5                                                   | 0.00035723 | 0.00585424 | 2.15  | 4.44 |
| CCNA2      | CYCLIN A2                                                                        | 7.4E-05    | 0.00240469 | 2.16  | 4.46 |
| CCNB2      | CYCLIN B2                                                                        | 0.00025443 | 0.00479655 | 1.02  | 2.03 |
| CCND1      | CYCLIN D1                                                                        | 5.6137E-05 | 0.00210943 | -1.25 | 0.42 |
| CCNDBP1    | CYCLIN D-TYPE BINDING-PROTEIN 1                                                  | 2.3205E-05 | 0.00136928 | 1.30  | 2.46 |
| CCNL1      | MINICHROMOSOME MAINTENANCE COMPLEX COMPONENT 2                                   | 4.4134E-05 | 0.00191768 | -1.41 | 0.38 |
| CCNY       | CYCLIN Y                                                                         | 0.00027891 | 0.0050677  | -1.36 | 0.39 |
| CCR7       | CHEMOKINE (C-C MOTIF) RECEPTOR 7                                                 | 3.723E-06  | 0.00051945 | -1.41 | 0.38 |
| CCT3       | CHAPERONIN CONTAINING TCP1, SUBUNIT 3 (GAMMA)                                    | 9.9728E-05 | 0.00284139 | 1.51  | 2.86 |
| CCT8       | CHAPERONIN CONTAINING TCP1 SUBUNIT 8                                             | 4.5841E-06 | 0.00058679 | 1.43  | 2.70 |
| CD109      | CD109 MOLECULE                                                                   | 0.00011211 | 0.0030609  | -1.21 | 0.43 |
| CD2        | CD2 MOLECULE                                                                     | 1.5489E-05 | 0.00116114 | -1.97 | 0.25 |
| CD2AP      | CD2-ASSOCIATED PROTEIN                                                           | 9.7634E-05 | 0.00280765 | -1.02 | 0.49 |
| CD3EAP     | FAMILY WITH SEQUENCE SIMILARITY 76, MEMBER A                                     | 7.1624E-05 | 0.00236795 | -1.17 | 0.44 |
| CD40       | CD40 MOLECULE, TNF RECEPTOR SUPERFAMILY MEMBER 5                                 | 0.0044423  | 0.0253639  | 1.32  | 2.50 |
| CD83       | CD83 MOLECULE                                                                    | 2.9129E-06 | 0.00045085 | -1.95 | 0.26 |
| CD97       | CD97 MOLECULE                                                                    | 0.01485246 | 0.04657241 | 1.02  | 2.03 |
| CDC2       | CYCLIN-DEPENDENT KINASE 1                                                        | 0.0001681  | 0.00384422 | 1.87  | 3.66 |
| CDC20      | CELL DIVISION CYCLE 20 HOMOLOG                                                   | 6.1248E-06 | 0.00063971 | 1.54  | 2.91 |
| CDC42EP5   | CDC42 EFFECTOR PROTEIN (RHO GTPASE BINDING) 5                                    | 0.01546914 | 0.04742557 | -1.02 | 0.49 |
| CDCA3      | CELL DIVISION CYCLE ASSOCIATED 3                                                 | 0.0007534  | 0.00910783 | 1.59  | 3.02 |
| CDCA5      | CELL DIVISION CYCLE ASSOCIATED 5                                                 | 0.00029191 | 0.00520864 | 1.35  | 2.54 |
| CDCA7      | CELL DIVISION CYCLE ASSOCIATED 7                                                 | 0.01599669 | 0.04816051 | 1.13  | 2.18 |
| CDK2AP2    | CYCLIN-DEPENDENT KINASE 2 ASSOCIATED PROTEIN 2                                   | 4.4782E-05 | 0.0019293  | -1.11 | 0.46 |
| CDKN1A     | CYCLIN-DEPENDENT KINASE INHIBITOR 1A (P21)                                       | 1.1538E-05 | 0.00096416 | -3.65 | 0.08 |
| CEACAM1    | CARCINOEMBRYONIC ANTIGEN-RELATED CELL ADHESION MOLECULE 1 (BILIARY GLYCOPROTEIN) | 1.6091E-05 | 0.00118991 | 1.09  | 2.13 |
| CEBPD      | CCAAT/ENHANCER BINDING PROTEIN (C/EBP), DELTA                                    | 5.228E-05  | 0.0020705  | -1.09 | 0.47 |
| CENPF      | CENTROMERE PROTEIN F, 350/400KA                                                  | 0.01350999 | 0.04442763 | 1.16  | 2.23 |
| CHD8       | CHROMODOMAIN HELICASE DNA BINDING PROTEIN 8                                      | 5.1997E-05 | 0.00206467 | 1.21  | 2.32 |
| CHGA       | CHROMOGRANIN A (PARATHYROID SECRETORY PROTEIN 1)                                 | 2.1118E-05 | 0.00131622 | 1.18  | 2.27 |
| CHMP4A     | CHROMATIN MODIFYING PROTEIN 4A                                                   | 9.0426E-06 | 0.00082991 | 1.64  | 3.11 |
| CHORDC1    | CYSTEINE AND HISTIDINE-RICH DOMAIN (CHORD) CONTAINING 1                          | 3.2367E-05 | 0.001662   | 1.25  | 2.38 |
| CHRN1      | CHOLINERGIC RECEPTOR, NICOTINIC, BETA 1                                          | 0.00010252 | 0.00289274 | -1.02 | 0.49 |
| CHST12     | CARBOHYDRATE (CHONDROITIN 4) SULFOTRANSFERASE 12                                 | 1.1029E-05 | 0.00095994 | 1.07  | 2.10 |
| CHST3      | CARBOHYDRATE (CHONDROITIN 6) SULFOTRANSFERASE 3                                  | 7.0695E-05 | 0.00235259 | -1.92 | 0.26 |
| CTF8       | CTF8, CHROMOSOME TRANSMISSION FIDELITY FACTOR 8 HOMOLOG                          | 9.0588E-06 | 0.00082991 | 1.57  | 2.97 |
| CIITA      | DOWNSTREAM NEIGHBOR OF SON                                                       | 2.1085E-05 | 0.00131622 | 1.84  | 3.59 |
| CIRH1A     | CIRRHOUS, AUTOSOMAL RECESSIVE 1A                                                 | 9.9273E-05 | 0.00283787 | 1.64  | 3.13 |
| CISD1      | CDGSH IRON SULFUR DOMAIN 1                                                       | 0.00431915 | 0.02491867 | 1.13  | 2.18 |
| CISH       | CYTOKINE INDUCIBLE SH2-CONTAINING PROTEIN                                        | 5.6098E-05 | 0.00210943 | 1.23  | 2.34 |
| CKAP2L     | CYTOSKELETON ASSOCIATED PROTEIN 2-LIKE                                           | 0.00309791 | 0.02094392 | 1.02  | 2.03 |
| CKS2       | CDC28 PROTEIN KINASE REGULATORY SUBUNIT 2                                        | 0.00694255 | 0.03185948 | 1.14  | 2.20 |

|         |                                                                                     |            |            |       |      |
|---------|-------------------------------------------------------------------------------------|------------|------------|-------|------|
| CLDN4   | CLAUDIN 4                                                                           | 1.1681E-05 | 0.00096546 | -1.02 | 0.49 |
| CLK2    | CDC-LIKE KINASE 2                                                                   | 1.7442E-05 | 0.00124031 | 1.67  | 3.19 |
| CNOT6L  | CCR4-NOT TRANSCRIPTION COMPLEX, SUBUNIT 6-LIKE                                      | 0.00084984 | 0.00989614 | -1.06 | 0.48 |
| COMMD8  | COMM DOMAIN CONTAINING 8                                                            | 6.3003E-05 | 0.00220011 | 1.38  | 2.61 |
| COPB2   | COATOMER PROTEIN COMPLEX, SUBUNIT BETA 2 (BETA PRIME)                               | 0.00181711 | 0.01567475 | 1.21  | 2.31 |
| COPS4   | COP9 CONSTITUTIVE PHOTOMORPHOGENIC HOMOLOG SUBUNIT 4                                | 8.9641E-05 | 0.00269809 | 1.63  | 3.09 |
| CPEB1   | CYTOPLASMIC POLYADENYLATION ELEMENT BINDING PROTEIN 1                               | 1.4554E-05 | 0.00111113 | -1.38 | 0.39 |
| CPSF7   | CLEAVAGE AND POLYADENYLATION SPECIFIC FACTOR 7, 59kDA                               | 0.00032072 | 0.00548977 | 1.02  | 2.03 |
| CSRNP2  | CYSTEINE-SERINE-RICH NUCLEAR PROTEIN 2                                              | 2.9001E-05 | 0.00157057 | -1.49 | 0.36 |
| CTDSP2  | CTD (CARBOXY-TERMINAL DOMAIN, RNA POLYMERASE II, POLYPEPTIDE A) SMALL PHOSPHATASE 2 | 8.4687E-05 | 0.00259663 | 1.12  | 2.17 |
| CTSC    | CATHEPSIN C                                                                         | 3.1714E-05 | 0.00165741 | -1.32 | 0.40 |
| CTSH    | CATHEPSIN H                                                                         | 1.4612E-05 | 0.00111113 | 1.36  | 2.57 |
| CTSZ    | CATHEPSIN Z                                                                         | 7.7233E-05 | 0.0024521  | 1.69  | 3.24 |
| CWF19L1 | CWF19-LIKE 1, CELL CYCLE CONTROL                                                    | 1.9565E-05 | 0.0012798  | 1.01  | 2.01 |
| CXCR4   | CHEMOKINE (C-X-C MOTIF) RECEPTOR 4                                                  | 4.7925E-08 | 7.6385E-05 | -2.02 | 0.25 |
| CXCR6   | CHEMOKINE (C-X-C MOTIF) RECEPTOR 6                                                  | 0.00012119 | 0.00321637 | 1.77  | 3.42 |
| CXCR7   | CHEMOKINE (C-X-C MOTIF) RECEPTOR 7                                                  | 3.2468E-05 | 0.001662   | -3.18 | 0.11 |
| CYBB    | CYTOCHROME B-245, BETA POLYPEPTIDE                                                  | 0.00039811 | 0.00628702 | 1.10  | 2.14 |
| CYP2U1  | CYTOCHROME P450, FAMILY 2, SUBFAMILY U, POLYPEPTIDE 1                               | 0.00066064 | 0.00845706 | -1.01 | 0.50 |
| CYP51A1 | CYTOCHROME P450, FAMILY 51, SUBFAMILY A, POLYPEPTIDE 1                              | 5.4921E-06 | 0.00061869 | -2.15 | 0.23 |
| DAAM1   | DISHEVELLED ASSOCIATED ACTIVATOR OF MORPHOGENESIS 1                                 | 0.01074873 | 0.03918184 | -2.13 | 0.23 |
| DCAF13  | WD REPEATS AND SOF DOMAIN CONTAINING 1                                              | 1.2424E-05 | 0.00099825 | 1.34  | 2.54 |
| DCTN2   | DYNACTIN 2                                                                          | 0.00278953 | 0.01968331 | 1.04  | 2.05 |
| DDC     | DOPA DECARBOXYLASE (AROMATIC L-AMINO ACID DECARBOXYLASE)                            | 0.00061666 | 0.00805683 | -1.09 | 0.47 |
| DDX1    | DEAD (ASP-GLU-ALA-ASP) BOX POLYPEPTIDE 1                                            | 2.8008E-05 | 0.00155412 | 1.06  | 2.09 |
| DDX23   | DEAD (ASP-GLU-ALA-ASP) BOX POLYPEPTIDE 23                                           | 0.00073481 | 0.00900458 | 1.09  | 2.12 |
| DDX39   | DEAD (ASP-GLU-ALA-ASP) BOX POLYPEPTIDE 39A                                          | 0.00025978 | 0.00486549 | 1.28  | 2.43 |
| DDX5    | DEAD (ASP-GLU-ALA-ASP) BOX POLYPEPTIDE 5                                            | 0.00163734 | 0.01469987 | 1.24  | 2.35 |
| DENND4A | DENN/MADD DOMAIN CONTAINING 4A                                                      | 1.6216E-06 | 0.00033494 | -1.93 | 0.26 |
| DGCR2   | DIGEOGE SYNDROME CRITICAL REGION GENE 2                                             | 8.1777E-05 | 0.00254851 | -1.00 | 0.50 |
| DICER1  | DICER 1, RIBONUCLEASE TYPE III                                                      | 0.0002582  | 0.00484177 | 1.05  | 2.07 |
| DLGAP5  | DISCS, LARGE HOMOLOG-ASSOCIATED PROTEIN 5                                           | 0.00081485 | 0.00962502 | 1.16  | 2.23 |
| DLST    | DIHYDROLIPOAMIDE S-SUCCINYLTRANSFERASE (E2 COMPONENT OF 2-OXO-GLUTARATE COMPLEX)    | 0.0005563  | 0.00761572 | 1.13  | 2.18 |
| DNAJA3  | DNAJ (HSP40) HOMOLOG, SUBFAMILY A, MEMBER 3                                         | 0.000331   | 0.00558077 | 1.01  | 2.02 |
| DNAJB9  | DNAJ (HSP40) HOMOLOG, SUBFAMILY B, MEMBER 9                                         | 5.6141E-06 | 0.0006232  | -2.02 | 0.25 |
| DNAJC14 | DNAJ (HSP40) HOMOLOG, SUBFAMILY C, MEMBER 14                                        | 3.3027E-05 | 0.00166314 | 1.33  | 2.52 |
| DNASE2  | DEOXYRIBONUCLEASE II                                                                | 2.1843E-05 | 0.00133945 | 1.43  | 2.69 |
| DPCD    | DELETED IN PRIMARY CILIARY DYSKINESIA HOMOLOG                                       | 0.0004284  | 0.00654782 | 1.17  | 2.25 |
| DPF2    | D4, ZINC AND DOUBLE PHD FINGERS FAMILY 2                                            | 0.00056046 | 0.00761764 | 1.19  | 2.28 |
| DUSP11  | DUAL SPECIFICITY PHOSPHATASE 11 (RNA/RNP COMPLEX 1-INTERACTING)                     | 0.0001037  | 0.00291498 | -1.67 | 0.32 |
| DUSP3   | DUAL SPECIFICITY PHOSPHATASE 3                                                      | 1.1153E-06 | 0.00028749 | -1.48 | 0.36 |
| DUSP5   | DUAL SPECIFICITY PHOSPHATASE 5                                                      | 7.3181E-07 | 0.00023125 | -2.47 | 0.18 |
| EAPP    | E2F-ASSOCIATED PHOSPHOPROTEIN                                                       | 1.804E-05  | 0.00124703 | 1.06  | 2.08 |
| EIF1AD  | EUKARYOTIC TRANSLATION INITIATION FACTOR 1A DOMAIN CONTAINING                       | 5.7863E-05 | 0.00212187 | 1.18  | 2.27 |
| EIF2AK2 | EUKARYOTIC TRANSLATION INITIATION FACTOR 2-ALPHA KINASE 2                           | 1.1895E-05 | 0.00097783 | 1.54  | 2.91 |
| EIF2AK3 | EUKARYOTIC TRANSLATION INITIATION FACTOR 2-ALPHA KINASE 3                           | 7.5067E-06 | 0.00073242 | -2.20 | 0.22 |
| EIF2B3  | EUKARYOTIC TRANSLATION INITIATION FACTOR 2B, SUBUNIT 3 GAMMA, 58kDA                 | 0.00489721 | 0.02665597 | 1.18  | 2.26 |
| EIF2B4  | EUKARYOTIC TRANSLATION INITIATION FACTOR 2B, SUBUNIT 4 DELTA, 67kDA                 | 8.3786E-05 | 0.00258388 | 1.20  | 2.30 |
| EIF4A1  | EUKARYOTIC TRANSLATION INITIATION FACTOR 4A ISOFORM 1                               | 0.00055173 | 0.00760025 | -1.19 | 0.44 |
| ELOF1   | ELONGATION FACTOR 1 HOMOLOG                                                         | 2.5716E-05 | 0.00146414 | 1.12  | 2.18 |
| ELOVL4  | ELONGATION OF VERY LONG CHAIN FATTY ACIDS (FEN1/ELO2, SUR4/ELO3)-LIKE 4             | 0.00062703 | 0.00812943 | -1.19 | 0.44 |
| EMD     | EMERIN                                                                              | 3.6518E-05 | 0.00175749 | -1.24 | 0.42 |
| EMILIN2 | ELASTIN MICROFIBRIL INTERFACER 2                                                    | 0.00041281 | 0.00640818 | -1.08 | 0.47 |
| ERRFI1  | ERBB RECEPTOR FEEDBACK INHIBITOR 1                                                  | 1.0761E-06 | 0.00028376 | -2.78 | 0.15 |
| ESPL1   | EXTRA SPINDLE POLE BODIES HOMOLOG 1                                                 | 0.00793326 | 0.03403499 | 1.06  | 2.08 |
| ETV3    | ETS VARIANT 3                                                                       | 1.8349E-06 | 0.00035323 | -1.77 | 0.29 |
| EXOC6   | COBL-LIKE 1                                                                         | 0.00090906 | 0.01033901 | -1.03 | 0.49 |
| EXOSC10 | EXOSOME COMPONENT 10                                                                | 1.2472E-05 | 0.00099825 | -2.02 | 0.25 |
| EXOSC7  | EXOSOME COMPONENT 7                                                                 | 0.00022524 | 0.00441416 | 1.16  | 2.24 |
| EXOSC9  | EXOSOME COMPONENT 9                                                                 | 6.5889E-07 | 0.00023125 | 1.59  | 3.02 |
| FADS3   | FATTY ACID DESATURASE 3                                                             | 1.1121E-05 | 0.00095994 | 1.34  | 2.54 |
| FAM100B | FAMILY WITH SEQUENCE SIMILARITY 100, MEMBER B; PREDICTED GENE 7367                  | 0.00135835 | 0.01314941 | 1.10  | 2.15 |
| FAM149A | FAMILY WITH SEQUENCE SIMILARITY 149, MEMBER A                                       | 0.00238228 | 0.01815473 | -1.57 | 0.34 |
| FAM33A  | SPINDLE AND KINETOCHORE ASSOCIATED COMPLEX SUBUNIT 2                                | 0.00079622 | 0.00948228 | -1.22 | 0.43 |

|           |                                                                                                     |            |            |       |      |
|-----------|-----------------------------------------------------------------------------------------------------|------------|------------|-------|------|
| FAM49A    | FAMILY WITH SEQUENCE SIMILARITY 49, MEMBER A                                                        | 0.00196662 | 0.01635062 | -1.01 | 0.50 |
| FAM53C    | FAMILY WITH SEQUENCE SIMILARITY 3, MEMBER C                                                         | 0.000138   | 0.00344623 | -1.11 | 0.46 |
| FAM58A    | FAMILY WITH SEQUENCE SIMILARITY 13, MEMBER A                                                        | 1.8299E-05 | 0.00125924 | 1.22  | 2.33 |
| FAM83D    | FAMILY WITH SEQUENCE SIMILARITY 83, MEMBER D                                                        | 0.00046454 | 0.00685893 | -2.01 | 0.25 |
| FARSA     | PHENYLALANYL-TRNA SYNTHETASE, ALPHA SUBUNIT                                                         | 5.3702E-05 | 0.00209535 | 1.25  | 2.38 |
| FBP1      | FRUCTOSE-1,6-BISPHOSPHATASE 1                                                                       | 0.00013589 | 0.00340458 | -1.23 | 0.43 |
| FBXO33    | F-BOX PROTEIN 33                                                                                    | 0.00056684 | 0.00766945 | -1.16 | 0.45 |
| FCER1A    | FC FRAGMENT OF IGE, HIGH AFFINITY I, RECEPTOR FOR; ALPHA POLYPEPTIDE                                | 0.00012184 | 0.00321637 | -2.44 | 0.18 |
| FCER2     | FC FRAGMENT OF IGE, LOW AFFINITY II, RECEPTOR FOR (CD23)                                            | 1.559E-06  | 0.00033394 | -1.77 | 0.29 |
| FCGR2B    | FC FRAGMENT OF IGG, LOW AFFINITY IIB, RECEPTOR (CD32)                                               | 0.00023626 | 0.00457127 | 1.86  | 3.62 |
| FH        | FUMARATE HYDRATASE                                                                                  | 0.00017367 | 0.00391291 | 1.51  | 2.84 |
| FIZ1      | FLT3-INTERACTING ZINC FINGER 1                                                                      | 0.00309862 | 0.02094392 | -1.01 | 0.50 |
| FKBP4     | FK506 BINDING PROTEIN 4, 59KDA                                                                      | 1.4492E-05 | 0.00111113 | 1.93  | 3.82 |
| FKBP4     | FK506 BINDING PROTEIN 4, 59KDA                                                                      | 1.4492E-05 | 0.00111113 | 1.93  | 3.82 |
| FNDC3B    | FIBRONECTIN TYPE III DOMAIN CONTAINING 3B                                                           | 0.00095576 | 0.010624   | -1.07 | 0.48 |
| FOS       | C-FOS PROTEIN                                                                                       | 9.529E-06  | 0.0008626  | -1.45 | 0.37 |
| FOSL2     | FOS-LIKE ANTIGEN 2                                                                                  | 7.5045E-09 | 2.5141E-05 | -4.45 | 0.05 |
| FRAT2     | FREQUENTLY REARRANGED IN ADVANCED T-CELL LYMPHOMAS 2                                                | 0.00031729 | 0.00544829 | -1.02 | 0.49 |
| FXYD6     | FXYD DOMAIN CONTAINING ION TRANSPORT REGULATOR 6                                                    | 4.5684E-05 | 0.00194628 | 2.12  | 4.35 |
| GADD45A   | GROWTH ARREST AND DNA-DAMAGE-INDUCIBLE, ALPHA                                                       | 2.7152E-07 | 0.00014747 | -2.28 | 0.21 |
| GADD45B   | GROWTH ARREST AND DNA-DAMAGE-INDUCIBLE, BETA                                                        | 4.0898E-05 | 0.00185662 | -1.58 | 0.33 |
| GALK1     | GALACTOKINASE 1                                                                                     | 0.00041793 | 0.0064396  | 1.12  | 2.18 |
| GALNT3    | UDP-N-ACETYL-ALPHA-D-GALACTOSAMINE:POLYPEPTIDE N-ACETYLGALACTOSAMINYLTRANSFERASE 3 (GALNAC-T3)      | 2.332E-05  | 0.00136928 | -1.06 | 0.48 |
| GAPT      | GRB2-BINDING ADAPTOR PROTEIN, TRANSMEMBRANE                                                         | 1.107E-05  | 0.00095994 | 1.47  | 2.77 |
| GARS      | GLYCYL-TRNA SYNTHETASE                                                                              | 8.5275E-05 | 0.00260414 | 1.52  | 2.87 |
| GCLC      | GLUTAMATE-CYSTEINE LIGASE, CATALYTIC SUBUNIT                                                        | 0.00038786 | 0.00620255 | 1.45  | 2.73 |
| GDE1      | GLYCEROPHOSPHODIESTER PHOSPHODIESTERASE 1                                                           | 0.0015174  | 0.01408361 | 1.01  | 2.02 |
| GEM       | GTP BINDING PROTEIN OVEREXPRESSED IN SKELETAL MUSCLE                                                | 2.7043E-06 | 0.00044604 | -2.01 | 0.25 |
| GEMIN7    | GEM (NUCLEAR ORGANELLE) ASSOCIATED PROTEIN 7                                                        | 1.4983E-05 | 0.00113365 | 1.06  | 2.09 |
| GFM1      | G ELONGATION FACTOR, MITOCHONDRIAL 1                                                                | 3.9862E-06 | 0.00053721 | 1.44  | 2.72 |
| GH2       | GROWTH HORMONE 2                                                                                    | 0.00082018 | 0.00965424 | -1.43 | 0.37 |
| GLTPD1    | GLYCOLIPID TRANSFER PROTEIN DOMAIN CONTAINING 1                                                     | 0.00020474 | 0.0042536  | -1.00 | 0.50 |
| GLUL      | GLUTAMATE-AMMONIA LIGASE                                                                            | 0.00115268 | 0.01186243 | -1.23 | 0.43 |
| GMFG      | GLIA MATURATION FACTOR, GAMMA                                                                       | 0.00017609 | 0.00393223 | 1.13  | 2.18 |
| GNE       | GLUCOSAMINE (UDP-N-ACETYL)-2-EPIMERASE/N-ACETYLMANNOSAMINE KINASE                                   | 0.00030288 | 0.00531861 | -1.26 | 0.42 |
| GNL3      | GUANINE NUCLEOTIDE BINDING PROTEIN-LIKE 3 (NUCLEOLAR)                                               | 0.00020591 | 0.00427211 | 1.38  | 2.61 |
| GOLGB1    | GOLGIN B1, GOLGI INTEGRAL MEMBRANE PROTEIN; SIMILAR TO GIANTIN                                      | 0.00070242 | 0.00872748 | -1.02 | 0.49 |
| GOSR2     | GOLGI SNAP RECEPTOR COMPLEX MEMBER 2                                                                | 4.7618E-05 | 0.00196787 | 1.05  | 2.08 |
| GPR171    | G PROTEIN-COUPLED RECEPTOR 171                                                                      | 2.3224E-05 | 0.00136928 | -1.80 | 0.29 |
| GPR98     | G PROTEIN-COUPLED RECEPTOR 98                                                                       | 4.2166E-06 | 0.00055576 | -2.56 | 0.17 |
| GRASP     | GRP1 (GENERAL RECEPTOR FOR PHOSPHOINOSITIDES 1)-ASSOCIATED SCAFFOLD PROTEIN                         | 5.6512E-05 | 0.00211198 | -1.46 | 0.36 |
| GSN       | GELSOLIN (AMYLOIDOSIS, FINNISH TYPE)                                                                | 4.9069E-06 | 0.00060556 | -1.40 | 0.38 |
| GSTZ1     | GLUTATHIONE TRANSFERASE ZETA 1                                                                      | 6.7651E-05 | 0.0022989  | -1.05 | 0.48 |
| GUCY1B3   | GUANYLATE CYCLASE 1, SOLUBLE, BETA 3                                                                | 4.2999E-07 | 0.00019517 | -5.14 | 0.03 |
| GZMB      | GRANZYME B (GRANZYME 2, CYTOTOXIC T-LYMPHOCYTE-ASSOCIATED SERINE ESTERASE 1)                        | 1.9763E-05 | 0.0012798  | 1.54  | 2.91 |
| GZMH      | GRANZYME H (CATHEPSIN G-LIKE 2, PROTEIN H-CCPX)                                                     | 5.5971E-06 | 0.0006232  | 2.14  | 4.42 |
| HBA1      | HEMOGLOBIN, ALPHA 1                                                                                 | 0.0002035  | 0.0042454  | -1.49 | 0.36 |
| HCLS1     | HEMATOPOIETIC CELL-SPECIFIC LYN SUBSTRATE 1                                                         | 0.0002936  | 0.00521613 | 1.64  | 3.11 |
| HEATR6    | HEAT REPEAT CONTAINING 6                                                                            | 2.4333E-05 | 0.00140708 | 1.05  | 2.07 |
| HERC1     | HECT (HOMOLOGOUS TO THE E6-AP (UBE3A) CARBOXYL TERMINUS) DOMAIN AND RCC1 (CHC1)-LIKE DOMAIN (RLD) 1 | 2.9209E-05 | 0.00157522 | 1.22  | 2.34 |
| HERPUD1   | HOMOCYSTEINE-INDUCIBLE, ENDOPLASMIC RETICULUM STRESS-INDUCIBLE, UBIQUITIN-LIKE DOMAIN MEMBER 1      | 5.8181E-05 | 0.00212187 | -1.92 | 0.26 |
| HHEX      | HEMATOPOIETICALLY EXPRESSED HOMEBOX                                                                 | 0.00040569 | 0.00635381 | 1.15  | 2.21 |
| HIGD1A    | HIG1 HYPOXIA INDUCIBLE DOMAIN FAMILY, MEMBER 1A                                                     | 0.00010395 | 0.00291665 | -1.68 | 0.31 |
| HIRIP3    | HIRA INTERACTING PROTEIN 3                                                                          | 0.00011288 | 0.00307646 | 1.02  | 2.03 |
| HKR1      | HKR1, GLI-KRUPPEL ZINC FINGER FAMILY MEMBER                                                         | 0.00019956 | 0.00420349 | 2.87  | 7.31 |
| HLA-B     | MAJOR HISTOCOMPATIBILITY COMPLEX, CLASS I, B                                                        | 0.00110268 | 0.01161645 | 2.33  | 5.03 |
| HLA-C     | MAJOR HISTOCOMPATIBILITY COMPLEX, CLASS I, C; MAJOR HISTOCOMPATIBILITY COMPLEX, CLASS I, B          | 0.00028536 | 0.00516017 | 2.43  | 5.38 |
| HLA-DRB1  | MAJOR HISTOCOMPATIBILITY COMPLEX, CLASS II, DR BETA 1                                               | 0.00373511 | 0.02306273 | 1.15  | 2.22 |
| HMGA1     | HIGH MOBILITY GROUP AT-HOOK 1                                                                       | 3.2239E-05 | 0.001662   | 1.68  | 3.21 |
| HMGCR     | 3-HYDROXY-3-METHYLGLUTARYL-COENZYME A REDUCTASE                                                     | 1.304E-06  | 0.00031137 | -1.87 | 0.27 |
| HNRNPA2B1 | HETEROGENEOUS NUCLEAR RIBONUCLEOPROTEIN A2/B1                                                       | 0.00044237 | 0.00668083 | -1.08 | 0.47 |
| HNRNPK    | HETEROGENEOUS NUCLEAR RIBONUCLEOPROTEIN K                                                           | 0.00154856 | 0.01424711 | -1.06 | 0.48 |

|              |                                                                                                                               |            |            |       |       |
|--------------|-------------------------------------------------------------------------------------------------------------------------------|------------|------------|-------|-------|
| HNRNPU       | HETEROGENEOUS NUCLEAR RIBONUCLEOPROTEIN U                                                                                     | 0.00012513 | 0.00323088 | 1.14  | 2.20  |
| HOMEZ        | HOMEBOX AND LEUCINE ZIPPER ENCODING                                                                                           | 4.5688E-05 | 0.00194628 | 1.10  | 2.15  |
| HPS3         | HERMANSKY-PUDLAK SYNDROME 3                                                                                                   | 3.5873E-06 | 0.00051468 | -1.58 | 0.33  |
| HRSP12       | HEAT-RESPONSIVE PROTEIN 12                                                                                                    | 3.6047E-05 | 0.00174585 | -1.47 | 0.36  |
| HSP90AA2     | HEAT SHOCK PROTEIN 90kDA ALPHA (CYTOSOLIC), CLASS A MEMBER 2;<br>HEAT SHOCK PROTEIN 90kDA ALPHA (CYTOSOLIC), CLASS A MEMBER 1 | 1.0822E-06 | 0.00028376 | 2.64  | 6.25  |
| HSP90AB1     | HEAT SHOCK 90kDA PROTEIN 1, BETA                                                                                              | 1.8015E-05 | 0.00124703 | 2.23  | 4.69  |
| HSPA5        | HEAT SHOCK 70kDA PROTEIN 5 (GLUCOSE-REGULATED PROTEIN, 78kDA)                                                                 | 0.00020079 | 0.00420598 | -1.56 | 0.34  |
| HSPA9        | HEAT SHOCK PROTEIN 9                                                                                                          | 0.0001081  | 0.0030032  | -1.06 | 0.48  |
| HSPB1        | HEAT SHOCK 27kDA PROTEIN 1                                                                                                    | 1.5872E-07 | 0.00012069 | 4.32  | 19.93 |
| HSPD1        | HEAT SHOCK 60kDA PROTEIN 1 (CHAPERONIN)                                                                                       | 6.7386E-05 | 0.0022989  | 1.72  | 3.30  |
| HSPE1        | HEAT SHOCK 10kDA PROTEIN 1 (CHAPERONIN 10)                                                                                    | 0.00056034 | 0.00761764 | 1.14  | 2.21  |
| HSPH1        | HEAT SHOCK 105kDA/110kDA PROTEIN 1                                                                                            | 1.3757E-06 | 0.00031699 | 1.82  | 3.53  |
| HTRA2        | HTRA SERINE PEPTIDASE 2                                                                                                       | 7.513E-06  | 0.00073242 | 1.17  | 2.25  |
| HYAL1        | HYALURONOGLUCOSAMINIDASE 1                                                                                                    | 1.5308E-07 | 0.00012069 | -2.26 | 0.21  |
| HYAL2        | HYALURONOGLUCOSAMINIDASE 2                                                                                                    | 4.4627E-07 | 0.00019517 | -2.71 | 0.15  |
| IARS2        | ISOLEUCYL-TRNA SYNTHETASE 2, MITOCHONDRIAL                                                                                    | 1.7761E-05 | 0.00124703 | 1.19  | 2.28  |
| ID2          | INHIBITOR OF DNA BINDING 2, DOMINANT NEGATIVE HELIX-LOOP-HELIX PROTEIN                                                        | 1.9881E-05 | 0.0012798  | -2.10 | 0.23  |
| IER3         | IMMEDIATE EARLY RESPONSE 3                                                                                                    | 0.00012571 | 0.00324044 | -2.12 | 0.23  |
| IFITM1       | INTERFERON INDUCED TRANSMEMBRANE PROTEIN 1 (9-27)                                                                             | 0.00166391 | 0.01483021 | 1.42  | 2.67  |
| IFITM3       | INTERFERON INDUCED TRANSMEMBRANE PROTEIN 3 (1-8U)                                                                             | 0.00501668 | 0.02693984 | 1.16  | 2.24  |
| IFRD1        | INTERFERON-RELATED DEVELOPMENTAL REGULATOR 1                                                                                  | 8.921E-06  | 0.00082726 | -1.25 | 0.42  |
| IGE          | IMMUNOGLOBULIN E                                                                                                              | 0.00011888 | 0.00318846 | -2.98 | 0.13  |
| IGH@         | IMMUNOGLOBULIN HEAVY LOCUS                                                                                                    | 0.00900659 | 0.03606135 | 1.07  | 2.10  |
| IGLL1        | IMMUNOGLOBULIN LAMBDA VARIABLE GROUP                                                                                          | 0.00711519 | 0.03225272 | 1.44  | 2.71  |
| IL16         | INTERLEUKIN 16 (LYMPHOCYTE CHEMOATTRACTANT FACTOR)                                                                            | 0.00055    | 0.00759703 | 1.32  | 2.50  |
| IL18BP       | INTERLEUKIN 18 BINDING PROTEIN                                                                                                | 7.3563E-06 | 0.00072646 | 1.39  | 2.62  |
| IL2RG        | INTERLEUKIN 2 RECEPTOR, GAMMA                                                                                                 | 0.00385527 | 0.02347115 | 1.06  | 2.09  |
| IL32         | INTERLEUKIN 32                                                                                                                | 0.00091013 | 0.01033901 | 1.08  | 2.12  |
| IMP4         | IMP4, U3 SMALL NUCLEOLAR RIBONUCLEOPROTEIN, HOMOLOG                                                                           | 3.7061E-05 | 0.0017724  | 1.07  | 2.10  |
| IRF2         | INTERFERON REGULATORY FACTOR 2                                                                                                | 0.00033535 | 0.00562908 | 1.01  | 2.01  |
| IRF5         | INTERFERON REGULATORY FACTOR 5                                                                                                | 0.00159986 | 0.01455186 | 1.24  | 2.36  |
| ITFG1        | INTEGRIN ALPHA FG-GAP REPEAT CONTAINING 1                                                                                     | 0.00082704 | 0.0097088  | -1.05 | 0.48  |
| ITGA5        | INTEGRIN, ALPHA 5 (FIBRONECTIN RECEPTOR, ALPHA POLYPEPTIDE)                                                                   | 6.4357E-07 | 0.00023125 | -2.18 | 0.22  |
| ITM2B        | INTEGRAL MEMBRANE PROTEIN 2B                                                                                                  | 0.00021346 | 0.00434007 | -1.03 | 0.49  |
| JAG1         | JAGGED 1                                                                                                                      | 0.0005794  | 0.00774981 | -1.94 | 0.26  |
| JMJD1C       | JUMONJI DOMAIN CONTAINING 1C                                                                                                  | 0.00036742 | 0.005948   | -1.12 | 0.46  |
| JOSD1        | JOSEPHIN DOMAIN CONTAINING 1                                                                                                  | 2.6144E-06 | 0.00044178 | -1.57 | 0.34  |
| JUND         | JUN D PROTO-ONCOGENE                                                                                                          | 9.0803E-07 | 0.00026055 | -1.67 | 0.32  |
| KCNA3        | POTASSIUM VOLTAGE-GATED CHANNEL, SHAKER-RELATED SUBFAMILY, MEMBER 3                                                           | 0.00010626 | 0.00297598 | -1.28 | 0.41  |
| KDR          | KINASE INSERT DOMAIN RECEPTOR (A TYPE III RECEPTOR TYROSINE KINASE)                                                           | 4.3467E-05 | 0.00189413 | -1.77 | 0.29  |
| KIAA0101     | KIAA0101                                                                                                                      | 0.00867439 | 0.03553884 | 1.20  | 2.29  |
| KIAA1967     | KIAA1967                                                                                                                      | 0.00029055 | 0.00520864 | 1.14  | 2.21  |
| KLF10        | KRUPPEL-LIKE FACTOR 10                                                                                                        | 0.00085134 | 0.00990321 | -1.05 | 0.48  |
| KLF3         | KRUPPEL-LIKE FACTOR 3                                                                                                         | 0.00022272 | 0.00439319 | -1.16 | 0.45  |
| KLF4         | KRUPPEL-LIKE FACTOR 4                                                                                                         | 1.6833E-05 | 0.00121327 | -1.63 | 0.32  |
| KLHDC3       | KELCH DOMAIN CONTAINING 3                                                                                                     | 3.9238E-06 | 0.00053721 | 1.26  | 2.39  |
| KPNA2        | KARYOPHERIN ALPHA 2                                                                                                           | 0.00014828 | 0.00358923 | 1.44  | 2.72  |
| KYNU         | KYNURENINASE                                                                                                                  | 4.13E-05   | 0.00186933 | 1.14  | 2.20  |
| LAMP2        | LYSOSOMAL-ASSOCIATED MEMBRANE PROTEIN 2                                                                                       | 6.0078E-05 | 0.00214228 | 1.24  | 2.36  |
| LDHA         | LACTATE DEHYDROGENASE A                                                                                                       | 2.9349E-06 | 0.00045085 | -1.90 | 0.27  |
| LGALS1       | LECTIN, GALACTOSIDE-BINDING, SOLUBLE, 1                                                                                       | 2.3976E-07 | 0.00014662 | 3.09  | 8.50  |
| LIMA1        | LIM DOMAIN AND ACTIN-BINDING PROTEIN 1                                                                                        | 4.6676E-05 | 0.00195549 | -1.42 | 0.37  |
| LINS1        | LINES HOMOLOG                                                                                                                 | 6.9815E-05 | 0.00233351 | 1.35  | 2.54  |
| LIPA         | LYSOSOMAL ACID LIPASE A                                                                                                       | 5.9997E-05 | 0.00214228 | 2.48  | 5.58  |
| LITAF        | SET AND MYND DOMAIN CONTAINING 2                                                                                              | 8.8973E-06 | 0.00082726 | 1.44  | 2.71  |
| LOC100626076 | 0                                                                                                                             | 0.00032793 | 0.00553519 | -2.27 | 0.21  |
| LOC508070    | 0                                                                                                                             | 0.01691646 | 0.04943989 | -1.05 | 0.48  |
| LOC510193    | APOLIPOPROTEIN L, 3-LIKE                                                                                                      | 1.7781E-06 | 0.00034669 | -1.42 | 0.37  |
| LOC750761    | 0                                                                                                                             | 0.00021507 | 0.00436095 | -1.28 | 0.41  |
| LONP2        | LON PEPTIDASE 2, PEROXISOMAL                                                                                                  | 0.00015965 | 0.00372389 | 1.31  | 2.48  |
| LRRC25       | LEUCINE RICH REPEAT CONTAINING 25                                                                                             | 0.00017505 | 0.00392058 | 1.15  | 2.22  |
| LY6E         | LYMPHOCYTE ANTIGEN 6 COMPLEX, LOCUS E                                                                                         | 0.00105689 | 0.01135916 | 1.13  | 2.20  |
| LYST         | LYSOSOMAL TRAFFICKING REGULATOR                                                                                               | 6.7896E-06 | 0.00068783 | 1.75  | 3.35  |
| LZIC         | LEUCINE ZIPPER AND CTNNBIP1 DOMAIN CONTAINING                                                                                 | 7.6346E-06 | 0.00073953 | 1.19  | 2.28  |
| MAN1C1       | MANNOSIDASE, ALPHA, CLASS 1C, MEMBER 1                                                                                        | 0.009167   | 0.03636197 | -1.09 | 0.47  |
| MAP3K2       | MITOGEN-ACTIVATED PROTEIN KINASE KINASE KINASE 2                                                                              | 0.00010822 | 0.0030032  | -2.15 | 0.23  |

|         |                                                                                   |            |            |       |      |
|---------|-----------------------------------------------------------------------------------|------------|------------|-------|------|
| MAP7D1  | MAP7 DOMAIN CONTAINING 1                                                          | 6.8294E-06 | 0.00068783 | 1.07  | 2.09 |
| MARS    | METHIONYL-TRNA SYNTHETASE                                                         | 0.00065516 | 0.00839396 | 1.21  | 2.31 |
| MAZ     | MYC-ASSOCIATED ZINC FINGER PROTEIN (PURINE-BINDING TRANSCRIPTION FACTOR)          | 6.578E-06  | 0.0006714  | 1.38  | 2.61 |
| MCM3    | MINICHROMOSOME MAINTENANCE COMPLEX COMPONENT 3                                    | 0.00019677 | 0.00417939 | 1.07  | 2.10 |
| MDC1    | MEDIATOR OF DNA-DAMAGE CHECKPOINT 1                                               | 0.0001098  | 0.00303597 | 1.13  | 2.19 |
| MED1    | MEDIATOR COMPLEX SUBUNIT 1                                                        | 3.8191E-05 | 0.00179263 | 1.09  | 2.12 |
| MED25   | SPI-B TRANSCRIPTION FACTOR (SPI-1/PU.1 RELATED)                                   | 0.00068863 | 0.00866176 | -1.15 | 0.45 |
| MED30   | MEDIATOR COMPLEX SUBUNIT 30                                                       | 0.00026451 | 0.00490588 | -1.01 | 0.50 |
| MED8    | MEDIATOR COMPLEX SUBUNIT 8                                                        | 1.0414E-05 | 0.0009208  | 1.25  | 2.37 |
| METTL12 | METHYLTRANSFERASE LIKE 12                                                         | 4.243E-05  | 0.00188274 | 1.11  | 2.16 |
| MICAL1  | MICROTUBULE ASSOCIATED MONOOXYGENASE, CALPONIN AND LIM DOMAIN CONTAINING 1        | 0.00941607 | 0.03690829 | 1.03  | 2.05 |
| MIER2   | MESODERM INDUCTION EARLY RESPONSE 1, FAMILY MEMBER 2                              | 0.00117576 | 0.01204107 | -1.04 | 0.49 |
| MIF     | MACROPHAGE MIGRATION INHIBITORY FACTOR (GLYCOSYLATION-INHIBITING FACTOR)          | 0.00136242 | 0.01318045 | 1.06  | 2.08 |
| MKNK2   | MAP KINASE INTERACTING SERINE/THREONINE KINASE 2                                  | 2.0424E-05 | 0.00129965 | -1.89 | 0.27 |
| MORF4L1 | UBIQUITIN SPECIFIC PEPTIDASE 15                                                   | 4.2039E-05 | 0.00188274 | -1.13 | 0.46 |
| MOV10   | MOV10L1, MOLONEY LEUKEMIA VIRUS 10-LIKE 1, HOMOLOG                                | 0.00333975 | 0.02187379 | 1.13  | 2.18 |
| MOXD1   | MONOOXYGENASE, DBH-LIKE 1                                                         | 5.9605E-05 | 0.00214228 | -1.38 | 0.38 |
| MPP1    | MEMBRANE PROTEIN, PALMITOYLATED 1, 55KDA                                          | 0.000345   | 0.00574671 | 1.10  | 2.15 |
| MPRIIP  | MYOSIN PHOSPHATASE RHO INTERACTING PROTEIN                                        | 9.4316E-05 | 0.00276369 | 1.09  | 2.13 |
| MPZL1   | MYELIN PROTEIN ZERO-LIKE 1                                                        | 3.0769E-05 | 0.00161358 | -1.64 | 0.32 |
| MRPL2   | MITOCHONDRIAL RIBOSOMAL PROTEIN L2                                                | 0.00023245 | 0.00451169 | 1.24  | 2.37 |
| MRPL28  | MITOCHONDRIAL RIBOSOMAL PROTEIN L28                                               | 0.00012859 | 0.00327578 | 1.10  | 2.15 |
| MRPL45  | MITOCHONDRIAL RIBOSOMAL PROTEIN L45                                               | 0.00010951 | 0.00303365 | 1.24  | 2.36 |
| MRPL48  | MITOCHONDRIAL RIBOSOMAL PROTEIN L48                                               | 5.9505E-06 | 0.00063971 | 1.11  | 2.16 |
| MRPL51  | MITOCHONDRIAL RIBOSOMAL PROTEIN L51                                               | 0.0003597  | 0.00587211 | 1.29  | 2.45 |
| MRPS11  | MITOCHONDRIAL RIBOSOMAL PROTEIN S11                                               | 1.2122E-05 | 0.00098586 | 1.01  | 2.01 |
| MRPS12  | MITOCHONDRIAL RIBOSOMAL PROTEIN S12                                               | 3.6287E-05 | 0.00175191 | 1.09  | 2.13 |
| MRPS5   | MITOCHONDRIAL RIBOSOMAL PROTEIN S5                                                | 0.00048639 | 0.00703814 | 1.08  | 2.11 |
| MRRF    | MITOCHONDRIAL RIBOSOME RECYCLING FACTOR                                           | 9.2668E-06 | 0.00084389 | 1.54  | 2.92 |
| MSH6    | MUTS HOMOLOG 6                                                                    | 0.00330492 | 0.0217685  | 1.07  | 2.10 |
| MT1A    | METALLOTHIONEIN 1A                                                                | 1.452E-05  | 0.00111113 | 1.17  | 2.25 |
| MT2A    | METALLOTHIONEIN 2A                                                                | 0.00013318 | 0.00334774 | 1.65  | 3.14 |
| MTCH2   | MITOCHONDRIAL CARRIER HOMOLOG 2                                                   | 2.0087E-06 | 0.00037861 | 1.90  | 3.74 |
| MTMR9   | MYOTUBULARIN RELATED PROTEIN 9                                                    | 0.00023837 | 0.00460051 | -1.04 | 0.49 |
| MT-ND3  | NADH DEHYDROGENASE (UBIQUINONE) FE-S PROTEIN 1, 75KDA (NADH-COENZYME Q REDUCTASE) | 1.3701E-06 | 0.00031699 | -1.46 | 0.36 |
| MX2     | MYXOVIRUS (INFLUENZA VIRUS) RESISTANCE 2                                          | 0.00538416 | 0.02786058 | 2.01  | 4.03 |
| MYBL2   | V-MYB MYELOBLASTOSIS VIRAL ONCOGENE HOMOLOG LIKE 2                                | 0.00022394 | 0.00441145 | 1.52  | 2.87 |
| MYC     | TRANSCRIPTION FACTOR PROTEIN                                                      | 0.00020643 | 0.00427423 | 2.02  | 4.05 |
| MYL6    | MYOSIN, LIGHT CHAIN 6B, ALKALI, SMOOTH MUSCLE AND NON-MUSCLE                      | 0.00106108 | 0.01137092 | 1.51  | 2.84 |
| MYLIP   | MYOSIN REGULATORY LIGHT CHAIN INTERACTING PROTEIN                                 | 0.00012267 | 0.00321637 | -1.36 | 0.39 |
| MYOF    | MYOFERLIN                                                                         | 0.00887405 | 0.03594315 | 1.67  | 3.18 |
| MYST1   | MYST HISTONE ACETYLTRANSFERASE 1                                                  | 4.2287E-05 | 0.00188274 | 1.05  | 2.07 |
| N6AMT2  | N-6 ADENINE-SPECIFIC DNA METHYLTRANSFERASE 2 (PUTATIVE)                           | 5.0182E-06 | 0.00060556 | 1.27  | 2.42 |
| NAA10   | N(ALPHA)-ACETYLTRANSFERASE 10, NATA CATALYTIC SUBUNIT                             | 5.9204E-05 | 0.00214228 | 1.04  | 2.06 |
| NAP1L5  | NUCLEOSOME ASSEMBLY PROTEIN 1-LIKE 5                                              | 3.2551E-06 | 0.00048533 | -2.51 | 0.18 |
| NARF    | NUCLEAR PRELAMIN A RECOGNITION FACTOR                                             | 0.00102578 | 0.01114256 | -1.12 | 0.46 |
| NCAPH   | NON-SMC CONDENSIN I COMPLEX, SUBUNIT H                                            | 0.00025452 | 0.00479655 | 1.05  | 2.06 |
| NCF1    | NEUTROPHIL CYTOSOLIC FACTOR 1                                                     | 0.00042333 | 0.00648344 | 1.01  | 2.02 |
| NCF4    | NEUTROPHIL CYTOSOLIC FACTOR 4, 40KDA                                              | 0.00017237 | 0.00389722 | 1.23  | 2.34 |
| NCOA2   | NUCLEAR RECEPTOR COACTIVATOR 2                                                    | 3.3545E-05 | 0.00166717 | -1.73 | 0.30 |
| NCOA3   | NUCLEAR RECEPTOR COACTIVATOR 3                                                    | 0.01052306 | 0.0387308  | -1.12 | 0.46 |
| NCS1    | NEURONAL CALCIUM SENSOR 1                                                         | 0.00566765 | 0.02868031 | -1.40 | 0.38 |
| NDE1    | EXTERNAL NADH-UBIQUINONE OXIDOREDUCTASE 1, MITOCHONDRIAL                          | 0.00251992 | 0.01863048 | 1.10  | 2.14 |
| NDEL1   | NUDE NUCLEAR DISTRIBUTION GENE E HOMOLOG LIKE 1                                   | 7.5346E-07 | 0.00023125 | -2.77 | 0.15 |
| NDNL2   | NECDIN-LIKE 2                                                                     | 2.5667E-07 | 0.00014662 | -4.06 | 0.06 |
| NDRG1   | N-MYC DOWNSTREAM REGULATED 1                                                      | 0.0031844  | 0.0212498  | -1.16 | 0.45 |
| NDUFAF4 | MITOCHONDRIALLY ENCODED NADH DEHYDROGENASE 1                                      | 0.01509473 | 0.04693531 | 1.02  | 2.03 |
| NDUFS2  | HYPOTHETICAL PROTEIN MGC130896                                                    | 0.00181333 | 0.01565989 | 1.15  | 2.21 |
| NEDD4L  | NEDD4 PROTEIN                                                                     | 0.000143   | 0.0035152  | -1.07 | 0.47 |
| NEDD9   | NEURAL PRECURSOR CELL EXPRESSED, DEVELOPMENTALLY DOWN-REGULATED GENE 9            | 4.999E-06  | 0.00060556 | -1.25 | 0.42 |
| NFIL3   | NUCLEAR FACTOR, INTERLEUKIN 3 REGULATED                                           | 0.00033219 | 0.00558851 | -1.21 | 0.43 |
| NGDN    | NEUROGUIDIN, EIF4E BINDING PROTEIN                                                | 0.00037355 | 0.00601795 | 1.17  | 2.25 |
| NGFRAP1 | NERVE GROWTH FACTOR RECEPTOR (TNFRSF16) ASSOCIATED PROTEIN 1                      | 4.6495E-05 | 0.0019533  | -1.74 | 0.30 |
| NGRN    | NEUGRIN, NEURITE OUTGROWTH ASSOCIATED                                             | 1.7535E-05 | 0.00124031 | 1.57  | 2.96 |
| NKG7    | NATURAL KILLER CELL GROUP 7 SEQUENCE                                              | 0.00726356 | 0.0325662  | 1.16  | 2.24 |



|         |                                                                                                                       |            |            |       |      |
|---------|-----------------------------------------------------------------------------------------------------------------------|------------|------------|-------|------|
| NLRC5   | NLR FAMILY, CARD DOMAIN CONTAINING 5                                                                                  | 0.0021645  | 0.01723443 | 1.41  | 2.66 |
| NME6    | NON-METASTATIC CELLS 1, PROTEIN (NM23A) EXPRESSED IN                                                                  | 2.1224E-05 | 0.00131745 | 1.09  | 2.13 |
| NOP56   | NOP56 RIBONUCLEOPROTEIN HOMOLOG                                                                                       | 0.00552359 | 0.02820558 | 1.24  | 2.36 |
| NPC2    | NIEMANN-PICK DISEASE, TYPE C2                                                                                         | 0.00011951 | 0.00319414 | -1.17 | 0.44 |
| NPM3    | NUCLEOPHOSMIN/NUCLEOPLASMIN 3                                                                                         | 7.4894E-05 | 0.00242856 | 1.59  | 3.01 |
| NQO2    | NAD(P)H DEHYDROGENASE, QUINONE 2                                                                                      | 0.00110298 | 0.01161645 | -1.28 | 0.41 |
| NR4A1   | NUCLEAR RECEPTOR SUBFAMILY 4, GROUP A, MEMBER 1                                                                       | 4.7746E-07 | 0.00019517 | -2.36 | 0.19 |
| NRD1    | NARDILYSIN, N-ARGININE DIBASIC CONVERTASE, NRD CONVERTASE 1                                                           | 7.6028E-07 | 0.00023125 | -1.62 | 0.32 |
| NTHL1   | NTH ENDONUCLEASE III-LIKE 1                                                                                           | 0.00070164 | 0.00872488 | 1.02  | 2.03 |
| NUCB2   | NUCLEOBINDIN 2                                                                                                        | 3.6868E-05 | 0.00176872 | -1.42 | 0.37 |
| NUDC    | NUCLEAR DISTRIBUTION GENE C HOMOLOG                                                                                   | 0.00069378 | 0.00866969 | 1.15  | 2.22 |
| NUDT5   | NUDIX (NUCLEOSIDE DIPHOSPHATE LINKED MOIETY X)-TYPE MOTIF 6                                                           | 0.00053641 | 0.00747051 | 1.27  | 2.40 |
| NUP85   | NUCLEOPORIN 85KDA                                                                                                     | 7.0583E-05 | 0.00235259 | 1.42  | 2.68 |
| NUP98   | NUCLEOPORIN 98KDA                                                                                                     | 9.7836E-05 | 0.00280765 | -1.09 | 0.47 |
| NXF1    | NUCLEAR RNA EXPORT FACTOR 1                                                                                           | 0.00042053 | 0.00645353 | 1.23  | 2.34 |
| OGDH    | OXOGLUTARATE (ALPHA-KETOGLUTARATE) DEHYDROGENASE (LIPOAMIDE)                                                          | 5.8816E-06 | 0.00063971 | -1.89 | 0.27 |
| Ogt     | O-LINKED N-ACETYLGUCOSAMINE (GLCNAC) TRANSFERASE (UDP-N-ACETYLGUCOSAMINE:POLYPEPTIDE-N-ACETYLGUCOSAMINYL TRANSFERASE) | 0.00183401 | 0.01576687 | 1.11  | 2.16 |
| OR3A1   | OLFACTORY RECEPTOR, FAMILY 3, SUBFAMILY A, MEMBER 1                                                                   | 0.00097425 | 0.0107599  | 1.20  | 2.30 |
| ORMDL3  | ORM1-LIKE 3                                                                                                           | 1.371E-05  | 0.00107862 | -1.35 | 0.39 |
| OSTN    | OSTEOCRIN                                                                                                             | 4.2069E-06 | 0.00055576 | -2.20 | 0.22 |
| OXCT1   | 3-OXOACID COA TRANSFERASE 1                                                                                           | 0.00020896 | 0.00429392 | 1.07  | 2.10 |
| P4HA2   | PROLYL 4-HYDROXYLASE, ALPHA POLYPEPTIDE II                                                                            | 0.00034384 | 0.00573995 | 1.55  | 2.93 |
| P4HB    | PROCOLLAGEN-PROLINE, 2-OXOGLUTARATE 4-DIOXYGENASE (PROLINE 4-HYDROXYLASE), BETA POLYPEPTIDE                           | 0.00015154 | 0.00364335 | -1.29 | 0.41 |
| PA2G4   | PROLIFERATION-ASSOCIATED 2G4, 38KDA                                                                                   | 0.001034   | 0.01119223 | 1.14  | 2.20 |
| PACRG   | HIGH MOBILITY GROUP BOX 1                                                                                             | 2.9343E-05 | 0.00157684 | 1.13  | 2.18 |
| PACS1   | PHOSPHOFURIN ACIDIC CLUSTER SORTING PROTEIN 1                                                                         | 0.00021133 | 0.00431395 | -1.10 | 0.47 |
| PAF1    | RTF1, PAF1/RNA POLYMERASE II COMPLEX COMPONENT, HOMOLOG                                                               | 0.00019658 | 0.00417939 | -1.19 | 0.44 |
| PALLD   | PALLADIN, CYTOSKELETAL ASSOCIATED PROTEIN                                                                             | 0.00048038 | 0.00700547 | -1.05 | 0.48 |
| PAPOLA  | POLY (A) POLYMERASE ALPHA                                                                                             | 1.6219E-05 | 0.00119156 | 1.01  | 2.02 |
| PCYOX1  | PRENYLCYSTEINE OXIDASE 1                                                                                              | 6.015E-05  | 0.00214228 | 1.04  | 2.05 |
| PDE4B   | PHOSPHODIESTERASE 4B, CAMP-SPECIFIC                                                                                   | 3.345E-09  | 1.6957E-05 | -3.85 | 0.07 |
| PDEA    | PHOSPHODIESTERASE 7A                                                                                                  | 2.5689E-07 | 0.00014662 | -2.86 | 0.14 |
| PDHB    | PYRUVATE DEHYDROGENASE E1 COMPONENT SUBUNIT BETA                                                                      | 8.2715E-05 | 0.00256706 | 1.21  | 2.31 |
| PER1    | PERIOD HOMOLOG 1                                                                                                      | 1.6475E-06 | 0.00033494 | -2.38 | 0.19 |
| PFDN2   | PREFOLDIN SUBUNIT 2                                                                                                   | 0.0168611  | 0.04937193 | -1.74 | 0.30 |
| PGM3    | PHOSPHOGLUCOMUTASE 3                                                                                                  | 1.7534E-05 | 0.00124031 | -1.90 | 0.27 |
| PHACTR1 | PHOSPHATASE AND ACTIN REGULATOR 1                                                                                     | 0.00039227 | 0.00622844 | -1.04 | 0.48 |
| PHKG2   | PHOSPHORYLASE KINASE, GAMMA 2                                                                                         | 2.2717E-05 | 0.00136015 | -1.57 | 0.34 |
| PIAS1   | PROTEIN INHIBITOR OF ACTIVATED STAT, 1                                                                                | 0.00012012 | 0.00319919 | 1.01  | 2.01 |
| PICALM  | PHOSPHATIDYLINOSITOL BINDING CLATHRIN ASSEMBLY PROTEIN                                                                | 8.8352E-05 | 0.00267289 | -1.04 | 0.49 |
| PIK3R1  | PHOSPHOINOSITIDE-3-KINASE, REGULATORY SUBUNIT 1 (ALPHA)                                                               | 3.7906E-05 | 0.00179031 | -1.28 | 0.41 |
| PIN1    | PEPTIDYLPROLYL CIS/TRANS ISOMERASE, NIMA-INTERACTING 1                                                                | 9.0646E-05 | 0.00270302 | 1.00  | 2.00 |
| PITPNA  | PHOSPHATIDYLINOSITOL TRANSFER PROTEIN, ALPHA                                                                          | 0.00015525 | 0.00368011 | 1.17  | 2.24 |
| PITX3   | PAIRED-LIKE HOMEODOMAIN TRANSCRIPTION FACTOR 3                                                                        | 0.00140934 | 0.01348848 | -1.25 | 0.42 |
| PKD2    | POLYCYSTIC KIDNEY DISEASE 2                                                                                           | 0.01109061 | 0.03987954 | -1.02 | 0.49 |
| PKM2    | PYRUVATE KINASE, MUSCLE                                                                                               | 0.00332833 | 0.02184356 | 1.15  | 2.22 |
| PLAGL1  | PLEIOMORPHIC ADENOMA GENE-LIKE 1                                                                                      | 7.2414E-06 | 0.00072452 | -1.40 | 0.38 |
| PLCB2   | PHOSPHOLIPASE C, BETA 2                                                                                               | 5.4324E-06 | 0.00061869 | -1.24 | 0.42 |
| PLDN    | PALLIDIN HOMOLOG                                                                                                      | 0.00061723 | 0.0080574  | 1.01  | 2.02 |
| PLK2    | POLO-LIKE KINASE 2                                                                                                    | 1.1415E-05 | 0.00096416 | -1.54 | 0.34 |
| PLOD1   | PROCOLLAGEN-LYSINE 1, 2-OXOGLUTARATE 5-DIOXYGENASE 1                                                                  | 6.8809E-08 | 8.3038E-05 | 2.19  | 4.55 |
| PLXNC1  | PLEXIN C1                                                                                                             | 7.3607E-05 | 0.00239718 | 1.49  | 2.81 |
| POMT2   | PROTEIN-O-MANNOSYLTRANSFERASE 2                                                                                       | 2.4792E-05 | 0.00142281 | -1.03 | 0.49 |
| PPM1M   | PROTEIN PHOSPHATASE, MG2+/MN2+ DEPENDENT, 1M                                                                          | 0.00019132 | 0.00410954 | 1.17  | 2.25 |
| PPRC1   | PEROXISOME PROLIFERATOR-ACTIVATED RECEPTOR GAMMA, COACTIVATOR-RELATED 1                                               | 0.00023063 | 0.00450109 | 1.16  | 2.23 |
| PRC1    | PROTEASOME C9 1                                                                                                       | 0.00175856 | 0.0153174  | 1.38  | 2.61 |
| PRMT5   | SIMILAR TO PROTEIN ARGININE N-METHYLTRANSFERASE 5 (PREDICTED)                                                         | 5.1755E-05 | 0.00206467 | 1.78  | 3.45 |
| PRNP    | PRION PROTEIN                                                                                                         | 0.00083573 | 0.00978586 | -1.21 | 0.43 |
| PSAP    | PROSAPOSIN                                                                                                            | 4.9359E-05 | 0.00200581 | -1.10 | 0.47 |
| PSMB3   | PROTEASOME (PROSOME, MACROPAIN) SUBUNIT, BETA TYPE, 3                                                                 | 4.9848E-05 | 0.00201619 | 1.00  | 2.00 |
| PSMB8   | PROTEASOME (PROSOME, MACROPAIN) SUBUNIT, BETA TYPE, 8 (LARGE MULTIFUNCTIONAL PEPTIDASE 7)                             | 0.00016071 | 0.00373373 | 1.29  | 2.44 |
| PSMC5   | PROTEASOME (PROSOME, MACROPAIN) 26S SUBUNIT, NON-ATPASE, 5                                                            | 0.00090531 | 0.01032085 | 1.06  | 2.09 |
| PSMG1   | PROTEASOME (PROSOME, MACROPAIN) ASSEMBLY CHAPERONE 1                                                                  | 0.00012382 | 0.00322997 | 1.16  | 2.23 |
| PSPH    | PHOSPHOSERINE PHOSPHATASE                                                                                             | 1.37E-05   | 0.00107862 | 1.09  | 2.13 |
| PTCD3   | PENTATRICOPEPTIDE REPEAT DOMAIN 3                                                                                     | 0.00030872 | 0.00537794 | 1.03  | 2.04 |

|           |                                                                                                                                                  |            |            |       |      |
|-----------|--------------------------------------------------------------------------------------------------------------------------------------------------|------------|------------|-------|------|
| PTGER4    | PROSTAGLANDIN RECEPTOR EP4 SUBTYPE                                                                                                               | 0.0008424  | 0.00981699 | -1.14 | 0.46 |
| PTGS2     | CYCLOOXYGENASE-2                                                                                                                                 | 1.8726E-05 | 0.0012798  | -1.22 | 0.43 |
| PTOV1     | PROSTATE TUMOR OVEREXPRESSED 1                                                                                                                   | 9.9173E-07 | 0.00027528 | 1.76  | 3.38 |
| PTPMT1    | PROTEIN TYROSINE PHOSPHATASE, MITOCHONDRIAL 1                                                                                                    | 0.00073786 | 0.00900458 | 1.00  | 2.00 |
| PTPN2     | PROTEIN TYROSINE PHOSPHATASE, NON-RECEPTOR TYPE 2                                                                                                | 2.4901E-05 | 0.00142368 | -1.23 | 0.43 |
| PUS3      | PSEUDOURIDYLATE SYNTHASE 3                                                                                                                       | 1.9399E-05 | 0.0012798  | 1.37  | 2.58 |
| RAB11FIP3 | RAB11 FAMILY INTERACTING PROTEIN 3 (CLASS II)                                                                                                    | 0.00236998 | 0.01813925 | -1.15 | 0.45 |
| RAB1B     | RAB1B, MEMBER RAS ONCOGENE FAMILY                                                                                                                | 0.01117911 | 0.0400688  | -1.13 | 0.46 |
| RAB32     | RAB40C, MEMBER RAS ONCOGENE FAMILY                                                                                                               | 6.5785E-05 | 0.00228413 | 1.23  | 2.34 |
| RAB3GAP1  | GUANYLATE BINDING PROTEIN 2, INTERFERON-INDUCIBLE                                                                                                | 0.00040509 | 0.00635381 | -1.61 | 0.33 |
| RAB40B    | RAB40C, MEMBER RAS ONCOGENE FAMILY                                                                                                               | 0.00026103 | 0.00487093 | -1.05 | 0.48 |
| RAB43     | RAB43, MEMBER RAS ONCOGENE FAMILY                                                                                                                | 0.00268434 | 0.01928698 | -1.05 | 0.48 |
| RAB7A     | RAB7A, MEMBER RAS ONCOGENE FAMILY                                                                                                                | 3.6872E-06 | 0.00051945 | -1.44 | 0.37 |
| RABEPK    | Rab9 EFFECTOR PROTEIN WITH KELCH MOTIFS                                                                                                          | 2.0521E-05 | 0.00130036 | 1.27  | 2.41 |
| RAD51L1   | RAD51-LIKE 1                                                                                                                                     | 0.00656285 | 0.03107808 | -1.44 | 0.37 |
| RANBP2    | RAN BINDING PROTEIN 2                                                                                                                            | 3.7196E-06 | 0.00051945 | -2.67 | 0.16 |
| RASSF2    | RAS ASSOCIATION (RALGDS/AF-6) DOMAIN FAMILY MEMBER 2                                                                                             | 0.007575   | 0.03323384 | 1.05  | 2.07 |
| RASSF5    | RAS ASSOCIATION (RALGDS/AF-6) DOMAIN FAMILY MEMBER 5                                                                                             | 0.00015536 | 0.00368011 | -1.34 | 0.39 |
| RB1       | RETINOBLASTOMA 1                                                                                                                                 | 0.00045981 | 0.00683554 | 1.07  | 2.10 |
| RBM3      | RNA BINDING MOTIF (RNP1, RRM) PROTEIN 3                                                                                                          | 4.1923E-05 | 0.00188274 | -1.85 | 0.28 |
| RBM48     | CHROMOSOME 7 OPEN READING FRAME 64 ORTHOLOG                                                                                                      | 6.064E-05  | 0.00214568 | 1.29  | 2.45 |
| RDX       | RADIXIN                                                                                                                                          | 0.00036529 | 0.00592882 | 1.06  | 2.09 |
| REG3G     | REGENERATING ISLET-DERIVED 3 GAMMA                                                                                                               | 0.01686203 | 0.04937193 | -1.05 | 0.48 |
| RFC2      | REPLICATION FACTOR C (ACTIVATOR 1) 2, 40kDA                                                                                                      | 0.00015758 | 0.00369818 | 1.51  | 2.86 |
| RFC3      | REPLICATION FACTOR C (ACTIVATOR 1) 3, 38kDA                                                                                                      | 3.233E-05  | 0.001662   | 1.41  | 2.66 |
| RGAG4     | RETROTRANSPOSON GAG DOMAIN CONTAINING 4                                                                                                          | 2.2019E-05 | 0.00133947 | -1.05 | 0.48 |
| RGMB      | RGM DOMAIN FAMILY, MEMBER B                                                                                                                      | 0.00014153 | 0.00349415 | -1.28 | 0.41 |
| RGS1      | REGULATOR OF G-PROTEIN SIGNALING 1                                                                                                               | 0.0001948  | 0.00415889 | -1.04 | 0.48 |
| RGS2      | REGULATOR OF G-PROTEIN SIGNALING 2, 24kDA                                                                                                        | 0.0065981  | 0.03115277 | -2.05 | 0.24 |
| RHOF      | RAS HOMOLOG GENE FAMILY, MEMBER F                                                                                                                | 0.00020036 | 0.00420598 | 1.21  | 2.32 |
| RHOT2     | FAMILY WITH SEQUENCE SIMILARITY 195, MEMBER A                                                                                                    | 0.00019501 | 0.00415889 | 1.21  | 2.31 |
| RNF113A   | RING FINGER PROTEIN 113A                                                                                                                         | 2.3886E-05 | 0.00139177 | 1.38  | 2.60 |
| RNF144B   | RING FINGER PROTEIN 144B                                                                                                                         | 4.529E-05  | 0.00194568 | -1.18 | 0.44 |
| RNF19A    | RING FINGER PROTEIN 19A                                                                                                                          | 0.00072976 | 0.00896459 | 1.04  | 2.06 |
| RNMT      | RNA (GUANINE-7-) METHYLTRANSFERASE                                                                                                               | 0.0001563  | 0.00368107 | 1.03  | 2.05 |
| ROBLD3    | LATE ENDOSOMAL/LYSOSOMAL ADAPTOR, MAPK AND MTOR ACTIVATOR 2                                                                                      | 0.00045056 | 0.0067442  | 1.33  | 2.51 |
| RPL10     | RIBOSOMAL PROTEIN L10                                                                                                                            | 0.00611479 | 0.02998938 | -1.30 | 0.41 |
| RPL5      | 60S RIBOSOMAL PROTEIN L5-B                                                                                                                       | 0.00046841 | 0.00688936 | 1.18  | 2.26 |
| RPS24     | RIBOSOMAL PROTEIN S24                                                                                                                            | 1.124E-05  | 0.00095994 | -1.49 | 0.36 |
| RPS6KA6   | RIBOSOMAL PROTEIN S6 KINASE, 90kDA, POLYPEPTIDE 6                                                                                                | 7.7167E-06 | 0.00074276 | -1.46 | 0.36 |
| RRM2      | RIBONUCLEOTIDE REDUCTASE M2                                                                                                                      | 0.001617   | 0.01464966 | 1.28  | 2.42 |
| RRP7A     | RIBOSOMAL RNA PROCESSING 7 HOMOLOG A                                                                                                             | 0.00465841 | 0.0259126  | -1.38 | 0.38 |
| RTP4      | RECEPTOR (CHEMOSENSORY) TRANSPORTER PROTEIN 4                                                                                                    | 1.1659E-05 | 0.00096546 | 2.23  | 4.68 |
| RUFY3     | RUN AND FYVE DOMAIN CONTAINING 3                                                                                                                 | 2.8103E-05 | 0.00155412 | 1.21  | 2.31 |
| RUNX2     | RUNT RELATED TRANSCRIPTION FACTOR 2                                                                                                              | 2.8375E-05 | 0.00155786 | 1.02  | 2.03 |
| RYBP      | RING1 AND YY1 BINDING PROTEIN                                                                                                                    | 2.7276E-06 | 0.00044604 | -1.57 | 0.34 |
| SACM1L    | SAC1 SUPPRESSOR OF ACTIN MUTATIONS 1-LIKE                                                                                                        | 8.8878E-06 | 0.00082726 | -1.54 | 0.34 |
| SAMHD1    | SAM DOMAIN AND HD DOMAIN 1                                                                                                                       | 1.7666E-06 | 0.00034669 | 1.56  | 2.95 |
| SAMSN1    | SAM DOMAIN, SH3 DOMAIN AND NUCLEAR LOCALIZATION SIGNALS 1                                                                                        | 2.8861E-05 | 0.00157057 | -1.20 | 0.44 |
| SAP30BP   | SIMILAR TO TRANSCRIPTIONAL REGULATOR PROTEIN; SAP30 BINDING PROTEIN                                                                              | 0.00028639 | 0.00517277 | 1.21  | 2.31 |
| SC5DL     | STEROL-C5-DESATURASE (ERG3 DELTA-5-DESATURASE HOMOLOG)-LIKE                                                                                      | 0.00170306 | 0.01504806 | -1.09 | 0.47 |
| SCARB2    | SCAVENGER RECEPTOR CLASS B, MEMBER 2                                                                                                             | 0.00653204 | 0.03101446 | -1.18 | 0.44 |
| SCNM1     | SODIUM CHANNEL MODIFIER 1                                                                                                                        | 0.00012482 | 0.00323088 | 1.01  | 2.01 |
| SDC4      | SYNDECAN 4                                                                                                                                       | 4.3142E-05 | 0.00189079 | -1.13 | 0.46 |
| SDF2L1    | STROMAL CELL-DERIVED FACTOR 2-LIKE 1                                                                                                             | 0.00024517 | 0.00468999 | -1.08 | 0.47 |
| SDHAF1    | SUCCINATE DEHYDROGENASE COMPLEX ASSEMBLY FACTOR 1                                                                                                | 0.00013062 | 0.00330865 | 1.24  | 2.36 |
| SDHAF2    | SUCCINATE DEHYDROGENASE COMPLEX ASSEMBLY FACTOR 1                                                                                                | 6.1151E-05 | 0.00215039 | 1.14  | 2.21 |
| SDHC      | SUCCINATE DEHYDROGENASE COMPLEX, SUBUNIT C, INTEGRAL MEMBRANE PROTEIN, 15kDA                                                                     | 0.00029249 | 0.00520864 | 1.13  | 2.18 |
| SEC11C    | SEC11 HOMOLOG C                                                                                                                                  | 0.00317406 | 0.02120877 | -1.47 | 0.36 |
| SEC24D    | SEC24 FAMILY, MEMBER D                                                                                                                           | 0.00018644 | 0.00407297 | -1.41 | 0.38 |
| SEC61A1   | SEC61 ALPHA 2 SUBUNIT                                                                                                                            | 0.00268393 | 0.01928698 | -1.30 | 0.41 |
| SEC61G    | SEC61 GAMMA SUBUNIT                                                                                                                              | 0.00027287 | 0.00498774 | -1.08 | 0.47 |
| SELENBP1  | SELENIUM BINDING PROTEIN 1                                                                                                                       | 8.9771E-05 | 0.00269809 | -1.60 | 0.33 |
| SELK      | SELENOPROTEIN K                                                                                                                                  | 2.7601E-06 | 0.00044654 | -1.67 | 0.31 |
| SEMA4D    | HYPOTHETICAL PROTEIN LOC738112; SEMA DOMAIN, IMMUNOGLOBULIN DOMAIN (IG), TRANSMEMBRANE DOMAIN (TM) AND SHORT CYTOPLASMIC DOMAIN, (SEMAPHORIN) 4D | 0.00274875 | 0.01949769 | -1.00 | 0.50 |
| SEPHS1    | SELENOPHOSPHATE SYNTHETASE 1                                                                                                                     | 7.1225E-05 | 0.00236505 | 1.22  | 2.33 |

|          |                                                                                                                |            |            |       |      |
|----------|----------------------------------------------------------------------------------------------------------------|------------|------------|-------|------|
| SEPX1    | SELENOPROTEIN X, 1                                                                                             | 0.00019523 | 0.00415889 | 1.14  | 2.21 |
| SERPINB1 | SERPIN PEPTIDASE INHIBITOR, CLADE B, MEMBER 1                                                                  | 0.01152665 | 0.04075733 | -1.10 | 0.47 |
| SERPINB2 | SERPIN PEPTIDASE INHIBITOR, CLADE B, MEMBER 2                                                                  | 3.5314E-07 | 0.00017902 | -2.53 | 0.17 |
| SERPINE1 | SERPIN PEPTIDASE INHIBITOR, CLADE E (NEXIN, PLASMINOGEN ACTIVATOR INHIBITOR TYPE 1), MEMBER 1                  | 0.00107971 | 0.01146944 | -1.27 | 0.41 |
| SERTAD1  | SERTA DOMAIN CONTAINING 1                                                                                      | 0.00118291 | 0.01207361 | -1.07 | 0.48 |
| SF3B1    | SPLICING FACTOR 3B, SUBUNIT 1, 155kDA                                                                          | 0.0001691  | 0.00385554 | -1.09 | 0.47 |
| SFRS5    | HYPOTHETICAL PROTEIN MGC78772                                                                                  | 6.3516E-06 | 0.00065267 | -1.59 | 0.33 |
| SFXN4    | SIDEROFLEXIN 4                                                                                                 | 0.0002728  | 0.00498774 | 1.01  | 2.02 |
| SGCE     | SARCOGLYCAN, EPSILON                                                                                           | 1.3104E-06 | 0.00031137 | -2.08 | 0.24 |
| SGPP1    | SPHINGOSINE-1-PHOSPHATE PHOSPHATASE 1                                                                          | 0.00017104 | 0.00388825 | -1.19 | 0.44 |
| SH2B1    | SH2B ADAPTOR PROTEIN 1                                                                                         | 5.6176E-05 | 0.00210943 | 1.15  | 2.22 |
| SHISA5   | SHISA HOMOLOG 5                                                                                                | 1.6534E-05 | 0.0012032  | 1.07  | 2.10 |
| SIRPA    | SIGNAL-REGULATORY PROTEIN ALPHA                                                                                | 0.00039235 | 0.00622844 | -1.03 | 0.49 |
| SIRT7    | SIRTUIN 7                                                                                                      | 0.00011502 | 0.00310708 | 1.11  | 2.15 |
| SKA1     | SPINDLE AND KINETOCHORE ASSOCIATED COMPLEX SUBUNIT 1                                                           | 0.00057162 | 0.0077042  | 1.01  | 2.02 |
| Skp2     | S-PHASE KINASE-ASSOCIATED PROTEIN 2 (P45)                                                                      | 0.00309779 | 0.02094392 | 1.01  | 2.02 |
| SLAIN1   | SLAIN MOTIF FAMILY, MEMBER 1                                                                                   | 0.00206486 | 0.01683792 | -1.30 | 0.41 |
| SLC15A4  | SOLUTE CARRIER FAMILY 15, MEMBER 4                                                                             | 0.00012197 | 0.00321637 | 1.27  | 2.41 |
| SLC25A28 | SOLUTE CARRIER FAMILY 25, MEMBER 28                                                                            | 0.0007972  | 0.00948652 | -1.20 | 0.44 |
| SLC29A1  | SOLUTE CARRIER FAMILY 29 (NUCLEOSIDE TRANSPORTERS), MEMBER 1                                                   | 3.2567E-05 | 0.001662   | 1.03  | 2.04 |
| SLC2A1   | SOLUTE CARRIER FAMILY 2 (FACILITATED GLUCOSE TRANSPORTER), MEMBER 1                                            | 1.1103E-07 | 0.00011256 | -2.84 | 0.14 |
| SLC2A3   | SOLUTE CARRIER FAMILY 2 (FACILITATED GLUCOSE TRANSPORTER), MEMBER 3                                            | 4.0851E-07 | 0.00019517 | -3.97 | 0.06 |
| SLC39A10 | SOLUTE CARRIER FAMILY 39 (ZINC TRANSPORTER), MEMBER 10                                                         | 2.4127E-07 | 0.00014662 | 1.92  | 3.78 |
| SLC44A4  | SOLUTE CARRIER FAMILY 44, MEMBER 4                                                                             | 0.01674803 | 0.04917065 | -1.41 | 0.38 |
| SLC4A1AP | SOLUTE CARRIER FAMILY 4 (ANION EXCHANGER), MEMBER 1, ADAPTOR PROTEIN                                           | 6.897E-05  | 0.00231209 | 1.02  | 2.03 |
| SLC4A7   | SOLUTE CARRIER FAMILY 4, SODIUM BICARBONATE COTRANSPORTER, MEMBER 7                                            | 2.1012E-05 | 0.00131622 | -1.65 | 0.32 |
| SLC6A5   | NEUROEPITHELIAL CELL TRANSFORMING 1                                                                            | 0.00024056 | 0.00461928 | -1.21 | 0.43 |
| SLC7A1   | SOLUTE CARRIER FAMILY 7 (CATIONIC AMINO ACID TRANSPORTER, Y+ SYSTEM), MEMBER 1                                 | 3.9249E-08 | 7.4613E-05 | -2.76 | 0.15 |
| SLC9A3R1 | SOLUTE CARRIER FAMILY 9 (SODIUM/HYDROGEN EXCHANGER), MEMBER 3 REGULATOR 1                                      | 0.00010667 | 0.00297867 | -1.29 | 0.41 |
| SLPI     | SECRETORY LEUKOCYTE PEPTIDASE INHIBITOR                                                                        | 0.00383173 | 0.02340282 | -1.90 | 0.27 |
| SNAI1    | SNAIL HOMOLOG 1                                                                                                | 6.1062E-06 | 0.00063971 | -1.63 | 0.32 |
| SNAP25   | SYNAPTOSOMAL-ASSOCIATED PROTEIN, 25kDA                                                                         | 0.00026313 | 0.00489799 | -1.54 | 0.34 |
| SNAPC3   | SMALL NUCLEAR RNA ACTIVATING COMPLEX, POLYPEPTIDE 3, 50kDA                                                     | 0.00016787 | 0.00384422 | 1.13  | 2.19 |
| SNHG12   | SMALL NUCLEOLAR RNA HOST GENE 12 (NON-PROTEIN CODING)                                                          | 0.0002088  | 0.00429392 | -1.13 | 0.46 |
| SNRK     | SNF RELATED KINASE                                                                                             | 1.0195E-08 | 2.5842E-05 | -3.71 | 0.08 |
| SNRPA1   | SMALL NUCLEAR RIBONUCLEOPROTEIN POLYPEPTIDE A                                                                  | 0.00024188 | 0.00463281 | 1.26  | 2.40 |
| SNRPN    | SMALL NUCLEAR RIBONUCLEOPROTEIN POLYPEPTIDE N                                                                  | 0.00013876 | 0.00345951 | 1.02  | 2.03 |
| SNUPN    | SNURPORTIN 1                                                                                                   | 2.2252E-05 | 0.00134292 | 1.26  | 2.40 |
| SOCS2    | SUPPRESSOR OF CYTOKINE SIGNALING 2                                                                             | 2.9274E-06 | 0.00045085 | -1.90 | 0.27 |
| SOCS3    | SUPPRESSOR OF CYTOKINE SIGNALING 3                                                                             | 4.704E-05  | 0.00195678 | 1.59  | 3.02 |
| SOD1     | SUPEROXIDE DISMUTASE                                                                                           | 0.00049665 | 0.00713223 | -1.01 | 0.49 |
| SP100    | SP100 NUCLEAR ANTIGEN                                                                                          | 0.00019526 | 0.00415889 | 1.12  | 2.18 |
| SPATA20  | SPERMATOGENESIS ASSOCIATED 20                                                                                  | 0.00057496 | 0.00772846 | 1.03  | 2.04 |
| SPEG     | SPEG COMPLEX LOCUS                                                                                             | 2.0414E-06 | 0.00037861 | 3.30  | 9.85 |
| SPINT2   | SERINE PEPTIDASE INHIBITOR, KUNITZ TYPE, 2                                                                     | 0.00012243 | 0.00321637 | -1.16 | 0.45 |
| SPP1     | SECRETED PHOSPHOPROTEIN 1                                                                                      | 4.8766E-07 | 0.00019517 | -2.10 | 0.23 |
| SQLE     | SQUALENE EPOXIDASE                                                                                             | 1.7114E-05 | 0.00122766 | -1.77 | 0.29 |
| SQSTM1   | SEQUESTOSOME 1                                                                                                 | 0.00012831 | 0.00327401 | -2.23 | 0.21 |
| SRRM1    | SERINE/ARGININE REPETITIVE MATRIX 1                                                                            | 0.00842108 | 0.03509668 | -1.06 | 0.48 |
| SSR1     | SIGNAL SEQUENCE RECEPTOR, ALPHA (TRANSLOCON-ASSOCIATED PROTEIN ALPHA)                                          | 6.1075E-06 | 0.00063971 | -1.61 | 0.33 |
| ST3GAL2  | ST6 BETA-GALACTOSAMIDE ALPHA-2,6-SIALYLTRANSFERASE 2                                                           | 0.00071028 | 0.00877778 | -1.19 | 0.44 |
| ST6      | ST6 (ALPHA-N-ACETYL-NEURAMINYL-2,3-BETA-GALACTOSYL-1,3)-N-ACETYL GALACTOSAMINIDE ALPHA-2,6-SIALYLTRANSFERASE 2 | 0.00038852 | 0.00620646 | 1.51  | 2.86 |
| STAT4    | SIGNAL TRANSDUCER AND ACTIVATOR OF TRANSCRIPTION 1                                                             | 0.00250701 | 0.01858023 | -1.27 | 0.41 |
| STIP1    | STRESS-INDUCED-PHOSPHOPROTEIN 1;                                                                               | 0.00019031 | 0.00410286 | 1.44  | 2.71 |
| STK17A   | SERINE/THREONINE KINASE 17A                                                                                    | 3.9916E-06 | 0.00053721 | -1.69 | 0.31 |
| STOML2   | STOMATIN (EPB72)-LIKE 2                                                                                        | 2.6014E-05 | 0.00147072 | 1.36  | 2.57 |
| STUB1    | STIP1 HOMOLOGY AND U-BOX CONTAINING PROTEIN 1, E3 UBIQUITIN PROTEIN LIGASE                                     | 0.00069811 | 0.00869193 | 1.27  | 2.41 |
| STX11    | SYNTAXIN 11                                                                                                    | 0.00018213 | 0.00402265 | -1.37 | 0.39 |
| SYTL2    | SYNAPTOTAGMIN-LIKE 2                                                                                           | 0.00850368 | 0.03520935 | -1.12 | 0.46 |
| TAC1     | TACHYKININ 1                                                                                                   | 0.00064011 | 0.00826305 | -2.44 | 0.18 |
| TAF2     | TAF2 RNA POLYMERASE II, TATA BOX BINDING PROTEIN (TBP)-                                                        | 0.00011117 | 0.00305128 | -1.19 | 0.44 |

|           |                                                                                 |            |            |       |      |
|-----------|---------------------------------------------------------------------------------|------------|------------|-------|------|
|           | ASSOCIATED FACTOR, 150KDA                                                       |            |            |       |      |
| TAF7      | TAF7 RNA POLYMERASE II, TATA BOX BINDING PROTEIN (TBP)-ASSOCIATED FACTOR, 55kDA | 1.0175E-05 | 0.00090489 | 1.32  | 2.50 |
| TCEA3     | TRANSCRIPTION ELONGATION FACTOR A (SII), 3                                      | 0.00065197 | 0.00836717 | 2.08  | 4.23 |
| TCEAL1    | TRANSCRIPTION ELONGATION FACTOR A (SII)-LIKE 1                                  | 5.0551E-06 | 0.00060556 | -1.94 | 0.26 |
| TCOF1     | TREACHER COLLINS-FRANCESCHETTI SYNDROME 1                                       | 4.6172E-05 | 0.0019533  | 1.18  | 2.26 |
| TESC      | TESCALCIN                                                                       | 0.0011942  | 0.01213993 | -1.21 | 0.43 |
| TGIF2     | TGFB-INDUCED FACTOR HOMEBOX 2                                                   | 0.00014905 | 0.0035981  | -1.06 | 0.48 |
| TGM2      | TRANSGLUTAMINASE 2 (C POLYPEPTIDE, PROTEIN-GLUTAMINE-GAMMA-GLUTAMYLTRANSFERASE) | 0.00379868 | 0.02333211 | 2.17  | 4.51 |
| TIAL1     | TIA1 CYTOTOXIC GRANULE-ASSOCIATED RNA BINDING PROTEIN-LIKE 1                    | 5.0638E-05 | 0.00204272 | 1.18  | 2.26 |
| TIAM1     | T-CELL LYMPHOMA INVASION AND METASTASIS 1                                       | 0.00040028 | 0.00630165 | -1.02 | 0.49 |
| TIFA      | TRAF-INTERACTING PROTEIN WITH FORKHEAD-ASSOCIATED DOMAIN                        | 7.7179E-05 | 0.0024521  | 1.66  | 3.16 |
| TIMM23    | TRANSLOCASE OF INNER MITOCHONDRIAL MEMBRANE 23 HOMOLOG                          | 6.7793E-05 | 0.0022989  | 1.14  | 2.20 |
| TIMM50    | TRANSLOCASE OF INNER MITOCHONDRIAL MEMBRANE 50 HOMOLOG                          | 0.00019047 | 0.00410286 | 1.04  | 2.06 |
| TIPARP    | TCDD-INDUCIBLE POLY(ADP-RIBOSE) POLYMERASE                                      | 5.3128E-06 | 0.00061209 | 1.24  | 2.35 |
| TLE1      | TRANSDUCIN-LIKE ENHANCER OF SPLIT 1 (E(SP1) HOMOLOG)                            | 1.9945E-05 | 0.0012798  | -1.01 | 0.50 |
| TLE3      | TRANSDUCIN-LIKE ENHANCER OF SPLIT 3 (E(SP1) HOMOLOG)                            | 5.8062E-05 | 0.00212187 | -1.04 | 0.49 |
| TLR7      | TOLL-LIKE RECEPTOR7                                                             | 4.2463E-05 | 0.00188274 | 1.47  | 2.76 |
| TM9SF2    | TRANSMEMBRANE 9 SUPERFAMILY MEMBER 2                                            | 9.0277E-10 | 6.8647E-06 | 3.32  | 9.98 |
| TMBIM6    | TRANSMEMBRANE BAX INHIBITOR MOTIF CONTAINING 6                                  | 0.00045199 | 0.006759   | -1.22 | 0.43 |
| TMED1     | TRANSMEMBRANE EMP24 PROTEIN TRANSPORT DOMAIN CONTAINING 1                       | 6.1226E-05 | 0.00215039 | -1.46 | 0.36 |
| TMEM167A  | TRANSMEMBRANE PROTEIN 167A                                                      | 0.00067327 | 0.00849714 | -1.01 | 0.50 |
| TMEM41B   | TRANSMEMBRANE PROTEIN 41B                                                       | 3.7712E-05 | 0.00179031 | -1.69 | 0.31 |
| TMEM51    | TRANSMEMBRANE PROTEIN 51                                                        | 1.0718E-06 | 0.00028376 | 1.68  | 3.20 |
| TMEM55B   | TRANSMEMBRANE PROTEIN 55B                                                       | 0.00015195 | 0.00364499 | 1.31  | 2.48 |
| TMEM86B   | TRANSMEMBRANE PROTEIN 86B                                                       | 0.00021486 | 0.00436095 | 1.33  | 2.51 |
| TNFAIP3   | TUMOR NECROSIS FACTOR, ALPHA-INDUCED PROTEIN 3                                  | 4.946E-05  | 0.00200581 | -1.46 | 0.36 |
| TNFRSF13B | TUMOR NECROSIS FACTOR RECEPTOR SUPERFAMILY, MEMBER 13B                          | 9.6533E-05 | 0.00279065 | 2.05  | 4.13 |
| TOMM20    | TRANSLOCASE OF OUTER MITOCHONDRIAL MEMBRANE 20 HOMOLOG                          | 0.00070794 | 0.00876733 | -1.04 | 0.49 |
| TOMM5     | TRANSLOCASE OF OUTER MITOCHONDRIAL MEMBRANE 5 HOMOLOG                           | 7.3487E-06 | 0.00072646 | 1.55  | 2.93 |
| TP53      | TUMOR PROTEIN P53                                                               | 0.00211734 | 0.01704309 | 1.29  | 2.45 |
| TP53INP2  | TUMOR PROTEIN P53 INDUCIBLE NUCLEAR PROTEIN 2                                   | 5.0227E-08 | 7.6385E-05 | -3.80 | 0.07 |
| TPM1      | TROPOMYOSIN 1 (ALPHA)                                                           | 1.4566E-05 | 0.00111113 | 1.44  | 2.71 |
| TPM4      | TROPOMYOSIN 4                                                                   | 0.00137239 | 0.01325159 | -1.11 | 0.46 |
| TPRKB     | TP53RK BINDING PROTEIN                                                          | 0.00022047 | 0.00438285 | -1.69 | 0.31 |
| TRAPPC6B  | TRAFFICKING PROTEIN PARTICLE COMPLEX 6B                                         | 0.00056854 | 0.00767883 | -1.19 | 0.44 |
| TRIAP1    | TP53 REGULATED INHIBITOR OF APOPTOSIS 1                                         | 1.4602E-05 | 0.00111113 | 1.12  | 2.17 |
| TRIP12    | THYROID HORMONE RECEPTOR INTERACTOR 12                                          | 0.00238753 | 0.01815473 | 1.11  | 2.17 |
| TRIP13    | SIMILAR TO THYROID HORMONE RECEPTOR INTERACTOR 13                               | 0.01519413 | 0.047052   | 1.25  | 2.38 |
| TSC22D2   | TSC22 DOMAIN FAMILY, MEMBER 2                                                   | 1.7378E-06 | 0.00034669 | -1.54 | 0.34 |
| TSEN34    | tRNA SPLICING ENDONUCLEASE 34 HOMOLOG                                           | 0.00157365 | 0.01437358 | 1.07  | 2.10 |
| TSPAN31   | TETRASPANIN 31                                                                  | 0.00815728 | 0.03445999 | 1.08  | 2.11 |
| TSPAN6    | TETRASPANIN 6                                                                   | 0.00249855 | 0.01856248 | -1.38 | 0.38 |
| TUBA1A    | TUBULIN, ALPHA 1                                                                | 0.00015035 | 0.00362365 | -1.08 | 0.47 |
| TUBA4A    | TUBULIN, ALPHA 4A                                                               | 0.00102648 | 0.01114256 | -1.40 | 0.38 |
| TUBB2B    | TUBULIN, BETA 2B                                                                | 0.00021795 | 0.00436958 | 1.67  | 3.17 |
| TXNL4A    | THIOREDOXIN-LIKE 4A                                                             | 0.00029118 | 0.00520864 | 1.12  | 2.18 |
| UBE2C     | UBIQUITIN-CONJUGATING ENZYME E2C                                                | 0.00186373 | 0.01591447 | 1.63  | 3.09 |
| UBE2L6    | UBIQUITIN-CONJUGATING ENZYME E2L 6                                              | 5.2826E-06 | 0.00061209 | 2.35  | 5.11 |
| UBE2S     | UBIQUITIN-CONJUGATING ENZYME E2S                                                | 0.0009598  | 0.01064674 | 1.22  | 2.32 |
| UBFD1     | UBIQUITIN FAMILY DOMAIN CONTAINING 1                                            | 6.0668E-05 | 0.00214568 | 1.10  | 2.14 |
| UCP2      | UNCOUPLING PROTEIN 2 (MITOCHONDRIAL, PROTON CARRIER)                            | 6.6997E-05 | 0.0022989  | -1.23 | 0.43 |
| UGGT1     | UDP-GLUCOSE GLYCOPROTEIN GLUCOSYLTRANSFERASE 1                                  | 0.00055736 | 0.00761572 | -1.22 | 0.43 |
| ULBP3     | ULBP17 PROTEIN                                                                  | 0.00342277 | 0.02215986 | 2.82  | 7.08 |
| UTP3      | UTP3, SMALL SUBUNIT (SSU) PROCESSOME COMPONENT, HOMOLOG                         | 9.0221E-05 | 0.00270095 | 1.02  | 2.03 |
| UTRN      | UTROPHIN                                                                        | 9.1677E-05 | 0.00271777 | -1.35 | 0.39 |
| VAPA      | VESICLE-ASSOCIATED MEMBRANE PROTEIN-ASSOCIATED PROTEIN A                        | 9.2993E-05 | 0.00274078 | -1.21 | 0.43 |
| VPS52     | VACUOLAR PROTEIN SORTING 52 HOMOLOG                                             | 1.5499E-05 | 0.00116114 | 1.12  | 2.18 |
| WARS      | TRYPTOPHANYL-tRNA SYNTHETASE                                                    | 0.00188684 | 0.0160129  | 1.36  | 2.57 |
| WDR45L    | WDR45-LIKE                                                                      | 2.1998E-05 | 0.00133947 | -1.70 | 0.31 |
| WDR6      | WD REPEAT DOMAIN 6                                                              | 0.00010806 | 0.0030032  | -1.11 | 0.46 |
| WDR67     | WD REPEAT DOMAIN 67                                                             | 0.00137757 | 0.01327742 | -1.20 | 0.43 |
| XAF1      | XIAP ASSOCIATED FACTOR 1                                                        | 6.0013E-05 | 0.00214228 | 1.29  | 2.45 |
| XBP1      | X-BOX BINDING PROTEIN 1                                                         | 0.00071109 | 0.00877778 | -1.15 | 0.45 |
| XIST      | X (INACTIVE)-SPECIFIC TRANSCRIPT (NON-PROTEIN CODING)                           | 4.6338E-05 | 0.0019533  | -1.08 | 0.47 |
| XRCC2     | X-RAY REPAIR COMPLEMENTING DEFECTIVE REPAIR IN CHINESE HAMSTER CELLS 2          | 3.4021E-05 | 0.001675   | 1.28  | 2.43 |
| XRN1      | 5'-3' EXORIBONUCLEASE 1                                                         | 0.0002622  | 0.00488663 | -1.03 | 0.49 |
| ZBTB10    | ZINC FINGER AND BTB DOMAIN CONTAINING 10                                        | 5.2537E-07 | 0.00020487 | -2.05 | 0.24 |
| ZBTB38    | ZINC FINGER AND BTB DOMAIN CONTAINING 38                                        | 0.00078407 | 0.00939495 | -1.01 | 0.50 |

|         |                                              |            |            |       |      |
|---------|----------------------------------------------|------------|------------|-------|------|
| ZCCHC7  | NUCLEAR FACTOR (ERYTHROID-DERIVED 2)-LIKE 1  | 6.8098E-05 | 0.0022989  | 1.32  | 2.49 |
| ZFAND5  | ZINC FINGER, AN1-TYPE DOMAIN 5               | 9.0126E-05 | 0.00270095 | -1.58 | 0.34 |
| ZFP36L2 | ZINC FINGER PROTEIN 36, C3H TYPE-LIKE 2      | 7.9837E-07 | 0.00023807 | -1.96 | 0.26 |
| ZNF295  | ZINC FINGER PROTEIN 295                      | 3.37E-05   | 0.0016694  | -1.30 | 0.41 |
| ZNF32   | ZINC FINGER PROTEIN 32                       | 5.2581E-06 | 0.00061209 | 1.21  | 2.31 |
| ZNF329  | ZINC FINGER PROTEIN 329                      | 0.00011502 | 0.00310708 | 1.18  | 2.26 |
| ZNF691  | ZINC FINGER PROTEIN 691                      | 0.0007917  | 0.00944322 | 1.01  | 2.01 |
| ZNF75D  | ZINC FINGER PROTEIN 75D                      | 3.1263E-07 | 0.00016395 | 1.99  | 3.97 |
| ZP3     | ZONA PELLUCIDA GLYCOPROTEIN 3                | 1.7928E-05 | 0.00124703 | -1.55 | 0.34 |
| ZRANB1  | ZINC FINGER, RAN-BINDING DOMAIN CONTAINING 1 | 0.00540519 | 0.02790714 | -1.10 | 0.47 |
| ZWINT   | ZW10 INTERACTOR                              | 0.00044674 | 0.00671348 | -1.41 | 0.38 |

\* The genes that were significantly modulated ( $p < 0.05$  with Benjamini-Hochberg correction for multiple testing) and showed a mean fold expression value  $> 2$  or  $< 0.5$  upon BTV infection were selected.

**Table S3. DEG in lymph node cDCs upon BTV infection\***

| Official gene symbol | Approved Name                                                                                | Raw.pValue | Adj.pValue | Mean log fold change | Mean fold change |
|----------------------|----------------------------------------------------------------------------------------------|------------|------------|----------------------|------------------|
| AADAT                | AMINOADIPATE AMINOTRANSFERASE                                                                | 0.0013924  | 0.02262348 | -1.01                | 0.50             |
| ABCC5                | ATP-BINDING CASSETTE, SUB-FAMILY C (CFTR/MRP), MEMBER 5                                      | 0.00075753 | 0.0175036  | 1.26                 | 2.40             |
| ABCF1                | ATP-BINDING CASSETTE, SUB-FAMILY F (GCN20), MEMBER 1                                         | 0.000779   | 0.00170347 | 1.03                 | 2.05             |
| ABCG2                | ATP-BINDING CASSETTE, SUB-FAMILY G (WHITE), MEMBER 2                                         | 8.3947E-06 | 0.01623605 | -1.81                | 0.28             |
| ABLIM1               | ACTIN BINDING LIM PROTEIN 1                                                                  | 0.0008471  | 0.00576711 | -1.26                | 0.42             |
| ACAD8                | ACYL-CoA DEHYDROGENASE FAMILY, MEMBER 8                                                      | 4.0252E-05 | 0.01883736 | -1.68                | 0.31             |
| ACADL                | ACYL-COENZYME A DEHYDROGENASE, LONG-CHAIN                                                    | 9.9855E-06 | 0.00284121 | -1.85                | 0.28             |
| ACBD6                | ACYL-CoA BINDING DOMAIN CONTAINING 6                                                         | 0.00234446 | 0.00292013 | -1.06                | 0.48             |
| ACTN1                | ACTININ, ALPHA 1                                                                             | 0.00069268 | 0.03590749 | -1.19                | 0.44             |
| ACTR1A               | ARP1 ACTIN-RELATED PROTEIN 1 HOMOLOG A, CONTRACTIN ALPHA                                     | 0.00114955 | 0.04502366 | 1.16                 | 2.23             |
| ACVR2B               | ACTIVIN A RECEPTOR, TYPE IIB                                                                 | 1.2186E-05 | 0.0075114  | 1.64                 | 3.12             |
| ADA                  | ADENOSINE DEAMINASE                                                                          | 0.00146017 | 0.01910066 | -1.91                | 0.27             |
| ADAMTSL4             | ADAMTS-LIKE 4                                                                                | 0.00123146 | 0.02066057 | 1.44                 | 2.71             |
| ADM                  | ADRENOMEDULLIN                                                                               | 3.8742E-05 | 1.4935E-05 | -1.32                | 0.40             |
| AGPAT6               | 1-ACYLGLYCEROL-3-PHOSPHATE O-ACYLTRANSFERASE 6 (LYSOPHOSPHATIDIC ACID ACYLTRANSFERASE, ZETA) | 0.00042567 | 0.01223742 | 1.59                 | 3.01             |
| AHSA1                | AHA1, ACTIVATOR OF HEAT SHOCK 90KDA PROTEIN ATPASE HOMOLOG 1                                 | 6.6146E-06 | 0.01883506 | 3.01                 | 8.05             |
| ALOX5AP              | ARACHIDONATE 5-LIPOXYGENASE ACTIVATING PROTEIN                                               | 1.7719E-05 | 0.01775296 | -1.83                | 0.28             |
| AMICA1               | ADHESION MOLECULE, INTERACTS WITH CXADR ANTIGEN 1                                            | 0.00042033 | 0.00481401 | -1.66                | 0.32             |
| AMN                  | AMNIONLESS HOMOLOG                                                                           | 0.00016426 | 0.01601083 | -1.05                | 0.48             |
| ANGPT1               | ANGIOPOIETIN 1                                                                               | 0.00015547 | 0.03039685 | -1.36                | 0.39             |
| ANKRD10              | ANKYRIN REPEAT DOMAIN 10                                                                     | 7.7695E-05 | 0.00351812 | 1.20                 | 2.29             |
| ANP32A               | ACIDIC (LEUCINE-RICH) NUCLEAR PHOSPHOPROTEIN 32 FAMILY, MEMBER A                             | 0.000865   | 0.01219909 | 1.17                 | 2.25             |
| ANTXR2               | ANTHRAX TOXIN RECEPTOR 2                                                                     | 8.0525E-06 | 0.00340771 | 1.74                 | 3.35             |
| ANXA2                | ANNEXIN A2                                                                                   | 0.00022481 | 0.00141885 | 1.52                 | 2.87             |
| AP2B1                | ADAPTOR-RELATED PROTEIN COMPLEX 2, BETA 1 SUBUNIT                                            | 0.00044773 | 0.00703815 | 1.19                 | 2.29             |
| AQP3                 | AQUAPORIN 3                                                                                  | 0.00240516 | 0.0029256  | -2.30                | 0.20             |
| ARG2                 | ARGINASE, TYPE II                                                                            | 0.00264698 | 0.00451601 | -1.36                | 0.39             |
| ARPC5L               | ACTIN RELATED PROTEIN 2/3 COMPLEX, SUBUNIT 5-LIKE                                            | 8.476E-05  | 0.0083592  | 1.56                 | 2.95             |
| ARPP19               | CAMP-REGULATED PHOSPHOPROTEIN, 19KDA                                                         | 4.0655E-05 | 0.00153089 | 1.00                 | 2.01             |
| ARRDC3               | ARRESTIN DOMAIN CONTAINING 3                                                                 | 1.8033E-06 | 0.0044758  | 2.36                 | 5.13             |
| ASAH1                | N-ACYLETHANOLAMINE ACID AMIDASE                                                              | 0.0001416  | 0.02028111 | 1.07                 | 2.10             |
| ATP6V0A2             | ATPASE, H+ TRANSPORTING, LYSOSOMAL V0 SUBUNIT A2                                             | 7.2083E-05 | 0.00085702 | -1.07                | 0.48             |
| B4GALT3              | UDP-GAL:BETAGLcNAc BETA 1,4- GALACTOSYLTRANSFERASE, POLYPEPTIDE 3                            | 4.8198E-05 | 0.00438495 | 1.13                 | 2.19             |
| BAG2                 | BCL2-ASSOCIATED ATHANOGENE 2                                                                 | 9.2114E-06 | 0.01674812 | 2.28                 | 4.86             |
| BAG3                 | BCL2-ASSOCIATED ATHANOGENE 3                                                                 | 8.9916E-08 | 0.01692436 | 3.46                 | 11.04            |
| BAMBI                | BMP AND ACTIVIN MEMBRANE-BOUND INHIBITOR HOMOLOG                                             | 2.3122E-05 | 0.00153814 | -1.31                | 0.40             |
| BANF1                | BARRIER TO AUTOINTEGRATION FACTOR 1                                                          | 6.7173E-06 | 0.01883506 | 1.40                 | 2.64             |
| BATF                 | BASIC LEUCINE ZIPPER TRANSCRIPTION FACTOR, ATF-LIKE 3                                        | 1.125E-05  | 0.00203201 | 2.33                 | 5.04             |
| BBS1                 | DIPEPTIDYL-PEPTIDASE 3                                                                       | 0.00096338 | 0.00273279 | 1.16                 | 2.23             |
| BCAM                 | BASAL CELL ADHESION MOLECULE                                                                 | 1.5232E-05 | 0.00182009 | 1.68                 | 3.21             |
| BCAP31               | B-CELL RECEPTOR-ASSOCIATED PROTEIN 31                                                        | 9.6867E-05 | 0.0044758  | 1.61                 | 3.06             |
| BCKDHB               | BRANCHED CHAIN KETO ACID DEHYDROGENASE E1, BETA POLYPEPTIDE                                  | 0.00236036 | 0.00709679 | -1.49                | 0.36             |
| BCL11B               | B-CELL CLL/LYMPHOMA 11B (ZINC FINGER PROTEIN)                                                | 7.5485E-05 | 0.00161019 | -1.13                | 0.46             |
| BCL2L15              | BCL2-LIKE 15                                                                                 | 0.00212717 | 0.00020392 | 1.04                 | 2.05             |
| BHLHE40              | BASIC HELIX-LOOP-HELIX FAMILY, MEMBER E40                                                    | 1.4943E-05 | 0.02867446 | -1.69                | 0.31             |
| BIRC2                | BACULOVIRAL IAP REPEAT CONTAINING 2                                                          | 0.00097852 | 0.00185535 | 1.20                 | 2.30             |
| BLZF1                | BASIC LEUCINE ZIPPER NUCLEAR FACTOR 1                                                        | 2.6595E-05 | 0.00393669 | 1.19                 | 2.27             |
| BNIP3L               | BCL2/ADENOVIRUS E1B 19KDA INTERACTING PROTEIN 3-LIKE                                         | 0.00016846 | 0.03049423 | -1.04                | 0.49             |
| BRD8                 | BROMODOMAIN CONTAINING 8                                                                     | 0.00299382 | 0.03834153 | 1.26                 | 2.40             |
| BRP44                | BRAIN PROTEIN 44                                                                             | 5.7466E-05 | 0.03124483 | -1.07                | 0.48             |
| BST2                 | BONE MARROW STROMAL CELL ANTIGEN 2                                                           | 1.1834E-05 | 0.0372401  | 1.66                 | 3.15             |
| BTG2                 | BTG FAMILY, MEMBER 2                                                                         | 0.00358506 | 0.00632575 | -1.28                | 0.41             |
| C12ORF30             | N(ALPHA)-ACETYLTRANSFERASE 25, NATB AUXILIARY SUBUNIT                                        | 0.00032279 | 0.003745   | -1.18                | 0.44             |
| C13ORF15             | CHROMOSOME 13 OPEN READING FRAME 15                                                          | 0.00026819 | 0.00353302 | -1.31                | 0.40             |
| C14ORF73             | CHROMOSOME 14 OPEN READING FRAME 73                                                          | 0.00171528 | 0.02027197 | -1.60                | 0.33             |
| C19ORF2              | CHROMOSOME 19 OPEN READING FRAME 2                                                           | 0.00020616 | 0.00550335 | -1.11                | 0.46             |
| C19ORF40             | CHROMOSOME 19 OPEN READING FRAME 40                                                          | 0.00147527 | 0.00087238 | 1.03                 | 2.04             |
| C19ORF42             | CHROMOSOME 19 OPEN READING FRAME 42                                                          | 0.00217649 | 0.01518777 | 1.44                 | 2.71             |
| C10RF128             | CHROMOSOME 1 OPEN READING FRAME 128                                                          | 0.0020696  | 0.02912791 | 1.22                 | 2.33             |
| C20ORF30             | CHROMOSOME 20 OPEN READING FRAME 30                                                          | 0.00118867 | 0.00877753 | 1.11                 | 2.17             |
| C4ORF34              | CHROMOSOME 4 OPEN READING FRAME 34                                                           | 0.00253455 | 0.00906022 | -1.01                | 0.50             |
| C4ORF34              | CHROMOSOME 4 OPEN READING FRAME 34                                                           | 0.00022276 | 0.01886295 | -1.23                | 0.43             |

|          |                                                                                   |            |            |       |      |
|----------|-----------------------------------------------------------------------------------|------------|------------|-------|------|
| C5ORF32  | CHROMOSOME 5 OPEN READING FRAME 32 ORTHOLOG                                       | 3.5454E-05 | 0.04369729 | 1.21  | 2.31 |
| C6ORF106 | CHROMOSOME 6 OPEN READING FRAME 106                                               | 0.00260315 | 0.00953203 | 1.28  | 2.42 |
| C6ORF145 | CHROMOSOME 6 OPEN READING FRAME 145                                               | 5.383E-06  | 0.00154486 | -1.99 | 0.25 |
| CALCA    | CALCITONIN-RELATED POLYPEPTIDE ALPHA                                              | 0.00342086 | 0.04466367 | -1.14 | 0.45 |
| CAPN3    | CALPAIN 3, (P94)                                                                  | 1.0629E-05 | 0.0433421  | -1.36 | 0.39 |
| CASP5    | CASPASE 9, APOPTOSIS-RELATED CYSTEINE PEPTIDASE                                   | 0.00218344 | 0.00518424 | 1.47  | 2.77 |
| CAST     | CALPASTATIN                                                                       | 0.00013812 | 0.03365912 | -1.12 | 0.46 |
| CCNI     | CYCLIN I                                                                          | 0.00458903 | 0.01170479 | 1.49  | 2.81 |
| CCT3     | CHAPERONIN CONTAINING TCP1, SUBUNIT 3 (GAMMA)                                     | 4.0416E-06 | 0.02827435 | 1.85  | 3.60 |
| CD200    | CD200 ANTIGEN; SIMILAR TO MRC OX-2 ANTIGEN HOMOLOG                                | 0.00514801 | 0.04052306 | 1.27  | 2.41 |
| CD3E     | CD3 ANTIGEN, EPSILON POLYPEPTIDE                                                  | 0.00403569 | 0.00801919 | -1.15 | 0.45 |
| CD5      | CD5 MOLECULE                                                                      | 0.00036411 | 0.01468279 | -1.22 | 0.43 |
| CD6      | CD6 MOLECULE                                                                      | 0.00071316 | 0.00914501 | -1.03 | 0.49 |
| CD97     | CD97 MOLECULE                                                                     | 8.6345E-06 | 0.02339505 | -1.64 | 0.32 |
| CDCA7    | CELL DIVISION CYCLE ASSOCIATED 7                                                  | 5.4455E-05 | 0.02908622 | 1.49  | 2.81 |
| CDK7     | CYCLIN-DEPENDENT KINASE 7                                                         | 0.0050567  | 0.0206834  | 1.06  | 2.08 |
| CDV3     | CDV3 HOMOLOG                                                                      | 0.00470155 | 0.0317246  | -1.32 | 0.40 |
| CEACAM8  | CARCINOEMBRYONIC ANTIGEN-RELATED CELL ADHESION MOLECULE 8                         | 2.8102E-06 | 0.0083034  | 1.54  | 2.90 |
| CEBPD    | CCAAT/ENHANCER BINDING PROTEIN (C/EBP), DELTA                                     | 0.00028413 | 0.00322862 | 1.14  | 2.20 |
| CEP78    | CENTROSOMAL PROTEIN 78KDA                                                         | 0.00443738 | 0.03213367 | -1.04 | 0.49 |
| CES1     | CARBOXYLESTERASE 1                                                                | 0.0001092  | 0.00124038 | -1.46 | 0.36 |
| CHD8     | CHROMODOMAIN HELICASE DNA BINDING PROTEIN 8                                       | 0.00059939 | 0.01106353 | 1.24  | 2.36 |
| CHES1L1  | CHECKPOINT SUPPRESSOR 1-LIKE 1                                                    | 9.5483E-05 | 0.04026941 | -1.31 | 0.40 |
| CHMP4A   | CHROMATIN MODIFYING PROTEIN 4A                                                    | 0.00395425 | 0.00912934 | 1.14  | 2.21 |
| CHMP4B   | CHROMATIN MODIFYING PROTEIN 4B                                                    | 0.00020773 | 0.02609455 | 1.06  | 2.08 |
| CHORDC1  | CYSTEINE AND HISTIDINE-RICH DOMAIN (CHORD) CONTAINING 1                           | 0.00099285 | 0.00199372 | 1.54  | 2.92 |
| CHTF8    | CTF8, CHROMOSOME TRANSMISSION FIDELITY FACTOR 8 HOMOLOG                           | 0.0017759  | 0.04385173 | 1.02  | 2.03 |
| CITED2   | CBP/P300-INTERACTING TRANSACTIVATOR, WITH GLU/ASP-RICH CARBOXY-TERMINAL DOMAIN, 2 | 0.00013852 | 0.00194493 | -1.37 | 0.39 |
| CKAP4    | CYTOSKELETON-ASSOCIATED PROTEIN 4                                                 | 4.7064E-06 | 0.02752311 | 2.10  | 4.29 |
| CLCN6    | CHLORIDE CHANNEL 6                                                                | 0.00039406 | 0.01081912 | -1.59 | 0.33 |
| CLDN4    | CLAUDIN 4                                                                         | 0.00026297 | 0.0011361  | -1.15 | 0.45 |
| CLIC4    | CHLORIDE INTRACELLULAR CHANNEL 4                                                  | 0.00206914 | 0.01016117 | -1.02 | 0.49 |
| CLK2     | CDC-LIKE KINASE 2                                                                 | 0.00230929 | 0.0083034  | 1.32  | 2.50 |
| CNN2     | CALPONIN 2                                                                        | 4.5803E-05 | 0.01864012 | 1.02  | 2.03 |
| CNO      | CAPPUCCINO HOMOLOG                                                                | 0.00114682 | 0.01859361 | -1.01 | 0.50 |
| COLEC11  | COLLECTIN SUB-FAMILY MEMBER 11                                                    | 2.9552E-06 | 0.03782395 | -3.15 | 0.11 |
| COMMD8   | COMM DOMAIN CONTAINING 8                                                          | 0.00026353 | 0.00370702 | 1.16  | 2.23 |
| COPS4    | COP9 (CONSTITUTIVE PHOTOMORPHOGENIC) HOMOLOG, SUBUNIT 4 (ARABIDOPSIS THALIANA)    | 0.00095453 | 0.04669615 | 1.20  | 2.30 |
| CPPED1   | CALCINEURIN-LIKE PHOSPHOESTERASE DOMAIN CONTAINING 1                              | 0.00246334 | 0.00225939 | -1.57 | 0.34 |
| CSNK1D   | CASEIN KINASE 1, DELTA                                                            | 0.00063416 | 0.00399364 | 1.28  | 2.43 |
| CSRP2    | CYSTEINE AND GLYCINE-RICH PROTEIN 2                                               | 0.00059678 | 0.00525317 | -1.42 | 0.37 |
| CST7     | CYSTATIN F (LEUKOCYSTATIN)                                                        | 5.3836E-05 | 0.00524706 | 2.46  | 5.49 |
| CTNBL1   | CATENIN, BETA LIKE 1                                                              | 0.00024068 | 0.00856955 | -1.36 | 0.39 |
| CTSB     | CATHEPSIN B                                                                       | 0.00025617 | 0.00712006 | 1.25  | 2.37 |
| CTSD     | CATHEPSIN D                                                                       | 0.00021471 | 0.01696415 | 1.36  | 2.56 |
| CTSH     | CATHEPSIN H                                                                       | 0.0009873  | 0.04342064 | 1.42  | 2.67 |
| CTSZ     | CATHEPSIN Z                                                                       | 0.0045427  | 0.01060703 | 1.33  | 2.52 |
| CUL1     | CULLIN 1                                                                          | 1.4421E-05 | 0.02179983 | 1.34  | 2.53 |
| CXCL10   | CHEMOKINE (C-X-C MOTIF) LIGAND 10                                                 | 0.00282278 | 0.00495236 | 1.31  | 2.48 |
| CXCL5    | CHEMOKINE (C-X-C MOTIF) LIGAND 5                                                  | 0.00281706 | 0.00913784 | -1.27 | 0.42 |
| CXCR4    | CHEMOKINE (C-X-C MOTIF) RECEPTOR 4                                                | 8.4834E-05 | 0.01399381 | -1.31 | 0.40 |
| CYB5A    | CYTOCHROME B5 TYPE A (MICROSOMAL)                                                 | 0.00026635 | 0.0127329  | 1.72  | 3.28 |
| CYB5B    | CYTOCHROME B5 TYPE B (OUTER MITOCHONDRIAL MEMBRANE)                               | 0.00034575 | 0.01603807 | 1.26  | 2.39 |
| CYP51A1  | CYTOCHROME P450, FAMILY 51, SUBFAMILY A, POLYPEPTIDE 1                            | 5.1232E-05 | 0.00814251 | -1.29 | 0.41 |
| DAAM1    | DISHEVELLED ASSOCIATED ACTIVATOR OF MORPHOGENESIS 1                               | 0.00351677 | 0.00385418 | -1.26 | 0.42 |
| DDX5     | DEAD (ASP-GLU-ALA-ASP) BOX POLYPEPTIDE 5                                          | 0.00046384 | 0.00459436 | 1.40  | 2.65 |
| DDX5     | DEAD (ASP-GLU-ALA-ASP) BOX POLYPEPTIDE 5                                          | 0.00058546 | 0.03419898 | -1.19 | 0.44 |
| DENND4A  | DENN/MADD DOMAIN CONTAINING 4A                                                    | 0.00012097 | 0.00198929 | -1.44 | 0.37 |
| DERL2    | DER1-LIKE DOMAIN FAMILY, MEMBER 2                                                 | 0.00022211 | 0.03624641 | 1.49  | 2.81 |
| DGAT1    | DIACYLGLYCEROL O-ACYLTRANSFERASE HOMOLOG 1                                        | 1.9721E-05 | 0.0107555  | 1.34  | 2.53 |
| DKK3     | DICKKOPF HOMOLOG 3                                                                | 0.0011477  | 0.01989582 | -1.05 | 0.48 |
| DLC1     | DELETED IN LIVER CANCER 2                                                         | 0.00031274 | 0.00200486 | -1.01 | 0.50 |
| DNAJB1   | DNAJ (HSP40) HOMOLOG, SUBFAMILY B, MEMBER 1                                       | 2.5432E-07 | 0.00260718 | 1.84  | 3.57 |
| DNAJB2   | DNAJ (HSP40) HOMOLOG, SUBFAMILY B, MEMBER 2                                       | 4.4363E-05 | 0.00489157 | 1.14  | 2.21 |
| DNAJC14  | DNAJ (HSP40) HOMOLOG, SUBFAMILY C, MEMBER 14                                      | 0.00517686 | 0.01887553 | 1.06  | 2.08 |
| DOK2     | DOCKING PROTEIN 2, 56KDA                                                          | 1.8561E-05 | 0.0175036  | 1.28  | 2.43 |
| DOPEY1   | DOPEY FAMILY MEMBER 1                                                             | 5.8823E-05 | 0.03729952 | -1.08 | 0.47 |
| DUSP5    | DUAL SPECIFICITY PHOSPHATASE 5                                                    | 0.00010121 | 0.00611555 | -1.17 | 0.45 |

|           |                                                                                                                            |            |            |       |       |
|-----------|----------------------------------------------------------------------------------------------------------------------------|------------|------------|-------|-------|
| DYSF      | DYSFERLIN, LIMB GIRDLE MUSCULAR DYSTROPHY 2B (AUTOSOMAL RECESSIVE)                                                         | 0.00010006 | 0.01765533 | 2.23  | 4.68  |
| EBI3      | EPSTEIN-BARR VIRUS INDUCED 3                                                                                               | 0.00128867 | 0.00087238 | -1.25 | 0.42  |
| ECM1      | EXTRACELLULAR MATRIX PROTEIN 1                                                                                             | 0.00070024 | 0.0218432  | 1.19  | 2.29  |
| EGR3      | EARLY GROWTH RESPONSE 3                                                                                                    | 0.00017011 | 0.02499928 | -2.15 | 0.22  |
| EIF1AD    | EUKARYOTIC TRANSLATION INITIATION FACTOR 1A DOMAIN CONTAINING                                                              | 9.0498E-05 | 0.00385961 | 1.44  | 2.72  |
| EIF2AK2   | EUKARYOTIC TRANSLATION INITIATION FACTOR 2-ALPHA KINASE 2                                                                  | 0.00026532 | 0.04020006 | 1.71  | 3.26  |
| EIF4A1    | EUKARYOTIC TRANSLATION INITIATION FACTOR 4A, ISOFORM 1                                                                     | 9.8324E-05 | 0.01674812 | -1.63 | 0.32  |
| EIF4B     | SIMILAR TO EUKARYOTIC TRANSLATION INITIATION FACTOR 4H; EUKARYOTIC TRANSLATION INITIATION FACTOR 4B                        | 2.576E-05  | 0.00087238 | -1.06 | 0.48  |
| EIF4E     | EUKARYOTIC TRANSLATION INITIATION FACTOR 4E                                                                                | 0.00053116 | 8.2329E-05 | 1.40  | 2.64  |
| EIF6      | EUKARYOTIC TRANSLATION INITIATION FACTOR 6                                                                                 | 0.00046376 | 0.0018681  | 1.04  | 2.05  |
| ELOVL7    | ELOVL FAMILY MEMBER 7, ELONGATION OF LONG CHAIN FATTY ACIDS                                                                | 1.6781E-05 | 0.0018681  | -2.56 | 0.17  |
| ENPP2     | ECTONUCLEOTIDE PYROPHOSPHATASE/PHOSPHODIESTERASE 2                                                                         | 0.00078529 | 0.01817823 | -2.39 | 0.19  |
| EPAS1     | ENDOTHELIAL PAS DOMAIN PROTEIN 1                                                                                           | 0.00445513 | 0.02965666 | -1.09 | 0.47  |
| ERBB3     | V-ERB-B2 ERYTHROBLASTIC LEUKEMIA VIRAL ONCOGENE HOMOLOG 3                                                                  | 0.00116158 | 0.00282783 | -1.00 | 0.50  |
| ESRP2     | EPITHELIAL SPLICING REGULATORY PROTEIN 2                                                                                   | 0.00033199 | 0.00632575 | 2.02  | 4.06  |
| EXOC6     | COBL-LIKE 1                                                                                                                | 0.00391361 | 0.00153089 | -1.96 | 0.26  |
| EZR       | EZRIN                                                                                                                      | 0.00088741 | 0.00385418 | -1.16 | 0.45  |
| FADS1     | FATTY ACID DESATURASE 3                                                                                                    | 0.00326284 | 0.00416645 | -1.47 | 0.36  |
| FADS2     | FATTY ACID DESATURASE 2                                                                                                    | 9.9712E-05 | 0.00226807 | -2.72 | 0.15  |
| FAM105A   | FAMILY WITH SEQUENCE SIMILARITY 105, MEMBER A                                                                              | 0.00021149 | 0.00290395 | -1.49 | 0.35  |
| FAM107B   | FAMILY WITH SEQUENCE SIMILARITY 107, MEMBER B                                                                              | 1.3271E-05 | 0.02205636 | -1.67 | 0.31  |
| FAM189B   | FAMILY WITH SEQUENCE SIMILARITY 189, MEMBER B                                                                              | 4.9122E-05 | 0.04583222 | 1.03  | 2.04  |
| FAM32A    | FAMILY WITH SEQUENCE SIMILARITY 32, MEMBER A                                                                               | 0.00031622 | 0.00402356 | 1.11  | 2.16  |
| FAM3B     | FAMILY WITH SEQUENCE SIMILARITY 3, MEMBER B                                                                                | 7.9453E-05 | 0.00402356 | -1.53 | 0.35  |
| FAM43A    | FAMILY WITH SEQUENCE SIMILARITY 43, MEMBER A                                                                               | 0.00292113 | 0.00087238 | -1.28 | 0.41  |
| FAM83D    | FAMILY WITH SEQUENCE SIMILARITY 83, MEMBER D                                                                               | 1.3745E-05 | 0.00020392 | -1.56 | 0.34  |
| FAM98A    | FAMILY WITH SEQUENCE SIMILARITY 98, MEMBER A                                                                               | 0.0002417  | 0.00325289 | 1.21  | 2.31  |
| FAS       | FAS (TNF RECEPTOR SUPERFAMILY MEMBER 6)                                                                                    | 0.00011692 | 0.013635   | 1.66  | 3.15  |
| FCGR2B    | FC FRAGMENT OF IGG, LOW AFFINITY IIb, RECEPTOR (CD32)                                                                      | 0.00034038 | 0.00909006 | 2.07  | 4.19  |
| FGF2      | FIBROBLAST GROWTH FACTOR 2                                                                                                 | 0.00033624 | 0.03041615 | -1.12 | 0.46  |
| FGL2      | FIBRINOGEN-LIKE 2                                                                                                          | 0.00110285 | 0.00147818 | 1.16  | 2.23  |
| FKBP10    | FK506 BINDING PROTEIN 10, 65 kDA                                                                                           | 1.4633E-05 | 0.00284121 | -2.31 | 0.20  |
| FKBP4     | FK506 BINDING PROTEIN 4, 59kDA                                                                                             | 1.2652E-07 | 0.00260718 | 3.09  | 8.51  |
| FKBP5     | FK506 BINDING PROTEIN 5                                                                                                    | 2.4515E-05 | 0.0096489  | -1.25 | 0.42  |
| FLOT1     | FLOTILLIN 1                                                                                                                | 8.7487E-05 | 0.00426148 | 1.31  | 2.48  |
| FMNL2     | FORMIN-LIKE 2                                                                                                              | 0.0001794  | 0.02978708 | -1.30 | 0.41  |
| FOSL2     | FOS-LIKE ANTIGEN 2                                                                                                         | 0.0009892  | 0.00491207 | -1.38 | 0.38  |
| GALK1     | GALACTOKINASE 1                                                                                                            | 0.00343497 | 0.04020006 | 1.03  | 2.05  |
| GAPDH     | GLYCERALDEHYDE-3-PHOSPHATE DEHYDROGENASE                                                                                   | 0.00083568 | 0.01696415 | -1.21 | 0.43  |
| GCHFR     | GTP CYCLOHYDROLASE I FEEDBACK REGULATOR                                                                                    | 0.00130128 | 0.00550816 | 1.41  | 2.66  |
| GNAS      | GNAS (GUANINE NUCLEOTIDE BINDING PROTEIN, ALPHA STIMULATING) COMPLEX LOCUS                                                 | 0.00195878 | 0.00214459 | 1.08  | 2.11  |
| GPR98     | G PROTEIN-COUPLED RECEPTOR 98                                                                                              | 0.00084706 | 0.0180252  | -1.03 | 0.49  |
| GPX3      | GLUTATHIONE PEROXIDASE 3 (PLASMA)                                                                                          | 0.00085792 | 0.01458439 | -2.10 | 0.23  |
| GRASP     | GRP1 (GENERAL RECEPTOR FOR PHOSPHOINOSITIDES 1)-ASSOCIATED SCAFFOLD PROTEIN                                                | 2.3799E-06 | 0.00793146 | -1.50 | 0.35  |
| GSN       | GELSOLIN (AMYLOIDOSIS, FINNISH TYPE)                                                                                       | 0.00102007 | 0.00442405 | -1.49 | 0.36  |
| GTF2H2    | GENERAL TRANSCRIPTION FACTOR IIH, POLYPEPTIDE 2, 44kDA                                                                     | 0.00013029 | 0.00895172 | 1.10  | 2.14  |
| GUCY1B3   | GUANYLATE CYCLASE 1, SOLUBLE, BETA 3                                                                                       | 0.00164876 | 0.04367285 | -2.64 | 0.16  |
| HAO1      | HYDROXYACID OXIDASE 1,                                                                                                     | 0.00322033 | 0.0474755  | -1.48 | 0.36  |
| HCK       | HEMOPOIETIC CELL KINASE                                                                                                    | 0.00089648 | 0.01440116 | 1.31  | 2.49  |
| HDAC1     | HISTONE DEACETYLASE 1                                                                                                      | 0.00404387 | 0.0317246  | 1.30  | 2.46  |
| HDDC3     | HD DOMAIN CONTAINING 3                                                                                                     | 0.00390423 | 0.00385418 | -1.05 | 0.48  |
| HEATR6    | HEAT REPEAT CONTAINING 6                                                                                                   | 0.00075767 | 0.02440263 | 1.11  | 2.16  |
| HERPUD1   | HOMOCYSTEINE-INDUCIBLE, ENDOPLASMIC RETICULUM STRESS-INDUCIBLE, UBIQUITIN-LIKE DOMAIN MEMBER 1                             | 7.8365E-06 | 0.02000651 | -1.61 | 0.33  |
| HEY1      | HAIRY/ENHANCER-OF-SPLIT RELATED WITH YRPW MOTIF 1                                                                          | 5.4673E-05 | 0.00087238 | -1.69 | 0.31  |
| HIGD2A    | HIG1 HYPOXIA INDUCIBLE DOMAIN FAMILY, MEMBER 2A                                                                            | 2.7892E-05 | 0.01253851 | 1.08  | 2.11  |
| HIST1H2BN | HISTONE CLUSTER 1, H2BM                                                                                                    | 0.00013804 | 0.04497009 | 1.53  | 2.88  |
| HLA-A     | MAJOR HISTOCOMPATIBILITY COMPLEX, CLASS I, A                                                                               | 0.00368364 | 0.01257997 | 1.11  | 2.16  |
| HMGCL     | 3-HYDROXYMETHYL-3-METHYLGLUTARYL-CO A LYASE                                                                                | 0.00097891 | 0.00245626 | 1.27  | 2.42  |
| HMGN1     | HIGH-MOBILITY GROUP NUCLEOSOME BINDING DOMAIN 1                                                                            | 1.5654E-05 | 0.01106353 | 1.20  | 2.29  |
| HMGN3     | HIGH MOBILITY GROUP NUCLEOSOMAL BINDING DOMAIN 3                                                                           | 1.8868E-05 | 0.02205636 | 1.07  | 2.11  |
| HS3ST1    | HEPARAN SULFATE (GLUCOSAMINE) 3-O-SULFOTRANSFERASE 1                                                                       | 0.00224063 | 0.00072151 | 1.15  | 2.22  |
| HSP90AA2  | HEAT SHOCK PROTEIN 90kDA ALPHA (CYTOSOLIC), CLASS A MEMBER 2; HEAT SHOCK PROTEIN 90kDA ALPHA (CYTOSOLIC), CLASS A MEMBER 1 | 5.0152E-06 | 0.02281934 | 3.89  | 14.79 |



|          |                                                                          |            |            |       |       |
|----------|--------------------------------------------------------------------------|------------|------------|-------|-------|
| HSP90AB1 | HEAT SHOCK 90KDA PROTEIN 1, BETA                                         | 5.6714E-06 | 0.01284872 | 3.30  | 9.86  |
| HSPA4L   | HEAT SHOCK 70KDA PROTEIN 4-LIKE                                          | 1.224E-05  | 0.01860425 | 2.38  | 5.21  |
| HSPA6    | HEAT SHOCK 70KDA PROTEIN 4                                               | 1.2407E-05 | 0.02812122 | 3.92  | 15.18 |
| HSPB1    | HEAT SHOCK 27KDA PROTEIN 1                                               | 1.6241E-08 | 0.00451601 | 4.77  | 27.38 |
| HSPD1    | HEAT SHOCK 60KDA PROTEIN 1 (CHAPERONIN)                                  | 2.7222E-07 | 0.03187818 | 2.83  | 7.09  |
| HSPE1    | HEAT SHOCK 10KDA PROTEIN 1 (CHAPERONIN 10)                               | 1.556E-05  | 0.00102442 | 2.26  | 4.80  |
| HSPH1    | HEAT SHOCK 105KDA/110KDA PROTEIN 1                                       | 2.0145E-06 | 0.01039226 | 3.01  | 8.05  |
| ID3      | INHIBITOR OF DNA BINDING 3, DOMINANT NEGATIVE HELIX-LOOP-HELIX PROTEIN   | 1.9089E-05 | 0.0252377  | -1.46 | 0.36  |
| ID4      | INHIBITOR OF DNA BINDING 4, DOMINANT NEGATIVE HELIX-LOOP-HELIX PROTEIN   | 2.9979E-05 | 0.00639813 | -1.57 | 0.34  |
| IDO1     | INDOLEAMINE 2,3-DIOXYGENASE 1                                            | 0.00098473 | 0.00102442 | 1.96  | 3.88  |
| IGF2     | INSULIN-LIKE GROWTH FACTOR 2 (SOMATOMEDIN A)                             | 0.00021338 | 0.00105921 | -1.16 | 0.45  |
| IGFBP4   | INSULIN-LIKE GROWTH FACTOR BINDING PROTEIN 4                             | 0.00027887 | 0.01292628 | -1.32 | 0.40  |
| IGHV@    | IMMUNOGLOBULIN HEAVY LOCUS                                               | 5.2127E-05 | 0.0018247  | 2.04  | 4.11  |
| IGSF8    | IMMUNOGLOBULIN SUPERFAMILY, MEMBER 1                                     | 6.4793E-05 | 0.03323756 | -1.62 | 0.33  |
| IL1B     | INTERLEUKIN 1, BETA                                                      | 0.00051104 | 0.00163569 | -2.41 | 0.19  |
| IL27     | APOLIPOPROTEIN B RECEPTOR                                                | 7.5877E-05 | 0.0044758  | 2.23  | 4.69  |
| IL2RG    | INTERLEUKIN 2 RECEPTOR, GAMMA                                            | 0.00025762 | 0.0096697  | 1.77  | 3.42  |
| IL4R     | INTERLEUKIN 4 RECEPTOR                                                   | 0.00235001 | 0.03922855 | 1.35  | 2.55  |
| IL8      | INTERLEUKIN 8                                                            | 0.00035085 | 0.00429584 | -2.97 | 0.13  |
| IMPA1    | INOSITOL(MYO)-1(OR 4)-MONOPHOSPHATASE 1                                  | 0.00496656 | 0.00525317 | -1.01 | 0.50  |
| ING4     | INHIBITOR OF GROWTH FAMILY, MEMBER 4                                     | 0.00134264 | 0.04681602 | 1.06  | 2.08  |
| IP6K2    | DIPHOSPHOINOSITOL PENTAKISPHOSPHATE KINASE 2                             | 0.00094198 | 0.00338984 | 1.27  | 2.41  |
| IRF2     | INTERFERON REGULATORY FACTOR 2                                           | 6.0146E-05 | 0.00385418 | 1.28  | 2.42  |
| IRF4     | INTERFERON REGULATORY FACTOR 4                                           | 6.0449E-05 | 0.00075523 | 1.05  | 2.08  |
| IRF8     | INTERFERON REGULATORY FACTOR 8                                           | 1.3462E-06 | 0.00493628 | -2.26 | 0.22  |
| ITFG1    | INTEGRIN ALPHA FG-GAP REPEAT CONTAINING 1                                | 0.00094998 | 0.02049928 | -1.08 | 0.47  |
| JAG1     | JAGGED 1                                                                 | 9.857E-05  | 0.00211828 | -1.59 | 0.33  |
| JAGN1    | JAGUNAL HOMOLOG 1                                                        | 2.4358E-05 | 0.00416645 | 1.53  | 2.89  |
| KANK1    | KN MOTIF AND ANKYRIN REPEAT DOMAINS 1                                    | 0.00226419 | 0.02533813 | -1.53 | 0.35  |
| KCNAB2   | POTASSIUM VOLTAGE-GATED CHANNEL, SHAKER-RELATED SUBFAMILY, BETA MEMBER 2 | 6.6994E-07 | 0.00730612 | -2.81 | 0.14  |
| KCNJ2    | POTASSIUM INWARDLY-RECTIFYING CHANNEL, SUBFAMILY J, MEMBER 2             | 3.2161E-05 | 0.00370702 | -1.30 | 0.41  |
| KCTD10   | POTASSIUM CHANNEL TETRAMERISATION DOMAIN CONTAINING 10                   | 0.00286381 | 0.00385961 | 1.05  | 2.07  |
| KIAA0323 | KH AND NYN DOMAIN CONTAINING                                             | 0.00028995 | 0.02750815 | 1.00  | 2.01  |
| KIF15    | KINESIN FAMILY MEMBER 15                                                 | 6.7766E-05 | 0.03663162 | -1.00 | 0.50  |
| KLF4     | KRUPPEL-LIKE FACTOR 4                                                    | 0.00023328 | 0.00275565 | -1.61 | 0.33  |
| KLF5     | KRUPPEL-LIKE FACTOR 5                                                    | 6.6568E-06 | 0.01864012 | -1.95 | 0.26  |
| KPNA2    | KARYOPHERIN (IMPORTIN) ALPHA 2;                                          | 0.00017843 | 0.00153089 | 1.14  | 2.20  |
| KTELC1   | KTEL (LYS-TYR-GLU-LEU) CONTAINING 1                                      | 0.00099527 | 0.00395998 | 1.15  | 2.21  |
| KYNU     | KYNURENINASE (L-KYNURENINE HYDROLASE)                                    | 0.00021992 | 0.00370702 | 1.36  | 2.57  |
| LAMP1    | LYSOSOMAL-ASSOCIATED MEMBRANE PROTEIN 1                                  | 7.3598E-05 | 0.00385418 | 1.40  | 2.65  |
| LAMP2    | LYSOSOMAL-ASSOCIATED MEMBRANE PROTEIN 2                                  | 0.0002512  | 0.00262939 | 1.43  | 2.69  |
| LBR      | LAMIN B RECEPTOR                                                         | 3.2162E-05 | 0.02220559 | -1.70 | 0.31  |
| LCAT     | LECITHIN-CHOLESTEROL ACYLTRANSFERASE                                     | 0.00078663 | 0.00245626 | 1.26  | 2.39  |
| LCP1     | LYMPHOCYTE CYTOSOLIC PROTEIN 1 (L-PLASTIN)                               | 0.0002025  | 0.03968942 | 1.06  | 2.09  |
| LFNG     | LFNG O-FUCOSYLPEPTIDE 3-BETA-N-ACETYLGLUCOSAMINYLTRANSFERASE             | 0.00010974 | 0.00310767 | -1.22 | 0.43  |
| LGALS1   | LECTIN, GALACTOSE BINDING, SOLUBLE 1                                     | 2.9236E-06 | 0.0218432  | 2.11  | 4.32  |
| LMNA     | LAMIN A/C                                                                | 8.85E-05   | 0.00966499 | -1.25 | 0.42  |
| LMO7     | LIM DOMAIN 7                                                             | 1.6651E-05 | 0.00153814 | -1.11 | 0.46  |
| LONP2    | LON PEPTIDASE 2, PEROXISOMAL                                             | 0.00058211 | 0.00678869 | 1.28  | 2.42  |
| LRP1     | LOW DENSITY LIPOPROTEIN RECEPTOR-RELATED PROTEIN 1                       | 0.00184999 | 0.00625359 | -1.46 | 0.36  |
| LRRN1    | LEUCINE RICH REPEAT NEURONAL 1                                           | 1.4278E-06 | 0.03389324 | -1.98 | 0.25  |
| LSR      | LIPOLYSIS STIMULATED LIPOPROTEIN RECEPTOR                                | 0.00088775 | 0.00048516 | -1.44 | 0.37  |
| LYST     | LYSOSOMAL TRAFFICKING REGULATOR                                          | 0.00092079 | 0.00048516 | 1.09  | 2.13  |
| M6PR     | MANNOSE-6-PHOSPHATE RECEPTOR (CATION DEPENDENT)                          | 0.00174715 | 0.01696415 | 1.16  | 2.23  |
| MAFG     | V-MAF MUSCULOAPONEUROTIC FIBROSARCOMA ONCOGENE HOMOLOG G                 | 0.00073494 | 0.00020392 | -1.04 | 0.49  |
| MAN2C1   | MANNOSIDASE, ALPHA, CLASS 2C, MEMBER 1                                   | 0.00056627 | 0.0044758  | -1.01 | 0.50  |
| MAP2K1   | MITOGEN-ACTIVATED PROTEIN KINASE KINASE 1                                | 0.0003526  | 0.00525317 | -1.03 | 0.49  |
| MAP4K2   | MITOGEN-ACTIVATED PROTEIN KINASE KINASE KINASE 2                         | 0.00046975 | 0.01855599 | -1.06 | 0.48  |
| MAP7D1   | MAP7 DOMAIN CONTAINING 1                                                 | 0.00253344 | 0.02022632 | 1.06  | 2.08  |
| MAPK11   | MITOGEN-ACTIVATED PROTEIN KINASE 11                                      | 1.1861E-06 | 0.03604289 | 1.94  | 3.83  |
| MAPK14   | MITOGEN-ACTIVATED PROTEIN KINASE 14                                      | 0.00142509 | 0.0463822  | 1.01  | 2.01  |
| MCMBP    | MINICHROMOSOME MAINTENANCE COMPLEX BINDING PROTEIN                       | 0.00269333 | 0.0460489  | -1.66 | 0.32  |
| MED6     | MEDIATOR COMPLEX SUBUNIT 6                                               | 5.1132E-05 | 0.00372851 | 1.17  | 2.24  |
| MED8     | MEDIATOR COMPLEX SUBUNIT 8                                               | 0.00159336 | 0.00489157 | 1.01  | 2.02  |
| MERTK    | C-MER PROTO-ONCOGENE TYROSINE KINASE                                     | 9.0528E-05 | 0.01468279 | -1.48 | 0.36  |

|         |                                                                                   |            |            |       |       |
|---------|-----------------------------------------------------------------------------------|------------|------------|-------|-------|
| METTL7A | METHYLTRANSFERASE LIKE 7A                                                         | 2.7886E-06 | 0.03691547 | -2.09 | 0.23  |
| MGEA5   | SIMILAR TO MENINGIOMA EXPRESSED ANTIGEN 5 (HYALURONIDASE)                         | 1.8843E-05 | 0.04343983 | 1.37  | 2.59  |
| MORF4L2 | MORTALITY FACTOR 4 LIKE 2                                                         | 2.8007E-05 | 0.00428415 | 1.64  | 3.20  |
| MOV10   | MOV10L1, MOLONEY LEUKEMIA VIRUS 10-LIKE 1, HOMOLOG                                | 0.00095664 | 0.01399381 | 1.33  | 2.52  |
| MPZL1   | MYELIN PROTEIN ZERO-LIKE 1                                                        | 0.00204844 | 0.01883506 | -1.24 | 0.42  |
| MRC1    | MANNOSE RECEPTOR, C TYPE 1                                                        | 0.00531453 | 0.00632575 | -1.47 | 0.36  |
| MRPL1   | MITOCHONDRIAL RIBOSOMAL PROTEIN L1                                                | 0.00044272 | 0.00372249 | 1.11  | 2.16  |
| MRPL14  | MITOCHONDRIAL RIBOSOMAL PROTEIN L14                                               | 0.00480669 | 0.00431753 | 1.13  | 2.18  |
| MRPL18  | MITOCHONDRIAL RIBOSOMAL PROTEIN L18                                               | 0.00044812 | 0.00102442 | 1.23  | 2.35  |
| MRPL34  | MITOCHONDRIAL RIBOSOMAL PROTEIN L34                                               | 2.2011E-05 | 0.00539712 | 1.05  | 2.07  |
| MRPS11  | MITOCHONDRIAL RIBOSOMAL PROTEIN S11                                               | 0.0003652  | 0.0493792  | 1.05  | 2.06  |
| MRRF    | MITOCHONDRIAL RIBOSOME RECYCLING FACTOR                                           | 0.00134184 | 0.00233427 | 1.15  | 2.23  |
| MT2A    | METALLOTHIONEIN 2A                                                                | 0.00111425 | 0.01191051 | 2.13  | 4.37  |
| MTA3    | METASTASIS ASSOCIATED 1 FAMILY, MEMBER 3                                          | 6.1379E-05 | 0.00426148 | 1.01  | 2.02  |
| MT-ND2  | MITOCHONDIALLY ENCODED NADH DEHYDROGENASE 2                                       | 7.0194E-05 | 0.0328315  | -1.56 | 0.34  |
| MT-ND3  | NADH DEHYDROGENASE (UBIQUINONE) FE-S PROTEIN 1, 75KDA (NADH-COENZYME Q REDUCTASE) | 3.7835E-06 | 0.00170347 | -2.11 | 0.23  |
| MT-ND5  | MITOCHONDIALLY ENCODED NADH DEHYDROGENASE 5                                       | 2.3701E-06 | 0.00385961 | -2.07 | 0.24  |
| MX2     | MYXOVIRUS (INFLUENZA VIRUS) RESISTANCE 2                                          | 3.8605E-06 | 0.01936126 | 3.42  | 10.71 |
| MXRA7   | MATRIX-REMODELLING ASSOCIATED 7                                                   | 9.1256E-06 | 0.03389324 | -1.76 | 0.29  |
| MYC     | V-MYC MYELOCYTOMATOSIS VIRAL ONCOGENE HOMOLOG                                     | 0.00345432 | 0.00385418 | -1.14 | 0.46  |
| MYD88   | MYELOID DIFFERENTIATION PRIMARY RESPONSE GENE (88)                                | 7.7801E-05 | 0.00912934 | 1.28  | 2.43  |
| MYST1   | MYST HISTONE ACETYLTRANSFERASE 1                                                  | 0.00256845 | 0.00678869 | 1.01  | 2.01  |
| N4BP2L1 | NEDD4 BINDING PROTEIN 2-LIKE 1                                                    | 9.4648E-06 | 0.00020392 | 1.31  | 2.48  |
| NAGA    | N-ACETYLGALACTOSAMINIDASE, ALPHA-                                                 | 0.00166946 | 0.00782856 | 1.10  | 2.15  |
| NAMPT   | NICOTINAMIDE PHOSPHORIBOSYLTRANSFERASE                                            | 0.00023036 | 0.01468279 | -1.17 | 0.44  |
| NASP    | NUCLEAR AUTOANTIGENIC SPERM PROTEIN (HISTONE-BINDING)                             | 0.00010116 | 0.0175036  | -1.48 | 0.36  |
| NAT10   | N-ACETYLTRANSFERASE 10                                                            | 0.00364139 | 0.02667232 | -1.16 | 0.45  |
| NCS1    | NEURONAL CALCIUM SENSOR 1                                                         | 0.00029375 | 0.00040365 | -1.08 | 0.47  |
| NDRG1   | N-MYC DOWNSTREAM REGULATED GENE 1                                                 | 2.5086E-05 | 0.00102442 | -1.56 | 0.34  |
| NDUFS1  | NADH DEHYDROGENASE (UBIQUINONE) FE-S PROTEIN 1, 75KDA (NADH-COENZYME Q REDUCTASE) | 0.00067541 | 0.00442405 | -1.34 | 0.40  |
| NDUFV2  | NADH DEHYDROGENASE (UBIQUINONE) FLAVOPROTEIN 2, 24KDA                             | 1.1398E-05 | 0.00680435 | 1.62  | 3.08  |
| NEDD9   | NEURAL PRECURSOR CELL EXPRESSED, DEVELOPMENTALLY DOWN-REGULATED GENE 9            | 4.3248E-05 | 0.01612454 | -1.86 | 0.28  |
| NEIL3   | NEI LIKE 3                                                                        | 0.00012023 | 0.0314194  | -1.16 | 0.45  |
| NGFRAP1 | NERVE GROWTH FACTOR RECEPTOR (TNFRSF16) ASSOCIATED PROTEIN 1                      | 7.6084E-05 | 0.01261829 | -1.85 | 0.28  |
| NGRN    | NEUGRIN, NEURITE OUTGROWTH ASSOCIATED                                             | 0.00016429 | 0.00225939 | 1.76  | 3.40  |
| NKG7    | NATURAL KILLER CELL GROUP 7 SEQUENCE                                              | 0.00277563 | 0.01066198 | 1.09  | 2.13  |
| NLRC5   | NLR FAMILY, CARD DOMAIN CONTAINING 5                                              | 0.00371414 | 0.00639813 | 1.07  | 2.10  |
| NMI     | N-MYC (AND STAT) INTERACTOR                                                       | 6.9206E-05 | 0.00822753 | 1.18  | 2.27  |
| NOL3    | NUCLEOLAR PROTEIN 3 (APOPTOSIS REPRESSOR WITH CARD DOMAIN)                        | 1.6297E-05 | 0.01859361 | 1.69  | 3.22  |
| NPLOC4  | NUCLEAR PROTEIN LOCALIZATION 4 HOMOLOG                                            | 4.4441E-05 | 0.01902281 | 1.31  | 2.52  |
| NR4A1   | NUCLEAR RECEPTOR SUBFAMILY 4, GROUP A, MEMBER 1                                   | 8.9261E-05 | 0.01558698 | -1.95 | 0.26  |
| NSA2    | NSA2 ribosome biogenesis homolog                                                  | 0.00011219 | 0.01106121 | -1.18 | 0.44  |
| NUDC    | NUCLEAR DISTRIBUTION GENE C HOMOLOG                                               | 0.00520554 | 0.04200999 | 1.20  | 2.29  |
| NUPR1   | NUCLEAR PROTEIN, TRANSCRIPTIONAL REGULATOR, 1                                     | 1.3425E-06 | 0.00428824 | 2.18  | 4.52  |
| NXF1    | NUCLEAR RNA EXPORT FACTOR 1                                                       | 0.00117    | 0.0218432  | 1.47  | 2.78  |
| NXN     | NUCLEOREDOXIN                                                                     | 4.9058E-06 | 0.00233427 | 1.81  | 3.51  |
| P4HA2   | PROLYL 4-HYDROXYLASE, ALPHA POLYPEPTIDE II                                        | 0.00529587 | 0.01106121 | 1.05  | 2.07  |
| PAF1    | RTF1, PAF1/RNA POLYMERASE II COMPLEX COMPONENT, HOMOLOG                           | 5.4021E-05 | 0.00153089 | -1.04 | 0.49  |
| PALLD   | PALLADIN, CYTOSKELETAL ASSOCIATED PROTEIN                                         | 0.00272825 | 0.02572013 | -1.54 | 0.34  |
| PAPD5   | PAP ASSOCIATED DOMAIN CONTAINING 5                                                | 6.4519E-05 | 0.00233427 | 1.14  | 2.21  |
| PARP14  | POLY (ADP-RIBOSE) POLYMERASE FAMILY, MEMBER 14                                    | 0.00029164 | 0.03393221 | 1.01  | 2.01  |
| PARP9   | POLY (ADP-RIBOSE) POLYMERASE FAMILY, MEMBER 9                                     | 8.3213E-06 | 0.0005689  | 1.49  | 2.80  |
| PBXIP1  | PRE-B-CELL LEUKEMIA HOMEBOX INTERACTING PROTEIN 1                                 | 0.00090436 | 0.00754784 | -1.02 | 0.49  |
| PDE4B   | PHOSPHODIESTERASE 4B, CAMP-SPECIFIC                                               | 8.0531E-06 | 0.00260718 | -2.24 | 0.21  |
| PDE4D   | PHOSPHODIESTERASE 4D, CAMP-SPECIFIC                                               | 5.8066E-05 | 0.03903799 | -1.05 | 0.48  |
| PK4     | PYRUVATE DEHYDROGENASE KINASE, ISOZYME 4                                          | 0.00338346 | 0.01093752 | 1.32  | 2.50  |
| PDLIM4  | PDZ AND LIM DOMAIN 4                                                              | 0.00017775 | 0.01601083 | -2.12 | 0.23  |
| PFDN2   | PREFOLDIN SUBUNIT 2                                                               | 0.00078976 | 0.00906022 | -1.70 | 0.31  |
| PFKL    | PHOSPHOFRUCTOKINASE, LIVER                                                        | 0.00021407 | 0.02314472 | -1.24 | 0.42  |
| PGCP    | PLASMA GLUTAMATE CARBOXYPEPTIDASE                                                 | 3.3921E-05 | 0.04992563 | -1.56 | 0.34  |
| PGM3    | PHOSPHOGLUCOMUTASE 3                                                              | 4.3874E-05 | 0.0156222  | -1.61 | 0.33  |
| PGS1    | PHOSPHATIDYLGLYCEROPHOSPHATE SYNTHASE 1                                           | 2.6998E-05 | 0.02344764 | 1.45  | 2.73  |
| PHACTR1 | PHOSPHATASE AND ACTIN REGULATOR 1                                                 | 2.8584E-05 | 0.0075114  | -1.47 | 0.36  |
| PHKG2   | PHOSPHORYLASE KINASE, GAMMA 2                                                     | 1.2588E-06 | 0.00426148 | -2.18 | 0.22  |
| PHYH    | PHYTANOYL-CoA 2-HYDROXYLASE                                                       | 0.00379461 | 0.03056508 | 1.79  | 3.46  |
| PIAS1   | PROTEIN INHIBITOR OF ACTIVATED STAT, 1                                            | 0.00113382 | 0.01468279 | 1.46  | 2.75  |

|          |                                                                                   |            |            |       |       |
|----------|-----------------------------------------------------------------------------------|------------|------------|-------|-------|
| PIAS3    | PROTEIN INHIBITOR OF ACTIVATED STAT, 3                                            | 0.00323267 | 0.01675604 | 1.06  | 2.08  |
| PICALM   | PHOSPHATIDYLINOSITOL BINDING CLATHRIN ASSEMBLY PROTEIN                            | 9.7153E-05 | 5.8781E-05 | -1.25 | 0.42  |
| PITPNA   | PHOSPHATIDYLINOSITOL TRANSFER PROTEIN, ALPHA                                      | 0.00096338 | 0.01468279 | 1.09  | 2.13  |
| PLA2G2A  | PHOSPHOLIPASE A2, GROUP IIA                                                       | 3.8078E-05 | 0.01106353 | 3.28  | 9.74  |
| PLCB2    | PHOSPHOLIPASE C, BETA 2                                                           | 0.0013623  | 0.04343983 | -1.55 | 0.34  |
| PLEKHJ1  | PLECKSTRIN HOMOLOGY DOMAIN CONTAINING, FAMILY J MEMBER 1                          | 0.00129857 | 0.02716827 | 1.19  | 2.28  |
| PLOD1    | PROCOLLAGEN-LYSINE 1, 2-OXOGLUTARATE 5-DIOXYGENASE 1                              | 3.8213E-05 | 0.03534727 | 3.20  | 10.78 |
| POLR1D   | POLYMERASE (RNA) I POLYPEPTIDE D, 16kDA                                           | 0.00015267 | 0.01764188 | 1.07  | 2.11  |
| POLR2H   | POLYMERASE (RNA) II (DNA DIRECTED) POLYPEPTIDE H                                  | 0.00013405 | 0.01039226 | 1.10  | 2.15  |
| PON2     | PARAOXONASE 2                                                                     | 0.00169463 | 0.01883506 | 1.10  | 2.14  |
| PPARG    | PEROXISOME PROLIFERATOR-ACTIVATED RECEPTOR GAMMA                                  | 0.00334329 | 0.02288489 | 1.19  | 2.28  |
| PPP1CC   | PROTEIN PHOSPHATASE 1, CATALYTIC SUBUNIT, GAMMA ISOFORM                           | 5.6605E-05 | 0.00717306 | -1.30 | 0.41  |
| PPP1R16B | PROTEIN PHOSPHATASE 1, REGULATORY (INHIBITOR) SUBUNIT 16B                         | 4.5356E-05 | 0.01406117 | -1.40 | 0.38  |
| PPP3CA   | PROTEIN PHOSPHATASE 3, CATALYTIC SUBUNIT, ALPHA ISOZYME                           | 8.6962E-05 | 0.02758013 | 1.01  | 2.01  |
| PRDM1    | PR DOMAIN CONTAINING 1, WITH ZNF DOMAIN                                           | 6.5406E-07 | 0.00385418 | 1.58  | 2.98  |
| PRDX2    | PEROXIREDOXIN 2                                                                   | 0.00194148 | 0.00411584 | 1.30  | 2.47  |
| PRKAG1   | PROTEIN KINASE, AMP-ACTIVATED, GAMMA 1 NON-CATALYTIC SUBUNIT                      | 0.00500821 | 0.03187818 | 1.01  | 2.02  |
| PRKCDBP  | PROTEIN KINASE C, DELTA BINDING PROTEIN                                           | 0.00510194 | 0.02004247 | 1.24  | 2.36  |
| PSMB9    | TRANSMEMBRANE 9 SUPERFAMILY MEMBER 2                                              | 0.00076112 | 0.0018681  | -1.00 | 0.50  |
| PSMC4    | PROTEASOME (PROSOME, MACROPAIN) 26S SUBUNIT, NON-ATPASE, 4                        | 0.00093229 | 0.02041869 | 1.08  | 2.11  |
| PSPC1    | PARASPECKLE COMPONENT 1; PARASPECKLE PROTEIN 1 PSEUDOGENE                         | 5.2673E-05 | 0.04308805 | -1.09 | 0.47  |
| PSPH     | PHOSPHOSERINE PHOSPHATASE                                                         | 2.2127E-05 | 0.01648521 | 1.20  | 2.29  |
| PTGES3   | PROSTAGLANDIN E SYNTHASE 3 (CYTOSOLIC)                                            | 0.00149337 | 0.00199372 | 1.11  | 2.17  |
| PTGS2    | PROSTAGLANDIN-ENDOPEROXIDE SYNTHASE 2                                             | 0.00021748 | 0.00712006 | -1.66 | 0.32  |
| PTMA     | NADH DEHYDROGENASE (UBIQUINONE) FE-S PROTEIN 1, 75kDA (NADH-COENZYME Q REDUCTASE) | 0.00047428 | 0.00290395 | -1.46 | 0.36  |
| PTOV1    | PROSTATE TUMOR OVEREXPRESSED 1                                                    | 0.00010109 | 0.04065153 | 1.62  | 3.08  |
| PTPLAD1  | PROTEIN TYROSINE PHOSPHATASE-LIKE A DOMAIN CONTAINING 1                           | 0.00059079 | 0.01305222 | 1.45  | 2.74  |
| PXN      | PAXILLIN                                                                          | 3.0338E-05 | 0.03275664 | -1.49 | 0.36  |
| PYGL     | LIVER GLYCOGEN PHOSPHORYLASE                                                      | 4.1243E-05 | 0.0018681  | 1.05  | 2.07  |
| PYHIN1   | INTERFERON, GAMMA-INDUCIBLE PROTEIN 16                                            | 3.6148E-05 | 0.02322825 | 2.43  | 5.40  |
| RAB7B    | RAB7B, MEMBER RAS ONCOGENE FAMILY                                                 | 6.8454E-05 | 0.02118548 | -1.43 | 0.37  |
| RAB8A    | RAB8A, MEMBER RAS ONCOGENE FAMILY                                                 | 0.00011265 | 0.00222702 | 1.07  | 2.10  |
| RAB9A    | RAB40C, MEMBER RAS ONCOGENE FAMILY                                                | 0.00447247 | 0.00679417 | 1.65  | 3.13  |
| RABEPK   | RAB9 EFFECTOR PROTEIN WITH KELCH MOTIFS                                           | 0.00053663 | 0.01257997 | 1.74  | 3.34  |
| RAD23A   | RAD23 HOMOLOG A                                                                   | 0.00098213 | 0.03082988 | -1.04 | 0.49  |
| RASSF2   | RAS ASSOCIATION (RALGDS/AF-6) DOMAIN FAMILY MEMBER 2                              | 0.00013893 | 0.03251635 | 1.54  | 2.92  |
| RASSF5   | RAS ASSOCIATION (RALGDS/AF-6) DOMAIN FAMILY MEMBER 5                              | 4.5038E-05 | 0.00251171 | -1.46 | 0.36  |
| RBM3     | RNA BINDING MOTIF (RNP1, RRM) PROTEIN 3                                           | 5.5754E-05 | 0.00141885 | -1.95 | 0.26  |
| RBM39    | RNA BINDING MOTIF PROTEIN 39                                                      | 0.00104907 | 0.00518424 | 1.05  | 2.07  |
| RBM48    | CHROMOSOME 7 OPEN READING FRAME 64 ORTHOLOG                                       | 0.00036315 | 0.00202909 | 1.15  | 2.22  |
| RETSAT   | RETINOL SATURASE (ALL-TRANS-RETINOL 13,14-REDUCTASE)                              | 0.00567887 | 0.03464997 | -1.10 | 0.47  |
| RFC2     | REPLICATION FACTOR C (ACTIVATOR 1) 2, 40kDA                                       | 0.00010611 | 0.02549955 | 1.72  | 3.29  |
| RGMB     | RGM DOMAIN FAMILY, MEMBER B                                                       | 2.0568E-05 | 0.00801373 | -1.82 | 0.28  |
| RIPK1    | RECEPTOR-INTERACTING SERINE-THREONINE KINASE 2                                    | 6.9924E-05 | 0.02827435 | 1.32  | 2.49  |
| RIPK3    | RECEPTOR-INTERACTING SERINE-THREONINE KINASE 3                                    | 3.938E-06  | 0.0017708  | 1.86  | 3.62  |
| RNASE4   | ANGIOGENIN, RIBONUCLEASE, RNASE A FAMILY, 5                                       | 3.0684E-05 | 0.00102442 | -1.65 | 0.32  |
| RNF114   | RING FINGER PROTEIN 114                                                           | 0.00135661 | 0.04658188 | 1.01  | 2.01  |
| RNF216L  | RING FINGER PROTEIN 216-LIKE                                                      | 0.00018558 | 0.04094377 | 1.02  | 2.02  |
| ROBLD3   | LATE ENDOSOMAL/LYSOSOMAL ADAPTOR, MAPK AND MTOR ACTIVATOR 2                       | 0.00389896 | 0.01106353 | 1.16  | 2.23  |
| RPL18A   | RIBOSOMAL PROTEIN L18A                                                            | 0.00269638 | 0.00385961 | -1.03 | 0.49  |
| RPL6     | RIBOSOMAL PROTEIN L6                                                              | 0.00053492 | 0.04625839 | -1.03 | 0.49  |
| RPS4X    | RIBOSOMAL PROTEIN S4, X-LINKED                                                    | 7.6848E-05 | 0.00632575 | -1.26 | 0.42  |
| RRP7A    | RIBOSOMAL RNA PROCESSING 7 HOMOLOG A                                              | 0.00319952 | 0.00912934 | -1.09 | 0.47  |
| RTN3     | RETICULON 3                                                                       | 2.0337E-05 | 0.03017159 | -1.34 | 0.39  |
| RTP4     | RECEPTOR (CHEMOSENSORY) TRANSPORTER PROTEIN 4                                     | 7.465E-07  | 0.00087238 | 2.94  | 7.66  |
| RYBP     | RING1 AND YY1 BINDING PROTEIN                                                     | 1.0081E-05 | 0.01860025 | -1.45 | 0.37  |
| S100A10  | S100 CALCIUM BINDING PROTEIN A10                                                  | 8.7231E-05 | 0.01468279 | 1.13  | 2.19  |
| S100A4   | S100 CALCIUM BINDING PROTEIN A4                                                   | 0.00104521 | 0.00385961 | -1.42 | 0.37  |
| S1PR3    | SPHINGOSINE-1-PHOSPHATE RECEPTOR 3                                                | 0.00094877 | 0.00816314 | -1.36 | 0.39  |
| SAP30    | SIN3A-ASSOCIATED PROTEIN, 30kDA                                                   | 0.00011217 | 0.03365428 | -1.93 | 0.26  |
| SARM1    | STERILE ALPHA AND TIR MOTIF CONTAINING 1                                          | 0.00065437 | 0.00481401 | -1.24 | 0.42  |
| SATB1    | SATB HOMEBOX 1                                                                    | 0.00286281 | 0.00913784 | -1.00 | 0.50  |
| SBNO2    | STRAWBERRY NOTCH HOMOLOG 2                                                        | 0.00036003 | 0.00385418 | 1.19  | 2.29  |
| SCAND1   | SCAN DOMAIN CONTAINING 1                                                          | 4.8941E-05 | 0.0127329  | -2.07 | 0.24  |
| SDC2     | SYNDECAN 2                                                                        | 3.5736E-05 | 0.01462027 | -1.16 | 0.45  |
| SDF2L1   | STROMAL CELL-DERIVED FACTOR 2-LIKE 1                                              | 0.00423094 | 0.00230817 | -1.03 | 0.49  |

|          |                                                                                                                  |            |            |       |       |
|----------|------------------------------------------------------------------------------------------------------------------|------------|------------|-------|-------|
| SDHAF1   | SUCCINATE DEHYDROGENASE COMPLEX ASSEMBLY FACTOR 1                                                                | 6.8801E-05 | 0.02027197 | 1.04  | 2.05  |
| SDHAF2   | SUCCINATE DEHYDROGENASE COMPLEX ASSEMBLY FACTOR 1                                                                | 0.00130023 | 0.00022809 | 1.07  | 2.11  |
| SDHC     | SUCCINATE DEHYDROGENASE COMPLEX, SUBUNIT C, INTEGRAL MEMBRANE PROTEIN, 15kDA                                     | 2.0507E-05 | 0.00521065 | 1.01  | 2.01  |
| SEMA4D   | SEMA DOMAIN, IMMUNOGLOBULIN DOMAIN (IG), TRANSMEMBRANE DOMAIN (TM) AND SHORT CYTOPLASMIC DOMAIN, (SEMAPHORIN) 4D | 0.00247055 | 0.002665   | -1.28 | 0.41  |
| SERF1A   | SMALL EDRK-RICH FACTOR 1A (TELOMERIC); SMALL EDRK-RICH FACTOR 1B (CENTROMERIC)                                   | 8.1677E-06 | 0.00214459 | 1.21  | 2.32  |
| SERPINB1 | SERPIN PEPTIDASE INHIBITOR, CLADE B (OVALBUMIN), MEMBER 1                                                        | 0.00025991 | 0.0180252  | -1.31 | 0.40  |
| SERPINE1 | SERPIN PEPTIDASE INHIBITOR, CLADE E (NEXIN, PLASMINOGEN ACTIVATOR INHIBITOR TYPE 1), MEMBER 1                    | 0.00015434 | 0.00524706 | -1.68 | 0.31  |
| SERPINH1 | SERPIN PEPTIDASE INHIBITOR, CLADE H (HEAT SHOCK PROTEIN 47), MEMBER 1, (COLLAGEN BINDING PROTEIN 1)              | 8.5354E-06 | 0.00195948 | 3.37  | 10.30 |
| SESN2    | SESTRIN 2                                                                                                        | 0.00078921 | 0.01023203 | -1.12 | 0.46  |
| SFRS5    | SPLICING FACTOR, ARGININE/SERINE-RICH 5                                                                          | 0.00065697 | 0.00878802 | -1.02 | 0.49  |
| SGMS1    | SPHINGOMYELIN SYNTHASE 1                                                                                         | 0.00021731 | 0.00423504 | 1.09  | 2.13  |
| SH3D20   | RHO GTPASE ACTIVATING PROTEIN 27                                                                                 | 0.00040514 | 0.00709679 | 1.16  | 2.24  |
| SHISA5   | SHISA HOMOLOG 5                                                                                                  | 1.2135E-07 | 0.01066198 | 3.48  | 11.17 |
| SIK3     | SIK FAMILY KINASE 3                                                                                              | 0.00084671 | 0.00020392 | 1.34  | 2.53  |
| SLAMF1   | SIGNALING LYMPHOCYTIC ACTIVATION MOLECULE FAMILY MEMBER 1                                                        | 0.00059668 | 0.00733418 | 1.20  | 2.29  |
| SLAMF7   | SLAM FAMILY MEMBER 7                                                                                             | 5.043E-07  | 0.01742992 | 2.72  | 6.59  |
| SLC15A4  | SOLUTE CARRIER FAMILY 15, MEMBER 4                                                                               | 0.0007072  | 0.02752311 | 1.44  | 2.70  |
| SLC2A1   | SOLUTE CARRIER FAMILY 2 (FACILITATED GLUCOSE TRANSPORTER), MEMBER 1                                              | 1.4898E-06 | 0.01916645 | -2.07 | 0.24  |
| SLC38A2  | SOLUTE CARRIER FAMILY 38, MEMBER 2                                                                               | 2.944E-05  | 0.03601084 | -1.59 | 0.33  |
| SLC39A6  | SOLUTE CARRIER FAMILY 39 (ZINC TRANSPORTER), MEMBER 6                                                            | 0.00250188 | 0.04099942 | 1.04  | 2.06  |
| SLC44A4  | SOLUTE CARRIER FAMILY 44, MEMBER 4                                                                               | 0.00055585 | 0.03369073 | -1.29 | 0.41  |
| SLC4A7   | SOLUTE CARRIER FAMILY 4, SODIUM BICARBONATE COTRANSPORTER, MEMBER 7                                              | 0.00045397 | 0.00205232 | -1.65 | 0.32  |
| SLC7A1   | SOLUTE CARRIER FAMILY 7 MEMBER 1                                                                                 | 1.83E-05   | 0.00225939 | -1.73 | 0.30  |
| SLC7A6OS | SOLUTE CARRIER FAMILY 7, MEMBER 6 OPPOSITE STRAND                                                                | 0.00033652 | 0.00117341 | 1.08  | 2.12  |
| SMAGP    | SMALL CELL ADHESION GLYCOPROTEIN                                                                                 | 4.0138E-06 | 0.00128732 | 1.88  | 3.67  |
| SNAP25   | SYNAPTOSOMAL-ASSOCIATED PROTEIN, 25KDA                                                                           | 2.047E-05  | 0.00022999 | -1.29 | 0.41  |
| SNRK     | SNF RELATED KINASE                                                                                               | 0.00015615 | 0.00205232 | -1.41 | 0.38  |
| SNRPC    | SMALL NUCLEAR RIBONUCLEOPROTEIN POLYPEPTIDE C                                                                    | 7.3356E-05 | 0.00709679 | 1.01  | 2.02  |
| SNX12    | SORTING NEXIN 12                                                                                                 | 0.00014178 | 0.00815927 | 1.10  | 2.14  |
| SPARC    | SECRETED PROTEIN, ACIDIC, CYSTEINE-RICH (OSTEONECTIN)                                                            | 0.00143789 | 0.00942443 | -1.48 | 0.36  |
| SPRY1    | SPROUTY HOMOLOG 1, ANTAGONIST OF FGF SIGNALING                                                                   | 0.00100558 | 0.01093752 | -1.65 | 0.32  |
| SQLE     | SQUALENE EPOXIDASE                                                                                               | 5.2481E-05 | 0.01859361 | -2.01 | 0.25  |
| SSNA1    | SJOGREN SYNDROME NUCLEAR AUTOANTIGEN 1                                                                           | 0.00183977 | 0.00912934 | 1.02  | 2.02  |
| STAT4    | SIGNAL TRANSDUCER AND ACTIVATOR OF TRANSCRIPTION 1                                                               | 3.8116E-05 | 0.00297834 | -1.21 | 0.43  |
| STAT2    | SIGNAL TRANSDUCER AND ACTIVATOR OF TRANSCRIPTION 2, 113KDA                                                       | 0.00019858 | 0.00856955 | 1.25  | 2.38  |
| STIP1    | STRESS-INDUCED-PHOSPHOPROTEIN 1                                                                                  | 6.493E-05  | 0.00141885 | 2.05  | 4.15  |
| SULT1A1  | SULFOTRANSFERASE FAMILY, CYTOSOLIC, 1A, PHENOL-PREFERRING, MEMBER 1                                              | 7.9488E-06 | 0.00731426 | 1.47  | 2.77  |
| SUOX     | SULFITE OXIDASE                                                                                                  | 0.00035876 | 0.01894375 | -1.69 | 0.31  |
| SUPT4H1  | SUPPRESSOR OF TY 4 HOMOLOG 1                                                                                     | 0.00173689 | 0.00827868 | 1.75  | 3.36  |
| SYTL2    | SYNAPTOTAGMIN-LIKE 2                                                                                             | 0.0004455  | 0.02491994 | -1.55 | 0.34  |
| TBCB     | TUBULIN FOLDING COFACTOR B                                                                                       | 0.00143106 | 0.00297834 | 1.02  | 2.03  |
| TBL1X    | TRANSDUCIN (BETA)-LIKE 1X-LINKED                                                                                 | 6.7346E-05 | 0.00087238 | 1.28  | 2.43  |
| TCF7     | TRANSCRIPTION FACTOR 7 (T-CELL SPECIFIC, HMG-BOX)                                                                | 0.0001864  | 0.02671852 | -1.57 | 0.34  |
| TCIRG1   | T-CELL, IMMUNE REGULATOR 1, ATPASE, H+ TRANSPORTING, LYSOSOMAL V0 SUBUNIT A3                                     | 0.00288033 | 0.00075523 | 1.01  | 2.01  |
| TES      | TESTIS DERIVED TRANSCRIPT (3 LIM DOMAINS)                                                                        | 8.6038E-07 | 0.01835302 | 1.90  | 3.74  |
| TESC     | TESCALCIN; SIMILAR TO TESCALCIN                                                                                  | 0.00018716 | 0.01455568 | -1.47 | 0.36  |
| TGFBI    | TRANSFORMING GROWTH FACTOR, BETA-INDUCED, 68KDA                                                                  | 0.0023776  | 0.0257968  | 1.63  | 3.09  |
| TGM2     | TRANSGLUTAMINASE 2 (C POLYPEPTIDE, PROTEIN-GLUTAMINE-GAMMA-GLUTAMYLTRANSFERASE)                                  | 0.00552053 | 0.0109434  | -1.02 | 0.49  |
| THYN1    | THYMOCYTE NUCLEAR PROTEIN 1                                                                                      | 0.00368356 | 0.0328315  | -1.07 | 0.48  |
| TIAL1    | TIA1 CYTOTOXIC GRANULE-ASSOCIATED RNA BINDING PROTEIN-LIKE 1                                                     | 0.00035169 | 0.00495236 | -1.20 | 0.43  |
| TIMM22   | TRANSLOCASE OF INNER MITOCHONDRIAL MEMBRANE 22 HOMOLOG                                                           | 0.00059504 | 0.00225939 | 1.06  | 2.08  |
| TM9SF2   | TRANSMEMBRANE 9 SUPERFAMILY MEMBER 2                                                                             | 7.7302E-09 | 0.0021861  | 2.98  | 7.91  |
| TMEM120A | TRANSMEMBRANE PROTEIN 120A                                                                                       | 0.00022239 | 0.00340771 | 1.10  | 2.14  |
| TMEM134  | TRANSMEMBRANE PROTEIN 134                                                                                        | 0.00059198 | 0.00405847 | -1.18 | 0.44  |
| TMEM18   | TRANSMEMBRANE PROTEIN 18                                                                                         | 0.00036433 | 0.00431753 | -1.04 | 0.49  |
| TMEM55B  | TRANSMEMBRANE PROTEIN 55B                                                                                        | 0.00448652 | 0.00087238 | 1.39  | 2.62  |
| TMEM62   | TRANSMEMBRANE PROTEIN 62                                                                                         | 0.00189363 | 0.00161019 | 1.14  | 2.21  |
| TNNT3    | TROPONIN T TYPE 3                                                                                                | 0.00032322 | 0.03741692 | -1.05 | 0.48  |
| TOR3A    | TORSIN FAMILY 3, MEMBER A                                                                                        | 0.00145339 | 0.00852404 | 1.81  | 3.50  |
| TRAC     | T CELL RECEPTOR ALPHA CONSTANT                                                                                   | 0.00481973 | 0.03869901 | -1.48 | 0.36  |

|          |                                                                   |            |            |       |      |
|----------|-------------------------------------------------------------------|------------|------------|-------|------|
| TRAF3IP3 | TNF RECEPTOR-ASSOCIATED FACTOR 3                                  | 0.00069623 | 0.00262939 | -1.29 | 0.41 |
| TRAF5    | TNF RECEPTOR-ASSOCIATED FACTOR 5                                  | 0.00025599 | 0.00369505 | 1.18  | 2.27 |
| TRAPPC2L | TRAFFICKING PROTEIN PARTICLE COMPLEX 2-LIKE                       | 0.00577126 | 0.00574987 | 1.01  | 2.01 |
| TRAPPC3  | TRAFFICKING PROTEIN PARTICLE COMPLEX 3                            | 0.00065949 | 0.00703815 | 1.14  | 2.20 |
| TRAPPC5  | TRAFFICKING PROTEIN PARTICLE COMPLEX 5                            | 0.00149092 | 0.0055805  | -1.01 | 0.50 |
| TRIM5    | TRIPARTITE MOTIF-CONTAINING 5                                     | 0.00571162 | 0.00116573 | 1.25  | 2.38 |
| TRIM50   | TRIPARTITE MOTIF CONTAINING 50                                    | 0.00310288 | 0.04739857 | 1.66  | 3.17 |
| TRIM8    | TRIPARTITE MOTIF CONTAINING 8                                     | 0.00085611 | 0.0330276  | -1.22 | 0.43 |
| TRIP12   | THYROID HORMONE RECEPTOR INTERACTOR 12                            | 0.00095521 | 0.01818957 | 1.65  | 3.13 |
| TSPAN17  | TETRASPANIN 17                                                    | 0.00018909 | 0.00815927 | 1.35  | 2.55 |
| TSPAN33  | TETRASPANIN 33                                                    | 0.00385802 | 0.00073629 | 1.06  | 2.09 |
| TXNL4A   | THIOREDOXIN-LIKE 4A                                               | 2.4226E-05 | 0.00518424 | 1.14  | 2.20 |
| TYK2     | TYROSINE KINASE 2                                                 | 0.00232848 | 0.00389521 | 1.28  | 2.43 |
| UBAP1    | UBIQUITIN ASSOCIATED PROTEIN 1                                    | 0.00016639 | 0.00385418 | 1.12  | 2.17 |
| UBE2D4   | UBIQUITIN-CONJUGATING ENZYME E2D 4 (PUTATIVE)                     | 0.0005424  | 0.00649472 | -1.45 | 0.37 |
| UBE2Z    | UBIQUITIN-CONJUGATING ENZYME E2Z                                  | 0.00198196 | 0.02346202 | 1.44  | 2.71 |
| UBP1     | UPSTREAM BINDING PROTEIN 1 (LBP-1A)                               | 0.000342   | 0.00822753 | -1.08 | 0.47 |
| UCHL3    | UBIQUITIN CARBOXYL-TERMINAL ESTERASE L3 (UBIQUITIN THIOLESTERASE) | 0.0001731  | 0.00356378 | -1.16 | 0.45 |
| UCK2     | URIDINE-CYTIDINE KINASE 2                                         | 0.00257153 | 0.0055805  | -1.16 | 0.45 |
| UGDH     | UDP-GLUCOSE DEHYDROGENASE                                         | 0.00053737 | 0.00385961 | -2.84 | 0.14 |
| UNC119B  | UNC-119 HOMOLOG B                                                 | 0.0010136  | 0.01936187 | 1.11  | 2.16 |
| UNG      | URACIL-DNA GLYCOSYLASE                                            | 6.2517E-05 | 0.02216045 | -1.05 | 0.48 |
| UTRN     | UTROPHIN                                                          | 0.00111757 | 0.00750623 | -1.38 | 0.38 |
| VAMP8    | VESICLE-ASSOCIATED MEMBRANE PROTEIN 8                             | 0.00439437 | 0.01399381 | 1.20  | 2.29 |
| VEGFA    | VASCULAR ENDOTHELIAL GROWTH FACTOR A                              | 1.2341E-05 | 0.00449503 | -1.94 | 0.26 |
| VPS13D   | VACUOLAR PROTEIN SORTING 13 D                                     | 0.00018719 | 0.00233427 | 2.37  | 5.18 |
| WARS     | TRYPTOPHANYL-TRNA SYNTHETASE                                      | 0.00098184 | 0.00051603 | 1.59  | 3.00 |
| XAF1     | XIAP ASSOCIATED FACTOR 1                                          | 1.44E-05   | 0.00489157 | 1.99  | 3.96 |
| XDH      | XANTHINE DEHYDROGENASE                                            | 0.00243758 | 0.0055805  | 1.06  | 2.08 |
| XIST     | X-INACTIVE SPECIFIC TRANSCRIPT                                    | 9.8205E-10 | 0.00323494 | -5.47 | 0.02 |
| XPO1     | EXPORTIN 1                                                        | 2.5304E-06 | 0.03130162 | 1.62  | 3.08 |
| YPEL3    | YIPPEE-LIKE 2                                                     | 0.00017042 | 0.00153351 | 1.23  | 2.35 |
| ZDHC4    | ZINC FINGER, DHHC-TYPE CONTAINING 4                               | 0.00398015 | 0.00154486 | 1.05  | 2.06 |
| ZFYVE21  | EARLY ENDOSOME ANTIGEN 1                                          | 0.00023268 | 0.01696415 | 1.85  | 3.60 |
| ZG16B    | ZYMOGEN GRANULE PROTEIN 16 HOMOLOG B                              | 0.00268162 | 0.01558698 | -1.78 | 0.29 |
| ZNF313   | RING FINGER PROTEIN 114                                           | 0.00101319 | 0.00075523 | 1.00  | 2.01 |
| ZNF32    | ZINC FINGER PROTEIN 32                                            | 2.991E-05  | 0.00288981 | 1.08  | 2.11 |
| ZNF75D   | ZINC FINGER PROTEIN 75D                                           | 0.001186   | 0.01427228 | 1.05  | 2.07 |
| ZWINT    | ZW10 INTERACTOR                                                   | 0.00047976 | 0.0229459  | -1.32 | 0.40 |

\* The genes that were significantly modulated ( $p < 0.05$  with Benjamini-Hochberg correction for multiple testing) and showed a mean fold expression value  $> 2$  or  $< 0.5$  upon BTv infection were selected.

**Table S4. DEG in spleen cDCs upon BTV infection\***

| Official gene symbol | Approved name                                                      | Control sheep 1 (log2) | Control sheep 2 (log2) | Control sheep 3 (log2) | Infected sheep 1 (log2) | Infected sheep 2 (log2) | Minimal fold change (log2) | Minimal fold change |
|----------------------|--------------------------------------------------------------------|------------------------|------------------------|------------------------|-------------------------|-------------------------|----------------------------|---------------------|
| ADD3                 | ADDUCIN 3 (GAMMA)                                                  | 4.87                   | 3.83                   | 4.19                   | 2.04                    | 1.75                    | -1.79                      | 0.29                |
| AHNAK                | AHNAK NUCLEOPROTEIN                                                | 6.98                   | 6.59                   | 6.05                   | 4.76                    | 4.27                    | -1.29                      | 0.41                |
| ARHGAP9              | RHO GTPASE ACTIVATING PROTEIN 9                                    | 3.95                   | 3.57                   | 4.00                   | 1.25                    | 1.07                    | -2.32                      | 0.20                |
| ARSB                 | ARYLSULFATASE B                                                    | 1.58                   | 0.74                   | 1.46                   | -0.73                   | -0.53                   | -1.27                      | 0.41                |
| ASF1B                | ASF1 ANTI-SILENCING FUNCTION 1 HOMOLOG B                           | 1.34                   | 1.65                   | 1.36                   | 0.05                    | 0.23                    | -1.11                      | 0.46                |
| BAMBI                | BMP AND ACTIVIN MEMBRANE-BOUND INHIBITOR HOMOLOG                   | 1.47                   | 0.90                   | 2.32                   | -0.59                   | -0.81                   | -1.49                      | 0.35                |
| BATF3                | BASIC LEUCINE ZIPPER TRANSCRIPTION FACTOR, ATF-LIKE 3              | 5.72                   | 6.44                   | 6.27                   | 7.79                    | 7.61                    | 1.17                       | 2.25                |
| BCL2L11              | BCL2-LIKE 11 (APOPTOSIS FACILITATOR)                               | -0.33                  | -0.01                  | 0.24                   | 1.48                    | 1.73                    | 1.23                       | 2.35                |
| BLVRB                | BILIVERDIN REDUCTASE B (FLAVIN REDUCTASE (NADPH))                  | 4.12                   | 4.89                   | 4.49                   | 6.96                    | 6.64                    | 1.75                       | 3.37                |
| BMP7                 | BONE MORPHOGENETIC PROTEIN 7                                       | -1.90                  | -2.06                  | -1.82                  | -0.62                   | -0.32                   | 1.20                       | 2.30                |
| C12orf75             | CHROMOSOME 12 OPEN READING FRAME 75                                | 2.83                   | 1.45                   | 1.85                   | -0.24                   | 0.26                    | -1.20                      | 0.44                |
| C13orf15             | CHROMOSOME 13 OPEN READING FRAME 15                                | 3.57                   | 2.62                   | 3.46                   | 1.23                    | 0.19                    | -1.39                      | 0.38                |
| C6orf132             | CHROMOSOME 6 OPEN READING FRAME 132                                | 1.16                   | 0.96                   | 0.95                   | -0.50                   | -0.84                   | -1.45                      | 0.37                |
| CALD1                | CALDESMON 1                                                        | -1.15                  | -0.89                  | -0.55                  | 0.53                    | 0.84                    | 1.08                       | 2.12                |
| CASP7                | CASPASE 7, APOPTOSIS-RELATED CYSTEINE PEPTIDASE                    | 3.12                   | 3.23                   | 3.68                   | 4.87                    | 4.94                    | 1.19                       | 2.29                |
| CCL5                 | CHEMOKINE (C-C MOTIF) LIGAND 5                                     | 2.34                   | 1.59                   | 2.89                   | -0.65                   | 0.15                    | -1.44                      | 0.37                |
| CD19                 | CD19 MOLECULE                                                      | 2.34                   | 2.01                   | 2.23                   | 0.08                    | -0.19                   | -1.93                      | 0.26                |
| CD1E                 | CD1E MOLECULE                                                      | 1.97                   | 1.39                   | 1.91                   | -0.05                   | -0.06                   | -1.44                      | 0.37                |
| CD22                 | CD22 MOLECULE                                                      | 1.59                   | 1.82                   | 1.58                   | 0.08                    | 0.30                    | -1.28                      | 0.41                |
| CD247                | CD247 MOLECULE                                                     | 2.34                   | 2.25                   | 2.72                   | -0.76                   | 0.51                    | -1.73                      | 0.30                |
| CD3D                 | CD3D MOLECULE, DELTA (CD3-TCR COMPLEX)                             | 3.86                   | 2.87                   | 4.19                   | 1.62                    | 0.75                    | -1.25                      | 0.42                |
| CD3E                 | CD3E MOLECULE, EPSILON (CD3-TCR COMPLEX)                           | 6.14                   | 5.81                   | 6.94                   | 3.78                    | 2.88                    | -2.03                      | 0.24                |
| CD3G                 | CD3G MOLECULE, GAMMA (CD3-TCR COMPLEX)                             | 0.52                   | 1.01                   | 1.20                   | -0.79                   | -1.31                   | -1.31                      | 0.40                |
| CD52                 | CD52 MOLECULE                                                      | 3.04                   | 2.20                   | 2.86                   | -0.70                   | -0.13                   | -2.33                      | 0.20                |
| CD6                  | CD6 MOLECULE                                                       | 3.62                   | 3.29                   | 3.93                   | 2.22                    | 1.00                    | -1.06                      | 0.48                |
| CD69                 | CD69 MOLECULE                                                      | 2.30                   | 0.56                   | 2.37                   | -0.65                   | -1.13                   | -1.21                      | 0.43                |
| CD79A                | CD79A MOLECULE, IMMUNOGLOBULIN-ASSOCIATED ALPHA                    | 3.85                   | 3.49                   | 3.25                   | 1.57                    | 2.06                    | -1.20                      | 0.44                |
| CD9                  | CD9 MOLECULE                                                       | 2.08                   | 1.65                   | 1.76                   | -0.34                   | -0.38                   | -1.99                      | 0.25                |
| CDKN2D               | CYCLIN-DEPENDENT KINASE INHIBITOR 2D (P19, INHIBITS CDK4)          | 5.84                   | 4.42                   | 4.67                   | 3.34                    | 3.32                    | -1.09                      | 0.47                |
| CFI                  | COMPLEMENT FACTOR I                                                | -1.86                  | -1.82                  | -1.85                  | -0.70                   | 0.79                    | 1.11                       | 2.16                |
| CLNK                 | CYTOKINE-DEPENDENT HEMATOPOIETIC CELL LINKER                       | 2.04                   | 2.60                   | 3.26                   | 4.53                    | 4.36                    | 1.10                       | 2.14                |
| CSF1R                | COLONY STIMULATING FACTOR 1 RECEPTOR                               | 3.08                   | 3.30                   | 2.33                   | 0.52                    | 1.05                    | -1.28                      | 0.41                |
| CXCL10               | CHEMOKINE (C-X-C MOTIF) LIGAND 10                                  | 4.29                   | 4.84                   | 4.77                   | 7.43                    | 6.70                    | 1.85                       | 3.61                |
| CXCL2                | CHEMOKINE (C-X-C MOTIF) LIGAND 2                                   | 2.37                   | 0.36                   | 0.79                   | -0.88                   | -0.94                   | -1.24                      | 0.42                |
| DDIT4                | DNA-DAMAGE-INDUCIBLE TRANSCRIPT 4                                  | 2.56                   | 2.51                   | 2.45                   | 1.21                    | 0.59                    | -1.24                      | 0.42                |
| DNAJB6               | DNAJ (HSP40) HOMOLOG, SUBFAMILY B, MEMBER 6                        | 3.95                   | 3.53                   | 3.89                   | 5.81                    | 5.09                    | 1.14                       | 2.21                |
| DUSP1                | DUAL SPECIFICITY PHOSPHATASE 1                                     | 3.81                   | 4.16                   | 3.75                   | 0.43                    | 2.67                    | -1.07                      | 0.47                |
| DUSP5                | DUAL SPECIFICITY PHOSPHATASE 5                                     | 5.52                   | 3.14                   | 3.99                   | 1.34                    | 1.85                    | -1.29                      | 0.41                |
| DYSF                 | DYSFERLIN, LIMB GIRDLE MUSCULAR DYSTROPHY 2B (AUTOSOMAL RECESSIVE) | -1.44                  | -1.10                  | -1.43                  | 0.07                    | 0.51                    | 1.17                       | 2.25                |
| EIF2AK2              | EUKARYOTIC TRANSLATION INITIATION FACTOR 2-ALPHA KINASE 2          | -0.54                  | -0.27                  | 0.04                   | 1.77                    | 2.60                    | 1.74                       | 3.33                |

|         |                                                                                                                              |       |       |       |       |       |       |       |
|---------|------------------------------------------------------------------------------------------------------------------------------|-------|-------|-------|-------|-------|-------|-------|
| EMP3    | EPITHELIAL MEMBRANE PROTEIN 3                                                                                                | 3.88  | 4.04  | 3.19  | 1.19  | 1.44  | -1.75 | 0.30  |
| ERG     | V-ETS ERYTHROBLASTOSIS VIRUS E26 ONCOGENE                                                                                    | 1.01  | 0.92  | 1.34  | -0.82 | -1.04 | -1.74 | 0.30  |
| ESYT1   | FAMILY WITH SEQUENCE SIMILARITY 62 (C2 DOMAIN CONTAINING), MEMBER A                                                          | 1.29  | 0.77  | 1.11  | -0.26 | -0.31 | -1.02 | 0.49  |
| ETS1    | V-ETS ERYTHROBLASTOSIS VIRUS E26 ONCOGENE HOMOLOG 1 (AVIAN)                                                                  | 3.60  | 2.85  | 3.69  | 0.60  | 0.23  | -2.24 | 0.21  |
| FAM129C | FAMILY WITH SEQUENCE SIMILARITY 129, MEMBER C                                                                                | 5.96  | 4.72  | 4.13  | 3.06  | 1.62  | -1.08 | 0.47  |
| FAM149A | FAMILY WITH SEQUENCE SIMILARITY 149, MEMBER A                                                                                | 4.34  | 2.36  | 2.97  | 0.51  | 0.11  | -1.85 | 0.28  |
| FCER1A  | FC FRAGMENT OF IGE, HIGH AFFINITY I, RECEPTOR FOR; ALPHA POLYPEPTIDE                                                         | 4.03  | 2.73  | 3.57  | 0.27  | -0.16 | -2.46 | 0.18  |
| FGL2    | FIBRINOGEN-LIKE 2                                                                                                            | 3.25  | 4.03  | 4.53  | 5.62  | 5.61  | 1.08  | 2.11  |
| FLNA    | FILAMIN A, ALPHA (ACTIN BINDING PROTEIN 280)                                                                                 | 1.49  | 1.54  | 1.18  | -0.42 | -0.27 | -1.45 | 0.37  |
| FMNL2   | FORMIN-LIKE 2                                                                                                                | 1.04  | 0.61  | 1.05  | 2.68  | 2.33  | 1.28  | 2.43  |
| FOSB    | FBJ MURINE OSTEOSARCOMA VIRAL ONCOGENE HOMOLOG B                                                                             | 1.21  | 1.40  | 1.23  | -0.33 | 0.05  | -1.16 | 0.45  |
| FTSJD1  | FTSJ METHYLTRANSFERASE DOMAIN CONTAINING 1                                                                                   | 0.07  | 0.06  | 0.12  | 1.37  | 1.18  | 1.06  | 2.09  |
| GAPDH   | GLYCERALDEHYDE-3-PHOSPHATE DEHYDROGENASE-LIKE 6; HYPOTHETICAL PROTEIN LOC100133042; GLYCERALDEHYDE-3-PHOSPHATE DEHYDROGENASE | 7.97  | 8.71  | 8.11  | 4.85  | 6.19  | -1.78 | 0.29  |
| GAS1    | GROWTH ARREST-SPECIFIC 1                                                                                                     | 1.04  | 1.73  | 1.88  | 3.69  | 2.89  | 1.01  | 2.02  |
| GIMAP6  | GTPASE, IMAP FAMILY MEMBER 6                                                                                                 | 2.08  | 1.93  | 2.44  | 0.61  | 0.90  | -1.03 | 0.49  |
| GKAP1   | G KINASE ANCHORING PROTEIN 1                                                                                                 | 1.35  | 0.61  | 1.41  | 2.53  | 2.71  | 1.12  | 2.17  |
| GNB2L1  | GUANINE NUCLEOTIDE BINDING PROTEIN (G PROTEIN), BETA POLYPEPTIDE 2-LIKE 1                                                    | 9.55  | 9.58  | 9.60  | 8.07  | 8.48  | -1.08 | 0.47  |
| HERC5   | HECT DOMAIN AND RLD 5                                                                                                        | 2.07  | 1.94  | 2.33  | 4.26  | 3.78  | 1.44  | 2.72  |
| HINT2   | HISTIDINE TRIAD NUCLEOTIDE BINDING PROTEIN 2                                                                                 | 0.83  | 1.69  | 1.08  | -0.65 | -0.31 | -1.14 | 0.45  |
| HSPA4L  | HEAT SHOCK 70KDA PROTEIN 4-LIKE                                                                                              | -1.51 | -1.50 | -1.35 | -0.11 | 0.19  | 1.24  | 2.37  |
| HSPB1   | HEAT SHOCK 27KDA PROTEIN-LIKE 2 PSEUDOGENE; HEAT SHOCK 27KDA PROTEIN 1                                                       | 5.66  | 8.13  | 6.49  | 9.29  | 9.26  | 1.13  | 2.19  |
| HSPE1   | HEAT SHOCK 10KDA PROTEIN 1 (CHAPERONIN 10)                                                                                   | 7.15  | 7.18  | 7.14  | 8.72  | 8.81  | 1.54  | 2.91  |
| ID3     | INHIBITOR OF DNA BINDING 3, DOMINANT NEGATIVE HELIX-LOOP-HELIX PROTEIN                                                       | 2.97  | 2.27  | 3.12  | 1.10  | 0.92  | -1.16 | 0.45  |
| IDH3G   | ISOCITRATE DEHYDROGENASE 3 (NAD+) GAMMA                                                                                      | 3.87  | 4.29  | 3.80  | 1.22  | 2.74  | -1.05 | 0.48  |
| IDO1    | INDOLEAMINE 2,3-DIOXYGENASE 1                                                                                                | -0.72 | 0.65  | -0.14 | 1.72  | 2.77  | 1.06  | 2.09  |
| IGF2    | INSULIN-LIKE GROWTH FACTOR 2 (SOMATOMEDIN A); INSULIN; INS-IGF2 READTHROUGH TRANSCRIPT                                       | 1.15  | 0.54  | 1.77  | -0.67 | -1.68 | -1.22 | 0.43  |
| IGHG1   | IMMUNOGLOBULIN HEAVY CONSTANT GAMMA 1                                                                                        | 4.47  | 2.78  | 4.64  | 0.81  | 0.60  | -1.97 | 0.26  |
| IL18    | INTERLEUKIN 18 (INTERFERON-GAMMA-INDUCING FACTOR)                                                                            | -1.83 | -1.21 | -1.61 | 0.56  | -0.14 | 1.07  | 2.10  |
| IL1RN   | INTERLEUKIN 1 RECEPTOR ANTAGONIST                                                                                            | 1.23  | 0.72  | 0.77  | -0.29 | -0.37 | -1.01 | 0.50  |
| IL27    | INTERLEUKIN 27                                                                                                               | -0.06 | -0.11 | -0.10 | 2.80  | 1.80  | 1.87  | 3.65  |
| IL8     | INTERLEUKIN 8                                                                                                                | 3.27  | 0.60  | 1.52  | -0.49 | -1.17 | -1.09 | 0.47  |
| IRF4    | INTERFERON REGULATORY FACTOR 4                                                                                               | 1.92  | 2.46  | 1.18  | -0.07 | 0.12  | -1.06 | 0.48  |
| ISG15   | ISG15 UBIQUITIN-LIKE MODIFIER                                                                                                | 3.38  | 2.46  | 2.69  | 7.10  | 6.79  | 3.41  | 10.63 |
| ITGAD   | INTEGRIN, ALPHA D                                                                                                            | 2.31  | 2.80  | 3.22  | -0.04 | -0.40 | -2.34 | 0.20  |
| KCNE3   | POTASSIUM VOLTAGE-GATED CHANNEL, ISK-RELATED FAMILY, MEMBER 3                                                                | 1.53  | 1.15  | 0.65  | -0.35 | -0.89 | -1.01 | 0.50  |
| KIF26A  | KINESIN FAMILY MEMBER 26A                                                                                                    | -1.37 | -1.07 | -0.98 | 0.53  | 0.47  | 1.45  | 2.73  |
| KLF4    | KRUPPEL-LIKE FACTOR 4 (GUT)                                                                                                  | 8.22  | 7.10  | 7.27  | 4.80  | 4.29  | -2.30 | 0.20  |
| LAP3    | LEUCINE AMINOPEPTIDASE 3                                                                                                     | 4.33  | 4.67  | 4.38  | 6.08  | 6.10  | 1.41  | 2.65  |
| LCK     | LYMPHOCYTE-SPECIFIC PROTEIN TYROSINE KINASE                                                                                  | 2.56  | 1.86  | 2.76  | -0.43 | -0.25 | -2.11 | 0.23  |
| LIMCH1  | LIM AND CALPONIN HOMOLOGY DOMAINS 1                                                                                          | 4.15  | 4.67  | 3.69  | 1.12  | 2.31  | -1.38 | 0.38  |
| LYST    | LYSOSOMAL TRAFFICKING REGULATOR                                                                                              | 3.76  | 3.92  | 3.97  | 6.00  | 5.94  | 1.97  | 3.92  |
| MAGED4B | MELANOMA ANTIGEN FAMILY D, 4B; MELANOMA ANTIGEN FAMILY D, 4                                                                  | 1.51  | 1.43  | 1.38  | -0.07 | 0.13  | -1.26 | 0.42  |
| MAGOH   | MAGO-NASHI HOMOLOG, PROLIFERATION-ASSOCIATED (DROSOPHILA)                                                                    | 2.07  | 1.91  | 2.26  | 3.56  | 3.71  | 1.30  | 2.46  |

|          |                                                                                                                  |       |      |       |       |       |       |       |
|----------|------------------------------------------------------------------------------------------------------------------|-------|------|-------|-------|-------|-------|-------|
| MAP1LC3A | MICROTUBULE-ASSOCIATED PROTEIN 1 LIGHT CHAIN 3 ALPHA                                                             | 2.44  | 2.79 | 2.58  | 0.79  | 1.43  | -1.02 | 0.49  |
| MATN2    | MATRILIN 2                                                                                                       | 0.21  | 1.55 | 1.31  | 2.90  | 3.30  | 1.35  | 2.55  |
| MBP      | MYELIN BASIC PROTEIN                                                                                             | -0.72 | 0.08 | -0.83 | 1.72  | 1.32  | 1.23  | 2.35  |
| MED25    | MEDIATOR COMPLEX SUBUNIT 25                                                                                      | 2.58  | 1.65 | 1.53  | 0.24  | -0.05 | -1.29 | 0.41  |
| METTL8   | METHYLTRANSFERASE LIKE 8                                                                                         | 1.96  | 2.39 | 2.88  | 4.45  | 4.52  | 1.58  | 2.99  |
| MGMT     | O-6-METHYLGUANINE-DNA METHYLTRANSFERASE                                                                          | 1.00  | 1.02 | 0.76  | -0.25 | -0.70 | -1.00 | 0.50  |
| MT2A     | METALLOTHIONEIN 2A                                                                                               | 4.20  | 4.37 | 3.85  | 6.18  | 6.02  | 1.65  | 3.14  |
| MX1      | MYXOVIRUS (INFLUENZA VIRUS) RESISTANCE 1, INTERFERON-INDUCIBLE PROTEIN P78                                       | 3.28  | 2.39 | 3.06  | 5.77  | 5.33  | 2.04  | 4.13  |
| MX2      | MYXOVIRUS (INFLUENZA VIRUS) RESISTANCE 2                                                                         | 3.03  | 2.42 | 2.14  | 6.67  | 6.62  | 3.59  | 12.04 |
| MXRA7    | MATRIX-REMODELLING ASSOCIATED 7                                                                                  | 2.93  | 1.57 | 2.76  | 0.22  | 0.35  | -1.23 | 0.43  |
| N4BP2L1  | NEDD4 BINDING PROTEIN 2-LIKE 1                                                                                   | 0.51  | 0.73 | 1.03  | 2.38  | 2.09  | 1.07  | 2.09  |
| NCALD    | NEUROCALCIN DELTA                                                                                                | 2.21  | 1.47 | 2.00  | 0.20  | 0.47  | -1.00 | 0.50  |
| NOTCH3   | NOTCH HOMOLOG 3                                                                                                  | 6.51  | 4.12 | 4.98  | 1.57  | 1.10  | -2.55 | 0.17  |
| NQO2     | NAD(P)H DEHYDROGENASE, QUINONE 2                                                                                 | 2.91  | 2.86 | 2.51  | 0.43  | 1.06  | -1.44 | 0.37  |
| NR4A1    | NUCLEAR RECEPTOR SUBFAMILY 4, GROUP A, MEMBER 1                                                                  | 3.74  | 4.12 | 2.95  | 0.42  | 1.86  | -1.09 | 0.47  |
| NUDT9    | NUDIX (NUCLEOSIDE DIPHOSPHATE LINKED MOIETY X)-TYPE MOTIF 9                                                      | 0.61  | 0.88 | 0.88  | 3.48  | 2.25  | 1.37  | 2.58  |
| P4HA2    | PROLYL 4-HYDROXYLASE, ALPHA POLYPEPTIDE II                                                                       | 3.02  | 2.88 | 3.17  | 5.18  | 5.62  | 2.01  | 4.04  |
| PARP14   | POLY (ADP-RIBOSE) POLYMERASE FAMILY, MEMBER 14                                                                   | 2.77  | 2.46 | 2.36  | 4.13  | 3.98  | 1.22  | 2.32  |
| PARP9    | POLY (ADP-RIBOSE) POLYMERASE FAMILY, MEMBER 9                                                                    | 3.13  | 2.82 | 3.01  | 4.18  | 4.24  | 1.04  | 2.06  |
| PDLIM4   | PDZ AND LIM DOMAIN 4                                                                                             | 0.55  | 1.00 | 1.63  | 2.94  | 3.07  | 1.31  | 2.47  |
| PGM1     | PHOSPHOGLUCOMUTASE 1                                                                                             | 5.17  | 4.59 | 5.49  | 3.42  | 3.43  | -1.16 | 0.45  |
| PIWIL4   | PIWI-LIKE 4                                                                                                      | 0.59  | 1.52 | 0.79  | 2.59  | 2.84  | 1.07  | 2.10  |
| PLA2G16  | PHOSPHOLIPASE A2, GROUP XVI                                                                                      | 3.35  | 2.61 | 3.03  | 5.14  | 4.83  | 1.48  | 2.79  |
| PLCB2    | PHOSPHOLIPASE C, BETA 2                                                                                          | 4.23  | 4.27 | 3.95  | 2.65  | 2.94  | -1.01 | 0.50  |
| PPIC     | PEPTIDYLPROLYL ISOMERASE C (CYCLOPHILIN C)                                                                       | 0.44  | 0.79 | -0.07 | 1.83  | 3.06  | 1.03  | 2.05  |
| PPIF     | PEPTIDYLPROLYL ISOMERASE F                                                                                       | 0.79  | 1.50 | 1.13  | -0.52 | -0.28 | -1.07 | 0.48  |
| PRAM1    | PML-RARA REGULATED ADAPTOR MOLECULE 1                                                                            | 2.83  | 2.77 | 2.55  | 1.12  | 0.33  | -1.42 | 0.37  |
| PSPC1    | PARASPECKLE COMPONENT 1; PARASPECKLE PROTEIN 1 PSEUDOGENE                                                        | 2.37  | 2.09 | 2.36  | 0.08  | 0.91  | -1.17 | 0.44  |
| PTPLAD1  | PROTEIN TYROSINE PHOSPHATASE-LIKE A DOMAIN CONTAINING 1                                                          | 1.40  | 1.83 | 1.77  | 3.67  | 3.19  | 1.36  | 2.57  |
| PTPLB    | PROTEIN TYROSINE PHOSPHATASE-LIKE (PROLINE INSTEAD OF CATALYTIC ARGININE), MEMBER B                              | 1.10  | 0.75 | 1.04  | 2.26  | 2.16  | 1.06  | 2.09  |
| RAB30    | RAB30, MEMBER RAS ONCOGENE FAMILY                                                                                | 3.54  | 4.04 | 4.66  | 5.71  | 5.94  | 1.05  | 2.07  |
| RASGRP2  | RAS GUANYL RELEASING PROTEIN 2 (CALCIUM AND DAG-REGULATED)                                                       | 1.07  | 1.26 | 0.74  | -0.29 | -0.27 | -1.01 | 0.50  |
| RGL1     | RAL GUANINE NUCLEOTIDE DISSOCIATION STIMULATOR-LIKE 1                                                            | -0.05 | 0.12 | 0.39  | 1.61  | 1.88  | 1.22  | 2.33  |
| RHOB     | RAS HOMOLOG GENE FAMILY, MEMBER B                                                                                | 5.30  | 4.50 | 5.00  | 2.69  | 3.48  | -1.02 | 0.49  |
| RNASE6   | RIBONUCLEASE, RNASE A FAMILY, K6                                                                                 | 3.46  | 2.97 | 3.18  | 1.16  | 0.82  | -1.80 | 0.29  |
| RPS24    | RIBOSOMAL PROTEIN S24                                                                                            | -0.09 | 0.71 | 0.76  | 2.67  | 2.41  | 1.65  | 3.14  |
| RSRC2    | ARGININE/SERINE-RICH COILED-COIL 2                                                                               | 1.91  | 1.81 | 2.01  | 3.44  | 3.17  | 1.15  | 2.22  |
| RTP4     | RECEPTOR (CHEMOSENSORY) TRANSPORTER PROTEIN 4                                                                    | 2.36  | 1.26 | 1.98  | 5.18  | 4.47  | 2.12  | 4.33  |
| RUNX2    | RUNT-RELATED TRANSCRIPTION FACTOR 2                                                                              | 3.17  | 2.44 | 2.73  | 1.23  | 1.31  | -1.13 | 0.46  |
| SARM1    | STERILE ALPHA AND TIR MOTIF CONTAINING 1                                                                         | 3.41  | 3.37 | 2.94  | 1.51  | 1.90  | -1.05 | 0.48  |
| SCD      | STEAROYL-CoA DESATURASE (DELTA-9-DESATURASE)                                                                     | 3.03  | 2.95 | 3.21  | 1.60  | 1.88  | -1.07 | 0.48  |
| SEMA4D   | SEMA DOMAIN, IMMUNOGLOBULIN DOMAIN (IG), TRANSMEMBRANE DOMAIN (TM) AND SHORT CYTOPLASMIC DOMAIN, (SEMAPHORIN) 4D | 5.24  | 4.72 | 5.46  | 3.53  | 2.46  | -1.19 | 0.44  |
| SEPT1    | SEPTIN 1                                                                                                         | 1.44  | 0.94 | 1.01  | -0.31 | -0.07 | -1.01 | 0.50  |



|          |                                                                                                               |       |       |       |       |       |       |       |
|----------|---------------------------------------------------------------------------------------------------------------|-------|-------|-------|-------|-------|-------|-------|
| SEPT5    | SEPTIN 5                                                                                                      | 1.45  | 2.08  | 1.49  | 0.16  | -0.96 | -1.28 | 0.41  |
| SERPINH1 | SERPIN PEPTIDASE INHIBITOR, CLADE H (HEAT SHOCK PROTEIN 47), MEMBER 1, (COLLAGEN BINDING PROTEIN 1)           | -0.81 | -0.87 | -0.83 | 3.28  | 3.87  | 4.09  | 17.04 |
| SLAMF7   | SLAM FAMILY MEMBER 7                                                                                          | 4.63  | 4.84  | 5.09  | 6.70  | 6.61  | 1.53  | 2.88  |
| SLC27A5  | SOLUTE CARRIER FAMILY 27 (FATTY ACID TRANSPORTER), MEMBER 5                                                   | -1.23 | -0.75 | -1.17 | 0.31  | 0.69  | 1.07  | 2.09  |
| SMAGP    | SMALL TRANS-MEMBRANE AND GLYCOSYLATED PROTEIN                                                                 | 2.36  | 2.29  | 2.19  | 0.84  | 1.10  | -1.09 | 0.47  |
| SOCS3    | SUPPRESSOR OF CYTOKINE SIGNALING 3                                                                            | 0.41  | -0.42 | 0.02  | 2.81  | 2.11  | 1.71  | 3.26  |
| SPEG     | SPEG COMPLEX LOCUS                                                                                            | 1.81  | 1.93  | 1.00  | 6.54  | 6.01  | 4.08  | 16.94 |
| SPINT2   | SERINE PEPTIDASE INHIBITOR, KUNITZ TYPE, 2                                                                    | 3.57  | 2.48  | 2.56  | 0.25  | 1.40  | -1.07 | 0.48  |
| SPTBN2   | SPECTRIN, BETA, NON-ERYTHROCYTIC 2                                                                            | 2.69  | 2.27  | 2.25  | 0.28  | 0.44  | -1.80 | 0.29  |
| SSR4     | SIGNAL SEQUENCE RECEPTOR, DELTA (TRANSLOCON-ASSOCIATED PROTEIN DELTA)                                         | 6.18  | 5.69  | 5.65  | 2.72  | 4.62  | -1.03 | 0.49  |
| ST6      | SIALYLTRANSFERASE 6                                                                                           | 5.62  | 4.66  | 4.63  | 0.93  | 3.27  | -1.36 | 0.39  |
| STAB1    | STABILIN 1                                                                                                    | 2.39  | 3.05  | 2.88  | 5.13  | 5.07  | 2.02  | 4.05  |
| SYTL2    | SYNAPTOTAGMIN-LIKE 2                                                                                          | 0.35  | 0.35  | 0.58  | -0.70 | -1.12 | -1.05 | 0.48  |
| TARP     | TCR GAMMA ALTERNATE READING FRAME PROTEIN; T CELL RECEPTOR GAMMA VARIABLE 9; T CELL RECEPTOR GAMMA CONSTANT 1 | 0.95  | 0.69  | 1.44  | -0.35 | -0.54 | -1.04 | 0.49  |
| TCF4     | TRANSCRIPTION FACTOR 4                                                                                        | 2.78  | 1.79  | 1.81  | -0.08 | 0.37  | -1.42 | 0.37  |
| TCF7     | TRANSCRIPTION FACTOR 7 (T-CELL SPECIFIC, HMG-BOX)                                                             | 2.34  | 1.36  | 2.40  | 0.24  | 0.24  | -1.12 | 0.46  |
| TECR     | GLYCOPROTEIN, SYNAPTIC 2                                                                                      | 3.07  | 3.23  | 2.93  | 1.15  | 1.83  | -1.10 | 0.47  |
| TESC     | TESCALCIN                                                                                                     | 2.67  | 1.52  | 2.44  | -0.19 | -0.45 | -1.70 | 0.31  |
| TFCP2    | TRANSCRIPTION FACTOR CP2                                                                                      | 3.03  | 2.52  | 3.06  | 4.46  | 4.17  | 1.11  | 2.16  |
| TIE1     | TYROSINE KINASE WITH IMMUNOGLOBULIN-LIKE AND EGF-LIKE DOMAINS 1                                               | 3.27  | 1.96  | 2.26  | -0.42 | 0.46  | -1.50 | 0.35  |
| TM9SF2   | TRANSMEMBRANE 9 SUPERFAMILY MEMBER 2                                                                          | -1.83 | -1.87 | -2.12 | 2.38  | 2.20  | 4.03  | 16.29 |
| TMEM154  | TRANSMEMBRANE PROTEIN 154                                                                                     | 2.36  | 1.13  | 1.44  | -0.09 | -0.19 | -1.22 | 0.43  |
| TPI1     | TPI1 PSEUDOGENE; TRIOSEPHOSPHATE ISOMERASE 1                                                                  | 5.16  | 4.92  | 4.94  | 2.86  | 3.77  | -1.15 | 0.45  |
| TRAC     | T CELL RECEPTOR ALPHA CONSTANT;                                                                               | 1.34  | 1.92  | 1.95  | 0.13  | -0.76 | -1.20 | 0.43  |
| TRANK1   | LUPUS BRAIN ANTIGEN 1                                                                                         | -1.04 | -0.65 | -0.68 | 0.39  | 0.96  | 1.04  | 2.06  |
| TRD@     | T CELL RECEPTOR DELTA LOCUS                                                                                   | 0.64  | 0.84  | 1.09  | -0.48 | -0.94 | -1.12 | 0.46  |
| TRIO     | TRIPLE FUNCTIONAL DOMAIN (PTPRF INTERACTING)                                                                  | 3.33  | 3.67  | 3.88  | 5.79  | 5.27  | 1.38  | 2.61  |
| TRIP6    | THYROID HORMONE RECEPTOR INTERACTOR 6                                                                         | -0.71 | -0.35 | -0.44 | 0.93  | 0.73  | 1.09  | 2.13  |
| TRPS1    | TRICHORHINOPHALANGEAL SYNDROME I                                                                              | 1.13  | 0.93  | 1.43  | -0.16 | -0.33 | -1.09 | 0.47  |
| UNG      | URACIL-DNA GLYCOSYLASE                                                                                        | 2.29  | 1.89  | 2.63  | 0.57  | 0.87  | -1.03 | 0.49  |
| VIM      | VIMENTIN                                                                                                      | 7.85  | 7.63  | 7.76  | 6.38  | 6.00  | -1.25 | 0.42  |
| VMP1     | VACUOLE MEMBRANE PROTEIN 1                                                                                    | 0.11  | 0.00  | 0.15  | 1.40  | 1.42  | 1.25  | 2.37  |
| VPS13D   | VACUOLAR PROTEIN SORTING 13 HOMOLOG D                                                                         | 3.59  | 2.96  | 3.16  | 5.80  | 5.28  | 1.69  | 3.22  |
| WNT2B    | WINGLESS-TYPE MMTV INTEGRATION SITE FAMILY, MEMBER 2B                                                         | 4.39  | 4.15  | 3.81  | 2.44  | 2.79  | -1.03 | 0.49  |
| XDH      | XANTHINE DEHYDROGENASE                                                                                        | -1.21 | -0.25 | -0.60 | 2.63  | 1.76  | 2.02  | 4.05  |
| XIST     | X (INACTIVE)-SPECIFIC TRANSCRIPT                                                                              | 5.15  | 5.19  | 4.93  | -0.79 | -1.59 | -5.72 | 0.02  |
| XPO1     | EXPORTIN 1                                                                                                    | 1.57  | 1.44  | 1.84  | 3.18  | 2.91  | 1.07  | 2.10  |
| ZBTB16   | ZINC FINGER AND BTB DOMAIN CONTAINING 16                                                                      | 1.24  | 1.34  | 0.79  | -0.65 | -0.48 | -1.27 | 0.42  |
| ZCCHC24  | ZINC FINGER, CCHC DOMAIN CONTAINING 24                                                                        | 2.46  | 2.04  | 1.93  | 0.05  | -0.25 | -1.87 | 0.27  |
| ZNF1     | ZINC FINGER, NFX1-TYPE CONTAINING 1                                                                           | -1.03 | -0.84 | -0.89 | 0.38  | 0.59  | 1.22  | 2.33  |

\* The genes presenting a minimum fold change >2 and <0.5 in the 2 infected samples relatively to the 3 control samples were considered as DEG.

**Table S5. Fold changes of gene expression upon BTV infection obtained in microarray and in qPCR analyses**

| Gene                  | Microarrays<br>Fold Change | qPCR<br>Fold Change |
|-----------------------|----------------------------|---------------------|
| <b>Blood pDC</b>      |                            |                     |
| CCR7                  | 2.93 <sup>1</sup>          | 26.17 <sup>3</sup>  |
| CXCL10                | 4.76 <sup>1</sup>          | 16.11 <sup>3</sup>  |
| EIF2AK2               | 2.95 <sup>1</sup>          | 7.78 <sup>3</sup>   |
| IFNG                  | 2.02 <sup>1</sup>          | 35.75 <sup>3</sup>  |
| IL8                   | 3.86 <sup>1</sup>          | 19.97 <sup>3</sup>  |
| TNF                   | 2.11 <sup>1</sup>          | 40.22 <sup>3</sup>  |
| <b>Lymph node pDC</b> |                            |                     |
| CCL5                  | 4.44 <sup>2</sup>          | 6.3 <sup>3</sup>    |
| CCR7                  | 0.38 <sup>2</sup>          | 0.44 <sup>3</sup>   |
| EIF2AK2               | 2.91 <sup>2</sup>          | 3.75 <sup>3</sup>   |
| Id2                   | 0.23 <sup>2</sup>          | 0.50 <sup>3</sup>   |
| STK17                 | 0.31 <sup>2</sup>          | 0.52 <sup>3</sup>   |
| <b>Lymph node cDC</b> |                            |                     |
| CXCL10                | 2.4 <sup>2</sup>           | 7.11 <sup>3</sup>   |
| EIF2AK2               | 3.26 <sup>2</sup>          | 19.69 <sup>3</sup>  |
| IDO1                  | 3.88 <sup>2</sup>          | 6.77 <sup>3</sup>   |
| IL1b                  | 0.19 <sup>2</sup>          | 0.13 <sup>3</sup>   |
| IL8                   | 0.13 <sup>2</sup>          | 0.64 <sup>3</sup>   |
| IRF8                  | 0.22 <sup>2</sup>          | 0.27 <sup>3</sup>   |
| <b>Spleen cDC</b>     |                            |                     |
| BATF3                 | 2.9 <sup>1</sup>           | 7.6 <sup>3</sup>    |
| CCL5                  | 0.2 <sup>1</sup>           | 0.08 <sup>3</sup>   |
| CLEC9A                | 3 <sup>1</sup>             | 13.6 <sup>3</sup>   |
| CXCL10                | 5.4 <sup>1</sup>           | 24.25 <sup>3</sup>  |
| GATA3                 | 0.3 <sup>1</sup>           | 0.41 <sup>3</sup>   |

<sup>1</sup> minimal fold change

<sup>2</sup> mean fold change

<sup>3</sup> fold between expression in one of the infected versus one of the control sheep DC

**Table S6. Canonical pathways enriched in blood pDCs, node pDCs, node cDCs and spleen cDCs upon BTV infection.**

| Ingenuity Canonical Pathways                                                 | -log (p-value) | Ratio    | Molecules                                                                                                                       |
|------------------------------------------------------------------------------|----------------|----------|---------------------------------------------------------------------------------------------------------------------------------|
| <b>Blood pDCs</b>                                                            |                |          |                                                                                                                                 |
| <b>Inflammation</b>                                                          |                |          |                                                                                                                                 |
| Role of Hypercytokinemia/hyperchemokineemia in the Pathogenesis of Influenza | 4.76E00        | 1.36E-01 | CXCL10, IL8, IFNG, CCL4, CCL2, TNF                                                                                              |
| Acute Phase Response Signaling                                               | 2.26E00        | 3.93E-02 | SOCS3, <u>RRAS2</u> , NFKBIA, SOCS2, CFB, SERPINA1, TNF                                                                         |
| IL-6 Signaling                                                               | 4.03E+00       | 7.26E-02 | IL8, SOCS3, <u>RRAS2</u> , NFKBIA, TNFRSF1A, NFKBIE, CD14, TNF, HSPB1                                                           |
| <b>Immune response</b>                                                       |                |          |                                                                                                                                 |
| Dendritic Cell Maturation                                                    | 2.76E00        | 3.86E-02 | NFKBIA, NFKBIE, HLA-DRB1, CD83, <u>IGHG1</u> , STAT4, TNF, CCR7, <u>PLCB2</u>                                                   |
| Antigen Presentation Pathway                                                 | 1.11E00        | 5.00E-02 | IFNG, HLA-DRB1                                                                                                                  |
| Communication between Innate and Adaptive Immune Cells                       | 1.24E01        | 1.38E-01 | IFNG, IL8, CD4, HLA-DRB1, CD83, <u>IGHG1</u> , CCL3, CD8B, TNFRSF17, CXCL10, TLR10, CCL4, CCL15, TNFRSF13B, TNF, TNFSF13B, CCR7 |
| Crosstalk between Dendritic Cells and Natural Killer Cells                   | 2.26E00        | 5.26E-02 | IFNG, HLA-DRB1, CD83, TNF, CCR7                                                                                                 |
| IL-12 Signaling and Production in Macrophages                                | 2.74E00        | 4.49E-02 | <u>PPARG</u> , IFNG, LYZ, <u>IL12RB1</u> , SERPINA1, S100A8, STAT4, TNF                                                         |
| <b>Signalling pathways</b>                                                   |                |          |                                                                                                                                 |
| Role of PKR in Interferon Induction and Antiviral Response                   | 3.86E00        | 1.09E-01 | IFNG, <u>TRAF3</u> , NFKBIA, EIF2AK2, TNF                                                                                       |
| NF-κB Signaling                                                              | 4.3E00         | 5.71E-02 | <u>TLR10</u> , TRAF3, <u>RRAS2</u> , NFKBIA, TNFAIP3, EIF2AK2, TNF, TNFSF13B, TNFRSF17, FGFR1                                   |
| LXR/RXR Activation                                                           | 2.97E00        | 5.15E-02 | LYZ, MYLIP, CD14, SERPINA1, S100A8, TNF, CCL2                                                                                   |
| JAK/Stat Signaling                                                           | 2.82E00        | 7.14E-02 | SOCS3, <u>RRAS2</u> , CISH, SOCS2, STAT4                                                                                        |
| Glucocorticoid Receptor Signaling                                            | 2.68E00        | 3.4E-02  | IL8, IFNG, <u>NFAT5</u> , <u>RRAS2</u> , NFKBIA, CCL2, <u>HSPA1A/HSPA1B</u> , CDKN1C, <u>GTF2A1</u> , TNF                       |
| VDR/RXR Activation                                                           | 1.76E00        | 4.94E-02 | CXCL10, IFNG, CD14, <u>KLF4</u>                                                                                                 |
| Phospholipase C Signaling                                                    | 1.97E00        | 3.08E-02 | <u>ITGB1</u> , BTK, <u>PLCB2</u> , <u>NFAT5</u> , <u>RRAS2</u> , AHNAK, MEF2C, RHOH                                             |
| P53 signaling                                                                | 4.86E-01       | 2.08E-02 | GADD45B, THBS1                                                                                                                  |
| p38 MAPK Signaling                                                           | 1.22E00        | 3.42E-02 | <u>CDC25B</u> , <u>MEF2C</u> , TNF, HSPB1                                                                                       |
| PPAR Signaling                                                               | 9.4E-01        | 2.86E-02 | <u>RRAS2</u> , NFKBIA, TNF                                                                                                      |

| Lymph node pDCs                                                                  |          |          |                                                                                                                                                                                                                                                   |
|----------------------------------------------------------------------------------|----------|----------|---------------------------------------------------------------------------------------------------------------------------------------------------------------------------------------------------------------------------------------------------|
| Inflammation                                                                     |          |          |                                                                                                                                                                                                                                                   |
| Role of Hypercytokinemia/hyperchemokine-<br>mia in the Pathogenesis of Influenza | 3.77E-01 | 4.55E-02 | <u>CCL4</u> , <u>CCL5</u>                                                                                                                                                                                                                         |
| Acute Phase Response Signaling                                                   | 2.89E-01 | 3.37E-02 | <u>SOCS3</u> , <u>FOS</u> , <u>PIK3R1</u> , <u>SOCS2</u> , <u>SERPINE1</u> , <u>HNRNP</u><br><u>K</u>                                                                                                                                             |
| IL-6 Signaling                                                                   | 2.53E-01 | 3.23E-02 | <u>SOCS3</u> , <u>FOS</u> , <u>PIK3R1</u> , <u>HSPB1</u>                                                                                                                                                                                          |
| Immune response                                                                  |          |          |                                                                                                                                                                                                                                                   |
| Dendritic Cell Maturation                                                        | 1.47E00  | 5.31E-02 | <u>STAT4</u> , <u>PLCB2</u> , <u>CD40</u> , <u>HLA-C</u> , <u>PIK3R1</u> , <u>IL32</u> , <u>HLA-B</u> , <u>HLA-DRB1</u> , <u>CD83</u> , <u>FCGR2B</u> ,<br><u>CCR7</u>                                                                            |
| Antigen Presentation Pathway                                                     | 2.94E00  | 1.5E-01  | <u>CIITA</u> , <u>HLA-B</u> , <u>NLRC5</u> , <u>HLA-DRB1</u> , <u>PSMB8</u> , <u>HLA-C</u>                                                                                                                                                        |
| Communication between Innate and Adaptive<br>Immune Cells                        | 3.03E00  | 9.17E-02 | <u>CCL4</u> , <u>CD40</u> , <u>TLR7</u> , <u>HLA-B</u> , <u>HLA-DRB1</u> , <u>CD83</u> , <u>CCL5</u> , <u>TNFRSF13B</u> , <u>CCR7</u> , <u>HLA-C</u>                                                                                              |
| Crosstalk between Dendritic Cells and Natural<br>Killer Cells                    | 2.03E00  | 8.42E-02 | <u>IL2RG</u> , <u>CD40</u> , <u>TLR7</u> , <u>HLA-B</u> , <u>HLA-DRB1</u> , <u>CD83</u> , <u>CCR7</u> , <u>HLA-C</u>                                                                                                                              |
| IL-12 Signaling and Production in Macrophages                                    | 0.5      | 3.85E-02 | <u>STAT4</u> , <u>FOS</u> , <u>CD40</u> , <u>PIK3R1</u> , <u>RAB7A</u> , <u>PCYOX1</u>                                                                                                                                                            |
| Signalling pathways                                                              |          |          |                                                                                                                                                                                                                                                   |
| Role of PKR in Interferon Induction and Antiviral<br>Response                    | 4.02E-01 | 4.35E-02 | <u>TP53</u> , <u>EIF2AK2</u>                                                                                                                                                                                                                      |
| NF-κB Signaling                                                                  | 6.82E-01 | 4.57E-02 | <u>AZI2</u> , <u>CD40</u> , <u>PIK3R1</u> , <u>BMP2</u> , <u>KDR</u> , <u>TLR7</u> , <u>TNFAIP3</u> , <u>EIF2AK2</u>                                                                                                                              |
| LXR/RXR Activation                                                               | 5.9E-01  | 4.41E-02 | <u>MYLIP</u> , <u>ARG2</u> , <u>PCYOX1</u> , <u>PTGS2</u> , <u>HMGCR</u> , <u>CYP51A1</u>                                                                                                                                                         |
| JAK/Stat Signaling                                                               | 2.73E00  | 1.14E-01 | <u>SOCS3</u> , <u>PIK3R1</u> , <u>PIAS1</u> , <u>CDKN1A</u> , <u>CISH</u> , <u>SOCS2</u> , <u>STAT4</u> , <u>FOS</u>                                                                                                                              |
| Glucocorticoid Receptor Signaling                                                | 1.75E00  | 5.44E-02 | <u>MED1</u> , <u>PIK3R1</u> , <u>HSPA9</u> , <u>SLPI</u> , <u>TAF7</u> , <u>CCL5</u> , <u>HSPA5</u> , <u>NCOA3</u> , <u>FOS</u> , <u>HSP90AB1</u> ,<br><u>NCOA2</u> , <u>CDKN1A</u> , <u>FKBP4</u> , <u>PTGS2</u> , <u>SERPINE1</u> , <u>TAF2</u> |
| VDR/RXR Activation                                                               | 4.16E00  | 1.36E-01 | <u>SERPINE1</u> , <u>SPP1</u> , <u>NCOA2</u> , <u>GADD45A</u> , <u>MED1</u> , <u>RUNX2</u> , <u>CDKN1A</u> , <u>CCL5</u> , <u>KLF4</u> ,<br><u>PSMC5</u> , <u>NCOA3</u>                                                                           |
| Phospholipase C Signaling                                                        | 4.09E-01 | 3.46E-02 | <u>TGM2</u> , <u>BTK</u> , <u>PLCB2</u> , <u>MPRIP</u> , <u>MYL6</u> , <u>RHOT2</u> , <u>ITGA5</u> , <u>FCGR2B</u> , <u>RHOF</u>                                                                                                                  |
| p53 Signaling                                                                    | 3.51E00  | 1.15E-01 | <u>TP53</u> , <u>RB1</u> , <u>PLAGL1</u> , <u>GADD45B</u> , <u>GADD45A</u> , <u>MED1</u> , <u>PIK3R1</u> , <u>CDKN1A</u> , <u>GNL3</u> ,<br><u>CCND1</u> , <u>BIRC5</u>                                                                           |
| p38 MAPK Signaling                                                               | 7.42E-01 | 5.13E-02 | <u>TP53</u> , <u>MYC</u> , <u>RPS6KA6</u> , <u>TIFA</u> , <u>MKNK2</u> , <u>HSPB1</u>                                                                                                                                                             |
| PPAR Signaling                                                                   | 4.02E-0  | 3.81E-02 | <u>FOS</u> , <u>HSP90AB1</u> , <u>MED1</u> , <u>PTGS2</u>                                                                                                                                                                                         |

| Lymph nodes cDCs                                                                 |          |          |                                                                                                                                                                                              |
|----------------------------------------------------------------------------------|----------|----------|----------------------------------------------------------------------------------------------------------------------------------------------------------------------------------------------|
| <b>Inflammation</b>                                                              |          |          |                                                                                                                                                                                              |
| Role of Hypercytokinemia/hyperchemokine-<br>mia in the Pathogenesis of Influenza | 9.56E-01 | 6.82E-02 | CXCL10, <u>IL8</u> , <u>IL1B</u>                                                                                                                                                             |
| Acute Phase Response Signaling                                                   | 7.36E-01 | 3.93E-02 | MAPK14, RIPK1, MYD88, <u>IL1B</u> , <u>SERPINE1</u> , <u>MAP2K1</u> , MAPK11                                                                                                                 |
| IL-6 Signaling                                                                   | 1.37E00  | 5.65E-02 | <u>VEGFA</u> , <u>IL8</u> , MAPK14, <u>IL1B</u> , <u>MAP2K1</u> , MAPK11, HSPB1                                                                                                              |
| <b>Immune response</b>                                                           |          |          |                                                                                                                                                                                              |
| Dendritic cell maturation                                                        | 1.64E00  | 4.83E-02 | MAPK14, HLA-A, MYD88, <u>IL1B</u> , STAT2, <u>IRF8</u> , FCGR2B, <u>STAT4</u> , MAPK11, <u>PLCB2</u>                                                                                         |
| Antigen Presentation Pathway                                                     | 1.11E00  | 7.50E-02 | <u>PSMB9</u> , HLA-A, NLRC5                                                                                                                                                                  |
| Communication between Innate and Adaptive<br>Immune Cells                        | 6.19E-01 | 3.67E-02 | CXCL10, <u>IL8</u> , HLA-A, <u>IL1B</u>                                                                                                                                                      |
| Crosstalk between Dendritic Cells and Natural<br>Killer Cells                    | 3.67E-01 | 3.16E-02 | IL2RG, HLA-A, FAS                                                                                                                                                                            |
| IL-12 Signaling and Production in Macrophages                                    | 1.12E00  | 4.49E-02 | PPARG, <u>STAT4</u> , MAPK14, MYD88, <u>IRF8</u> , <u>MAP2K1</u> , MAPK11                                                                                                                    |
| <b>Signaling pathways</b>                                                        |          |          |                                                                                                                                                                                              |
| Role of PKR in Interferon Induction and Antiviral<br>Response                    | 1.00E+00 | 6.52E-02 | MAPK14, TRAF5, EIF2AK2                                                                                                                                                                       |
| NF-κB Signaling                                                                  | 4.95E-01 | 3.43E-02 | RIPK1, MYD88, HDAC1, <u>IL1B</u> , TRAF5, EIF2AK2                                                                                                                                            |
| LXR/RXR Activation                                                               | 6.08E-01 | 3.68E-02 | LCAT, <u>IL1B</u> , <u>ARG2</u> , <u>PTGS2</u> , <u>CYP51A1</u>                                                                                                                              |
| JAK/Stat Signaling                                                               | 1.97E00  | 8.57E-02 | <u>STAT4</u> , PIAS3, PIAS1, TYK2, STAT2, <u>MAP2K1</u>                                                                                                                                      |
| Glucocorticoid Receptor Signaling                                                | 4.45E00  | 6.46E-02 | <u>IL8</u> , <u>CD3E</u> , CDK7, HSPA6, GTF2H2, MAPK11, PRKAG1, MAPK14, HSP90AB1, FKBP4, PTGES3, <u>IL1B</u> , POLR2H, <u>PTGS2</u> , <u>SERPINE1</u> , STAT4, FKBP5, <u>MAP2K1</u> , PPP3CA |
| VDR/RXR Activation                                                               | 4.33E-01 | 3.70E-02 | CXCL10, <u>SERPINB1</u> , KLF4                                                                                                                                                               |
| Phospholipase C Signaling                                                        | 7.64E-01 | 3.46E-02 | <u>TGM2</u> , <u>PLCB2</u> , GNAS, <u>CD3E</u> , HDAC1, PLA2G2A, FCGR2B, <u>MAP2K1</u> , PPP3CA                                                                                              |
| p53 Signaling                                                                    | 5.87E-01 | 4.17E-02 | MAPK14, HDAC1, CSNK1D, FAS                                                                                                                                                                   |
| p38 MAPK Signaling                                                               | 1.89E00  | 6.84E-02 | <u>MYC</u> , MAPK14, HMG1, <u>IL1B</u> , PLA2G2A, MAPK11, FAS, HSPB1                                                                                                                         |
| PPAR Signaling                                                                   | 1.8E00   | 6.67E-02 | PPARG, HSP90AB1, <u>IL1B</u> , <u>PTGS2</u> , <u>MAP2K1</u> , <u>CITED2</u> , SCAND1                                                                                                         |

| Spleen cDCs                                                                      |          |          |                                                                                                                                                             |
|----------------------------------------------------------------------------------|----------|----------|-------------------------------------------------------------------------------------------------------------------------------------------------------------|
| <b>Inflammation</b>                                                              |          |          |                                                                                                                                                             |
| Role of Hypercytokinemia/hyperchemokine-<br>mia in the Pathogenesis of Influenza | 4.41E00  | 1.14E-01 | CXCL10, <u>IL8</u> , IL18, <u>IL1RN</u> , <u>CCL5</u>                                                                                                       |
| Acute Phase Response Signaling                                                   | 1.22E00  | 2.25E-02 | SOCS3, IL18, <u>TCF4</u> , <u>IL1RN</u>                                                                                                                     |
| IL-6 Signaling                                                                   | 2.46E00  | 4.03E-02 | <u>IL8</u> , SOCS3, IL18, <u>IL1RN</u> , HSPB1                                                                                                              |
| <b>Immune response</b>                                                           |          |          |                                                                                                                                                             |
| Communication between Innate and Adaptive<br>Immune Cells                        | 4.83E00  | 6.42E-02 | CXCL10, <u>IL8</u> , IL18, <u>TRD</u> , <u>IL1RN</u> , <u>IGHG1</u> , <u>CCL5</u>                                                                           |
| Dendritic Cell Maturation                                                        | 1.72     | 2.42E-02 | <u>PLCB2</u> , IL18, <u>TRD</u> , <u>IL1RN</u> , <u>IGHG1</u>                                                                                               |
| Crosstalk between Dendritic Cells and Natural<br>Killer Cells                    | 7.32E-01 | 2.11E-02 | IL18, <u>CD69</u>                                                                                                                                           |
| IL-12 Signaling and Production in Macrophages                                    | -        |          |                                                                                                                                                             |
| <b>Signaling pathways</b>                                                        |          |          |                                                                                                                                                             |
| Role of PKR in Interferon Induction and Antiviral<br>Response                    | 5.29E-01 | 2.17E-02 | EIF2AK2                                                                                                                                                     |
| NF-κB Signaling                                                                  | 1.81E00  | 2.86E-02 | <u>LCK</u> , IL18, <u>TRD</u> , <u>IL1RN</u> , <u>EIF2AK2</u>                                                                                               |
| LXR/RXR Activation                                                               | 1.01E00  | 2.21E-02 | <u>SCD</u> , IL18, <u>IL1RN</u>                                                                                                                             |
| JAK/Stat Signaling                                                               | 3.52E-01 | 1.43E-02 | SOCS3                                                                                                                                                       |
| Glucocorticoid Receptor Signaling                                                | 2.62E00  | 2.72E-02 | <u>CD247</u> , <u>IL8</u> , CD3G, <u>CD3E</u> , <u>DUSP1</u> , <u>IL1RN</u> , <u>CCL5</u> , <u>CD3D</u>                                                     |
| VDR/RXR Activation                                                               | 2.3E00   | 4.94E-02 | CXCL10, <u>RUNX2</u> , <u>CCL5</u> , <u>KLF4</u>                                                                                                            |
| Phospholipase C Signaling                                                        | 5.09E00  | 6.54E-02 | <u>CD247</u> , <u>PLCB2</u> , <u>TRD</u> , <u>CD3E</u> , <u>GNB2L1</u> , <u>CD3D</u> , <u>CD79A</u> , <u>CD3G</u> , <u>LCK</u> , <u>AHNAK</u> , <u>RHOB</u> |
| p53 Signaling                                                                    | -        |          |                                                                                                                                                             |
| p38 MAPK Signaling                                                               | 1.71E00  | 3.42E-02 | IL18, <u>DUSP1</u> , <u>IL1RN</u> , HSPB1                                                                                                                   |
| PPAR Signaling                                                                   | 7.03E-01 | 1.90E-02 | IL18, <u>IL1RN</u>                                                                                                                                          |

**Table S7. Biological functions modulated in blood pDCs upon BTV infection**

| Functions                              | p-Value  | Z-score | Genes <sup>1</sup>                                                                                                                                                                                                                                                                                                                                                                                                                                            | #  |
|----------------------------------------|----------|---------|---------------------------------------------------------------------------------------------------------------------------------------------------------------------------------------------------------------------------------------------------------------------------------------------------------------------------------------------------------------------------------------------------------------------------------------------------------------|----|
| <b>Blood pDCs</b>                      |          |         |                                                                                                                                                                                                                                                                                                                                                                                                                                                               |    |
| Inflammatory response                  | 1.57E-16 | 2.224   | AIF1, ALOX5AP, APP, ATF3, C5AR1, CCL2, CCL4, CCR7, CD14, CD4, CDC42, CSF2RA, CXCL10, CXCR7, HYAL2, IFNG, IGHE, IL12RB1, IL8, ISG15, KLF4, LGALS1, LIPA, LTF, LYZ, NAD+, NFIL3, <u>NT5E</u> , NUPR1, PIGR, PTX3, <u>RAB27A</u> , RGS1, S100A4, S100A8, S100A9, <u>SELPLG</u> , SERPINA1, SLC11A1, SOCS3, STAT4, THBS1, <u>TLR10</u> , TNF, TNFAIP3                                                                                                             | 45 |
| Permeability of vasculature            | 1.14E-05 | 2.200   | CCL4, IFNG, LRP1, PTX3, THBS1, TNF                                                                                                                                                                                                                                                                                                                                                                                                                            | 6  |
| Chemotaxis of leucocytes               | 4.32E-11 | 2.418   | AIF1, APP, C5AR1, CCL2, CCL4, CCR7, CD4, CDC42, CSF2RA, CXCL10, CXCR7, IFNG, IL12RB1, IL8, LGALS1, PIGR, RGS1, S100A4, S100A8, S100A9, <u>SELPLG</u> , SERPINA1, SOCS3, THBS1, TNF                                                                                                                                                                                                                                                                            | 25 |
| Immune response of cells               | 5.27E-07 | 2.064   | APP, CD14, CD4, CDC42, CTLA4, CXCL10, IFNG, IGHG1, <u>ITGB1</u> , LTF, PTX3, <u>RRAS2</u> , <u>SELPLG</u> , SLC11A1, THBS1, TNF, <u>TNFRSF17</u> , UBE2L6                                                                                                                                                                                                                                                                                                     | 18 |
| Activation of antigen presenting cells | 2.13E-09 | 3.241   | APP, ATF3, <u>BTK</u> , CCL2, CCL4, CD4, CXCL10, IFNG, IL8, KLF4, LRP1, LTF, NFIL3, S100A9, SLC11A1, STAT4, THBS1, TNF                                                                                                                                                                                                                                                                                                                                        | 18 |
| Cell survival                          | 4.32E-13 | 1,189   | ANG, APP, BHLHE40, BTK, CCL2, CCL4, CD4, CDH1, CDKN1C, CEBPD, CISH, CSF2RA, CTSB, CXCL10, CXCR7, <u>DCK</u> , DUSP5, EGN3, EMILIN2, FGFR1, GADD45B, GCLC, GZMB, HSPA1A/HSPA1B, HSPB1, IFNG, IL8, INPP1, <u>ITGB1</u> , LRP1, LTF, MBD4, MEF2C, MX1, NAD+, NDRG1, <u>NFAT5</u> , NFIL3, NFKBIA, NUPR1, PLAC8, PPM1B, S100A4, <u>SMAD6</u> , SOCS2, SOCS3, STAT4, THBS1, TNF, TNFAIP3, <u>TNFRSF13B</u> , <u>TNFRSF17</u> , TNFSF13B, <u>TRAF3</u> , <u>VCL</u> | 55 |
| Killing of cells                       | 3.08E-08 | 2.011   | APP, CTLA4, CXCL10, GZMB, HSPA1A/HSPA1B, IFNG, IGHG1, <u>ITGB1</u> , LGALS1, LTF, <u>NFAT5</u> , NFKBIA, <u>NUP43</u> , TNF, TNFSF13B                                                                                                                                                                                                                                                                                                                         | 15 |
| Phagocytosis                           | 3.44E-06 | 2,074   | APP, CD14, CD4, CDC42, CXCL10, FCER2, IFNG, IGHG1, <u>ITGB1</u> , PTX3, <u>RRAS2</u> , <u>SELPLG</u> , SLC11A1, THBS1, TNF                                                                                                                                                                                                                                                                                                                                    | 15 |
| Inhibition of virus                    | 4.88E-07 | 2.581   | CCL4, EIF2AK2, IFNG, LYZ, MX1, RNASE4, TNF                                                                                                                                                                                                                                                                                                                                                                                                                    | 7  |
| <b>Lymph node pDCs</b>                 |          |         |                                                                                                                                                                                                                                                                                                                                                                                                                                                               |    |
| Inflammatory response                  | 4.22E-06 | -1.778  | ABCF1, ADAM8, B4GALT1, CCL4, CCL5, <u>CCND1</u> , CCR7, CD40, CD97, CDKN1A, CIITA, <u>CXCR4</u> , <u>CXCR7</u> , CYBB, FCGR2B, FOS, GADD45A, <u>GSN</u> , HSPD1, HYAL1, HYAL2, IER3, IL16, <u>KDR</u> , KLF4, LGALS1, LIPA, LYST, MIF, MPP1, NAD+, NCF1, <u>NEDD9</u> , NFIL3, NUP85, <u>PDE4B</u> , PRNP, PTGER4, PTGS2, PTPN2, RGS1, SERPINB1, SERPINE1, <u>SLPI</u> , SOCS3, SPP1, STAT4, <u>TAC1</u> , TGM2, TIAM1, TLR7, TNFAIP3, TP53, XBP1, ZP3        | 55 |
| Chemotaxis of leukocytes               | 2.63E-04 | -2.597  | B4GALT1, CCL4, CCL5, <u>CCND1</u> , CCR7, CD40, CDKN1A, <u>CXCR4</u> , <u>CXCR7</u> , <u>GSN</u> , HSPD1, IL16, KDR, LGALS1, LYST, MPP1, <u>NEDD9</u> , NUP85, <u>PDE4B</u> , PRNP, RGS1, SERPINB1, SERPINE1, <u>SLPI</u> , SOCS3, SPP1, <u>TAC1</u> , TIAM1                                                                                                                                                                                                  | 28 |
| Cell survival                          | 4.15E-10 | -1.183  | ADK, ANTXR2, AURKB, BAMBI, BIRC5, BMP2, BRD2, BTK, CASP7, CCL4, CCL5, CCNA2, <u>CCND1</u> , CD2AP, CD40, CD82, CDK1, <u>CDKN1A</u> , CEACAM1, CEBPD, CISH, <u>CLDN4</u> , CLK2, COPB2, <u>CXCR4</u> , <u>CXCR7</u> , CYBB, DICER1, DUSP5, EIF2AK3, EMILIN2, FCER1A, FH, FOS, GADD45A, GADD45B, GALNT3, GCLC, GMFG, GZMB, HERPUD1, HHEX, HMGA1, HSP90AB1,                                                                                                      | 98 |

|                                        |          |        |                                                                                                                                                                                                                                                                                                                                                                                                                                                                                                                                                                                                                    |    |
|----------------------------------------|----------|--------|--------------------------------------------------------------------------------------------------------------------------------------------------------------------------------------------------------------------------------------------------------------------------------------------------------------------------------------------------------------------------------------------------------------------------------------------------------------------------------------------------------------------------------------------------------------------------------------------------------------------|----|
|                                        |          |        | HSPA5, HSPB1, HSPD1, <u>ID2</u> , IL2RG, ITGA5, JAG1, <u>JUND</u> , <u>KDR</u> , MED, MIF, MYBL2, MYC, NAD+, NDRG1, NDUFAF4, NEDD9, NFIL3, NGFRAP1, NR4A1, OGT, P4HB, PIK3R1, PIN1, PITX3, PKM, PLAGL1, PLK2, PPM1M, PRNP, PSMC5, PTGS2, RB1, RRM2, SEMA4D, SERPINB2, SERPINE1, SGPP1, SIRPA, SLC2A1, SLPI, SNRPA1, SOCS2, SOCS3, <u>SOD1</u> , SPP1, SQSTM1, STAT4, TGM2, TNFAIP3, TNFRSF13B, TP53, XBP1, XRCC2                                                                                                                                                                                                   |    |
| <b>Lymph nodes cDCs</b>                |          |        |                                                                                                                                                                                                                                                                                                                                                                                                                                                                                                                                                                                                                    |    |
| Inflammatory response                  | 2.24E-06 | -2.049 | ABCF1, ADA, ALOX5AP, AMICA1, ANGPT1, CALCA, CD200, CD97, CXCL10, CXCL5, CXCR4, FCGR2B, FGF2, FLOT1, GNAS, <u>GSN</u> , HCK, HSPD1, IDO1, <u>IL1B</u> , IL4R, <u>IL8</u> , <u>KLF4</u> , LGALS1, LYST, MAP2K1, MAPK14, MYD88, NEDD9, NMI, NUPR1, PDE4B, PLA2G2A, PON2, PPARG, PTGS2, RIPK3, S100A4, S1PR3, SBNO2, SERPINB1, SERPINE1, SGMS1, STAT4, TGM2, VEGFA                                                                                                                                                                                                                                                     | 46 |
| Chemotaxis of leucocytes               | 5.51E-06 | -2.165 | AMICA1, ANGPT1, CALCA, CXCL10, CXCL5, CXCR4, FLOT1, GNAS, <u>GSN</u> , HCK, HSPD1, <u>IL1B</u> , IL4R, <u>IL8</u> , LGALS1, LYST, MAPK14, MYD88, NEDD9, PDE4B, PON2, PPARG, S100A4, S1PR3, SERPINB1, SERPINE1, VEGFA                                                                                                                                                                                                                                                                                                                                                                                               | 27 |
| Shock response                         | 1.92E-06 | -2.55  | CALCA, CEACAM8, CLIC4, ENPP2, FAS, GUCY1B3, HCK, <u>IL1B</u> , IRF4, MYD88, PDE4B, PDE4D, PRDX2, PTGS2, S1PR3, SERPINE1, TGM2                                                                                                                                                                                                                                                                                                                                                                                                                                                                                      | 17 |
| Immune response of cells               | 3.23E-04 | -0.832 | CD200, CNN2, CXCL10, FAS, FCGR2B, <u>GSN</u> , HCK, IRF2, IRF8, MAPK14, MERTK, MRC1, MYC, MYD88, PPARG, PRDM1, PXN, SERPINE1, TCIRG1, TGM2                                                                                                                                                                                                                                                                                                                                                                                                                                                                         | 20 |
| Binding of lipids                      | 2.24E-04 | 2.23   | ANXA2, DNAJB1, FAS, <u>FKBP4</u> , <u>FKBP5</u> , HSP90AB1, <u>IL8</u> , PTGES3, STIP1                                                                                                                                                                                                                                                                                                                                                                                                                                                                                                                             | 9  |
| Activation of antigen presenting cells | 5.07E-07 | -0.442 | ANGPT1, CD200, CTSH, CXCL10, FAS, HCK, HSPD1, <u>IL1B</u> , IL4R, <u>IL8</u> , IRF4, <u>KLF4</u> , <u>LRP1</u> , MAP2K1, MERTK, MYD88, PLA2G2A, PSMB9, PTGS2, SBNO2, STAT4, VEGFA                                                                                                                                                                                                                                                                                                                                                                                                                                  | 22 |
| Cell survival                          | 2.73E-09 | -0.448 | ABCG2, ACVR2B, ANGPT1, ANTXR2, AQP3, ASAH1, <u>BAMBI</u> , BANF1, BCAP31, BHLHE40, CCNI, CD3E, CEBPD, CLDN4, CLK2, CTSB, CXCL10, CXCR4, DUSP5, EGR3, EIF4E, ERBB3, EZR, FAS, FGF2, <u>FKBP5</u> , HCK, HDAC1, HERPUD1, HMGN1, HSP90AB1, HSPB1, HSPD1, <u>ID4</u> , <u>IGF2</u> , <u>IL1B</u> , IL27, IL2RG, IL4R, <u>IL8</u> , JAG1, <u>KLF5</u> , LMNA, LRP1, MAP2K1, MAPK14, MTA3, MYC, MYD88, NDRG1, NEDD9, NGFRAP1, NR4A1, NUPR1, PARP14, PLA2G2A, PPARG, PPP1CC, PPP1R16B, PPP3CA, PSMC4, PTGS2, RIPK1, S100A4, S1PR3, SEMA4D, SERPINE1, SLC2A1, SPARC, STAT2, STAT4, TCF7, TGM2, TYK2, UNG, VEGFA, XDH, XPO1 | 78 |
| Killing of cells                       | 6.58E-05 | 1.723  | ADM, <u>CALCA</u> , CTSD, CXCL10, FAS, <u>FGF2</u> , LGALS1, MAPK14, MGEA5, MYD88, <u>NR4A1</u> , PLA2G2A, PPARG, SLAMF1, SLAMF7                                                                                                                                                                                                                                                                                                                                                                                                                                                                                   | 15 |
| Inhibition of virus                    | 4.97E-04 | 1.075  | BST2, EIF2AK2, IL27, <u>PTMA</u> , RNASE4, TRIM5                                                                                                                                                                                                                                                                                                                                                                                                                                                                                                                                                                   | 6  |
| <b>Spleen cDCs</b>                     |          |        |                                                                                                                                                                                                                                                                                                                                                                                                                                                                                                                                                                                                                    |    |
| Cell survival                          | 7,53E-09 | -2.279 | BAMBI, BCL2L11, BMP7, CASP7, CCL5, CD19, CD22, CD3E, CD79A, CD82, CD9, CDKN2D, CSF1R, CXCL10, DUSP1, DUSP5, FCER1A, FLNA, GNB2L1, HSPB1, IGF2, IL18, IL27, <u>IL8</u> , <u>LCK</u> , MBP, MGMT, MX1, NR4A1, PARP14, SEMA4D, SOCS3, TCF7, TIE1, UNG, XDH, XPO1                                                                                                                                                                                                                                                                                                                                                      | 37 |
| Killing of cells                       | 9,44E-06 | 0.796  | BCL2L11, CASP7, CXCL10, <u>ETS1</u> , IGHG1, IL18, MBP, MGMT, NR4A1, SLAMF7                                                                                                                                                                                                                                                                                                                                                                                                                                                                                                                                        | 10 |
| Inhibition of virus                    | 3,61E-04 | 0.957  | <u>CCL5</u> , EIF2AK2, IL27, MX1                                                                                                                                                                                                                                                                                                                                                                                                                                                                                                                                                                                   | 4  |

<sup>1</sup>The downmodulated genes are underlined. The unmarked genes are upregulated.





**Table S8. Predicted upstream regulators modulated in DCs upon BTV infection**

| Upstream regulators | Z-score | p-Value  | Genes                                                                                                                                                                                                                                                        |
|---------------------|---------|----------|--------------------------------------------------------------------------------------------------------------------------------------------------------------------------------------------------------------------------------------------------------------|
| <b>Blood pDCs</b>   |         |          |                                                                                                                                                                                                                                                              |
| C5                  | 2,428   | 2,23E-07 | ATF3,C5AR1,CCL2,CCL4,IL8,ITGB1,NFKBIA,SOCS3,TNF,TNFAIP3                                                                                                                                                                                                      |
| CCL5                | 2,400   | 9,29E-05 | C5AR1,CCL2,CCL4,IFNG,IL8,TNF                                                                                                                                                                                                                                 |
| CCL13               | 2,610   | 4,92E-06 | CCL4,CD14,CTSB,CXCL10,IFNG,KLF4,TNF                                                                                                                                                                                                                          |
| CXCL2               | 0       | 3,20E-04 | CCL4,CXCL10,TNF                                                                                                                                                                                                                                              |
| CSF2                | 3,278   | 2,71E-07 | ALOX5AP,C5AR1,CCL2,CCL4,CCR7,CD14,CD83,CISH,CSF2RA,CTLA4,CXCL10,HSPH1,IFNG,IL8,NFKBIA,SOCS2,SOCS3,TNF                                                                                                                                                        |
| IFNG                | 3,278   | 2,71E-07 | ALOX5AP,C5AR1,CCL2,CCL4,CCR7,CD14,CD83,CISH,CSF2RA,CTLA4,CXCL10,HSPH1,IFNG,IL8,NFKBIA,SOCS2,SOCS3,TNF                                                                                                                                                        |
| IFNA                | 3,278   | 2,71E-07 | ALOX5AP,C5AR1,CCL2,CCL4,CCR7,CD14,CD83,CISH,CSF2RA,CTLA4,CXCL10,HSPH1,IFNG,IL8,NFKBIA,SOCS2,SOCS3,TNF                                                                                                                                                        |
| IFNB1               | 2,060   | 1,96E-10 | BHLHE40,CCL2,CCL4,CD14,CD83,CXCL10,EIF2AK2,IFNG,IL8,ISG15,MX1,RNASE4,RSAD2,STAT4,THBS1,TNF,VCL,XIST                                                                                                                                                          |
| IL1A                | 3,160   | 1,08E-09 | APP,CCL2,CCL4,CD83,CXCL10,FGFR1,GBP1,IL8,ITGB1,NFKBIA,PTX3,S100A12,S100A8,S100A9,TNF,TNFAIP3                                                                                                                                                                 |
| IL1B                | 5,018   | 6,39E-19 | AIF1,APP,ATF3,CCL2,CCL4,CCR7,CD14,CD83,CDKN1C,CEBPD,CISH,CTSB,CXCL10,DDIT4,DUSP5,ENPP2,F13A1,FCER2,GADD45B,GBP1,GCLC,HSPA1A/HSPA1B,HSPB1,IFNG,IL8,ISG15,ITGB1,MT2A,MX1,NFIL3,NFKBIA,PIGR,PTX3,RSAD2,S100A8,S100A9,SOCS2,SOCS3,STAT4,THBS1,TNF,TNFAIP3,UBE2L6 |
| IL3                 | 1,843   | 8,63E-07 | CCL2,CD14,CD83,CISH,CTLA4,EIF2AK2,FCER2,FGFR1,GADD45B,GZMB,IL8,PLCB2,SOCS3,STAT4,TNF                                                                                                                                                                         |
| IL6                 | 3,695   | 2,28E-11 | ANG,APP,ATF3,C5AR1,CCL2,CCL4,CCR7,CD14,CD83,CEBPD,CISH,CXCL10,GADD45B,GZMB,HLA-DRB1,IFNG,IL8,LTF,S100A9,SERPINA1,SOCS2,SOCS3,STAT4,THBS1,TNF,TNFRSF17,TRAF3                                                                                                  |
| IL12B               | 3,385   | 6,65E-13 | CEBPD,CXCL10,DUSP5,GZMB,IFNG,IL8,S100A8,S100A9,SELPLG,SOCS3,STAT4,TNF                                                                                                                                                                                        |
| IL15                | 2,326   | 1,63E-08 | BRK1,CCL2,CCL4,CD5,CD83,CISH,CXCR6,DUSP5,FYB,GZMB,IFNG,IL8,ITGB1,MX1,NFKBIA,SELPLG,SOCS2,TNF,TNFRSF17                                                                                                                                                        |
| IL17A               | 2,590   | 5,92E-05 | CCL2,CCL4,CEBPD,IFNG,IL8,ISG15,S100A8,SOCS3,TNF                                                                                                                                                                                                              |
| IL18                | 2,802   | 1,66E-07 | CCL2,CCL4,CCR7,CD83,CXCL10,GADD45B,GZMB,IFNG,IL12RB1,IL8,TNF                                                                                                                                                                                                 |

|                        |        |          |                                                                                                                                                                                                                                                                                                                                                         |
|------------------------|--------|----------|---------------------------------------------------------------------------------------------------------------------------------------------------------------------------------------------------------------------------------------------------------------------------------------------------------------------------------------------------------|
| IL23A                  | 2,140  | 2,77E-05 | CXCL10,IFNG,S100A8,S100A9,TNF                                                                                                                                                                                                                                                                                                                           |
| IL27                   | 2,373  | 1,43E-06 | CEBPD,CTLA4,CXCL10,GZMB,IFNG,MX1,SOCS3,TNF,TNFSF13B                                                                                                                                                                                                                                                                                                     |
| TGFB1                  | 0,812  | 2,35E-16 | AHNAK,ALOX5AP,ANXA2,APP,ASUN,BHLHE40,BIN1,CCL2,CCL4,CCR7,CD14,CD83,CDH1,CDKN1C,CRIP2,CTLA4,CTSB,CXCL10,CXCR6,DDIT4,F13A1,FXJD6,GADD45B,GBP1,GCLC,GNS,GZMB,HLA-DRB1,HSPA1A/HSPA1B,HSPB1,IFNG,IL8,ITGB1,KLF4,MEF2C,MS4A8B,MYOF,NFKBIA,NT5E,NUPR1,PLOD1,PTX3,RSAD2,S100A4,SERPINA1,SHISA5,SMAD6,SMC4,SNTB2,SOCS3,SPEG,SPRY1,THBS1,TNF,TNFAIP3,TNFSF13B,VCL |
| TNF                    | 3,157  | 7,83E-18 | ALOX5AP,APP,ATF3,BHLHE40,C5AR1,CCL2,CCL4,CCR7,CD14,CD4,CD5,CD83,CDC42,CEBPD,CFB,CHST2,CISH,CTLA4,CTSB,CXCL10,CXCR7,DUSP5,ENPP2,FCER2,FCGRT,FGFR1,FUT3,GADD45B,GBP1,GLS,HSPA1A/HSPA1B,IFNG,IL8,ISG15,ITGB1,KLF4,MT1A,MX1,NFKBIA,PIGR,PLA2G16,PRSS23,PTX3,RGS1,RGS2,RNASE4,S100A8,S100A9,SELPLG,SOCS3,STAT4,THBS1,TNF,TNFAIP3,TNFSF13B,TRAF3,UBE2H,VCL    |
| TNFSF10                | 2,425  | 1,74E-05 | CD14,EIF2AK2,IFNG,IL8,ISG15,TNF,TNFAIP3                                                                                                                                                                                                                                                                                                                 |
| TNFSF13                |        | 7,22E-03 | IGHA1,IGHE,IGHG1                                                                                                                                                                                                                                                                                                                                        |
| TNFSF12                | 2,843  | 1,07E-07 | CCL2,CSF2RA,CXCL10,IL8,NFKBIA,PTX3,S100A8,S100A9,TNF                                                                                                                                                                                                                                                                                                    |
| leukotriene D4         | 2,744  | 4,57E-08 | ATF3,CCL2,CCL4,IL8,KLF4,NDRG1,RGS2,TNF                                                                                                                                                                                                                                                                                                                  |
| prostaglandin E1       |        | 1,46E-02 | CD14,IFNG                                                                                                                                                                                                                                                                                                                                               |
| NOS2                   | 1,718  | 6,61E-06 | APP,CCL2,CCL4,CD14,COX7A1,IFNG,IGHG1,ISG15,NFKBIA,PIGR,TNF                                                                                                                                                                                                                                                                                              |
| <b>Lymph node pDCs</b> |        |          |                                                                                                                                                                                                                                                                                                                                                         |
| C5                     | -1,303 | 1,42E-02 | CCL4,CCL5,CCND1,CYBB,FCGR2B,SERPINE1,SOCS3,TNFAIP3                                                                                                                                                                                                                                                                                                      |
| CCL5                   | -0,705 | 0,000183 | CCL4,CCL5,CD40,CD97,FOS,HMGA1,SERPINB2,SOD1,SQLE                                                                                                                                                                                                                                                                                                        |
| CCL13                  | -1,231 | 3,93E-02 | CCL4,CCL5,KDR,KLF4,SDC4                                                                                                                                                                                                                                                                                                                                 |
| CXCL12                 | 0,280  | 6,21E-03 | CD82,CXCR4,CXCR6,FOS,HCLS1,JMJD1C,MSH6,NR4A1,PTGS2,SOCS3,TP53                                                                                                                                                                                                                                                                                           |
| CSF2                   | 2,852  | 1,57E-   | ADAM8,BIRC5,BSG,CCL4,CCNA2,CCND1,CCR7,CD40,CD83,CD97,CDC20,CDCA3,CDCA5,CDK1,CDKN1A,CEACAM1,CIITA,CISH,CTSC,CXCR4,CYBB,FCGR2B,FOS,HSPH1,ID2,IER3,IL16,IL32,IRF2,IRF5,LAMP2,MCM3,MYC,NCAPH,PRC1,PTGER4,PTGS2,RB1,RB                                                                                                                                       |

|       |        |          |                                                                                                                                                                                                                                                                                                                                                                                                                                                                                                             |
|-------|--------|----------|-------------------------------------------------------------------------------------------------------------------------------------------------------------------------------------------------------------------------------------------------------------------------------------------------------------------------------------------------------------------------------------------------------------------------------------------------------------------------------------------------------------|
|       |        | 17       | M3,RRM2,SKA1,SOCS2,SOCS3,TGM2,TP53,TPM4,TRIP13,UBE2C,XBP1                                                                                                                                                                                                                                                                                                                                                                                                                                                   |
| IFNG  | 2,406  | 3,50E-15 | ARG2,BTG1,CASP7,CCL4,CCL5,CCNA2,CCND1,CD2,CD40,CD83,CDKN1A,CEACAM1,CEBPD,CHST3,CIITA,CISH,CTSC,CTSH,CTSZ,CXCR4,CYBB,DDX5,DUSP5,EIF2AK2,FBP1,FCER2,FCGR2B,FOS,GFM1,GLUL,GZMB,HLA-B,HLA-C,HLA-DRB1,HMGCR,HSP90AB1,HSPB1,HSPD1,IER3,IFITM1,IFITM3,IL18BP,IL32,IRF2,IRF5,ITGA5,JAG1,KDR,KLF10,KLF4,KYNU,LDHA,MIF,MX2,MYC,NEDD9,NLRC5,NUP98,PHACTR1,PRNP,PSMB8,PTGS2,RB1,RTP4,RUNX2,SAMHD1,SDC4,SIRPA,SLC29A1,SLC2A1,SLPI,SNAP25,SOCS2,SOCS3,SP100,SPP1,SQLE,STAT4,STX11,TAC1,THEMIS2,TLR7,TP53,UBE2L6,WARS,XIST |
| IFNA2 | 2,309  | 1,26E-09 | BIRC5,CDKN1A,CEACAM1,CISH,EIF2AK2,GEM,GZMB,HLA-B,HLA-C,IFITM1,IFITM3,IRF5,LY6E,MT2A,MYC,SOCS2,SOCS3,SP100,STAT4,THEMIS2,TP53,UBE2L6,XAF1                                                                                                                                                                                                                                                                                                                                                                    |
| IFNB1 | 1,101  | 4,48E-04 | CCL4,CCL5,CD40,CD83,CDKN1A,DICER1,EIF2AK2,FOS,GZMH,HMGCR,IFITM1,MYC,PTGS2,SERPINE2,SQLE,STAT4,TLR7,XIST                                                                                                                                                                                                                                                                                                                                                                                                     |
| IL1A  | -1,704 | 4,19E-03 | CCL4,CCL5,CD40,CD83,FOS,IL32,ITGA5,LDHA,MYC,PTGS2,SERPINE1,SPP1,TAC1,TNFAIP3                                                                                                                                                                                                                                                                                                                                                                                                                                |
| IL1B  | -0,951 | 1,78E-11 | ADAM8,BMP2,BTG2,CCL4,CCL5,CCR7,CD40,CD82,CD83,CDKN1A,CEBPD,CISH,CTSZ,CXCR4,CYBB,DDX5,DUSP5,ERRF1,FCER2,FCGR2B,FOS,GADD45A,GADD45B,GCLC,GEM,HLA-B,HLA-C,HSPB1,IER3,IFRD1,IL16,IL32,ITGA5,KDR,KLF10,LDHA,MIF,MT2A,MYC,NCOA2,NFIL3,NR4A1,P4HB,PDE4B,PSMB8,PTGS2,RUNX2,SDC4,SERPINE2,SERPINE1,SLC2A1,SNAP25,SOCS2,SOCS3,SPP1,STAT4,TAC1,TGM2,TNFAIP3,UBE2L6                                                                                                                                                     |
| Il3   | -0,714 | 7,77E-03 | CDKN1A,CISH,FOS,MYC,NFIL3,TP53                                                                                                                                                                                                                                                                                                                                                                                                                                                                              |
| IL6   | -1,544 | 9,71E-10 | BIRC5,BTG2,CASP7,CCL4,CCNA2,CCND1,CCR7,CD40,CD83,CD97,CDK1,CDKN1A,CEBPD,CIITA,CISH,CTSC,CXCR4,FOS,GADD45A,GADD45B,GZMB,HLA-C,HLA-DRB1,HSPA5,IFITM3,KDR,MYC,NUCB2,PRNP,PSMB8,PTGER4,PTGS2,RB1,SERPINE1,SNAI1,SOCS2,SOCS3,SPP1,SRSF5,STAT4,TAC1,TGM2,WARS,XBP1                                                                                                                                                                                                                                                |
| IL12B | 0,056  | 6,47E-03 | CCL5,CEBPD,DUSP5,GZMB,SOCS3,STAT4                                                                                                                                                                                                                                                                                                                                                                                                                                                                           |
| IL15  | 1,002  | 1,70E-07 | BAMBI,BTG1,CCL4,CCL5,CD2,CD40,CD83,CEACAM1,CISH,CKS2,COPB2,CXCR4,CXCR6,DUSP11,DUSP5,GARS,GZMB,HNRNPA2B1,HSPE1,IFITM1,IL2RG,IL32,MIF,MYC,PA2G4,PDE4B,PSAP,PSMB8,SOCS2,SP100,XBP1                                                                                                                                                                                                                                                                                                                             |
| IL17  | 0      |          |                                                                                                                                                                                                                                                                                                                                                                                                                                                                                                             |
| IL18  | 0,174  | 1,79E-03 | BSG,CCL4,CCL5,CCR7,CD40,CD83,GADD45B,GZMB,IL18BP,IL32,PTGS2                                                                                                                                                                                                                                                                                                                                                                                                                                                 |
| IL23  | 0      |          |                                                                                                                                                                                                                                                                                                                                                                                                                                                                                                             |

|                        |        |          |                                                                                                                                                                                                                                                                                                                                                                                                                                                                                                                                                                                                                                               |
|------------------------|--------|----------|-----------------------------------------------------------------------------------------------------------------------------------------------------------------------------------------------------------------------------------------------------------------------------------------------------------------------------------------------------------------------------------------------------------------------------------------------------------------------------------------------------------------------------------------------------------------------------------------------------------------------------------------------|
| IL27                   | 2,184  | 3,17E-03 | CEBPD,CIITA,FOS,GZMB,HLA-B,HLA-C,MYC,PTGS2,SOCS3                                                                                                                                                                                                                                                                                                                                                                                                                                                                                                                                                                                              |
| TGFB1                  | -2,685 | 1,77E-15 | ABCF1,ACAA2,ACSL3,ADK,ASNS,BAMBI,BNIP3L,BSG,BTG1,CCL4,CCL5,CCNA2,CCND1,CCR7,CD40,CD83,CDK1,CDKN1A,CEACAM1,CHST3,CIITA,CLDN4,CLK2,CTSC,CTSH,CXCR4,CXCR6,CYBB,DDX5,FCER1A,FNDC3B,FOS,FOSL2,FXYP6,GADD45A,GADD45B,GARS,GCLC,GEM,GSN,GZMB,HLA-DRB1,HMGA1,HSPA5,HSPB1,ID2,IER3,IFRD1,ITGA5,JAG1,JUND,KDR,KLF10,KLF4,LDHA,LITAF,MSH6,MYBL2,MYC,MYL6,MYOF,NCF1,NCOA3,NEDD9,NR4A1,NUCB2,PA2G4,PDHB,PLAGL1,PLK2,PLOD1,PLXNC1,PSPH,PTGER4,PTGS2,RB1,RBM3,RGCC,RUNX2,RYBP,SAMHD1,SDC4,SELENBP1,SERPINB1,SERPINB2,SERPINE1,SERTAD1,SHISA5,SIRPA,SLC2A1,SLC2A3,SLC7A1,SNAI1,SOCS3,SPEG,SPP1,SRSF5,STK17A,STOML2,TGM2,TNFAIP3,TP53,TPM1,TUBA1A,XBP1,ZFP36L2 |
| TNF                    | -0,950 | 1,43E-12 | ADAM8,B4GALT1,BIRC5,BMP2,BTG1,BTG2,CASP7,CCL4,CCL5,CCND1,CCR7,CD40,CD82,CD83,CDC42EP5,CDKN1A,CEBPD,CIITA,CISH,CTSC,CTS2,CXCR4,CXCR7,CYBB,DDX5,DENND4A,DUSP5,EXOSC7,FCER2,FCGR2B,FOS,GADD45A,GADD45B,GOSR2,HERC1,HLA-B,HLA-C,HMGCR,HSP90AB1,HSPD1,IER3,IL16,IL18BP,IL32,IRF5,ITGA5,JAG1,JUND,KDR,KLF10,KLF4,KYNU,LDHA,LITAF,MAN1C1,MCM3,MIF,MT1A,MYC,MYL6,NCF1,NCOA2,NEDD9,NPM3,NR4A1,NUCB2,NUP98,P4HB,PDE4B,PLK2,PSMB8,PTGS2,RAB32,RGS1,RGS2,RRM2,RUNX2,SDC4,SERPINB1,SERPINB2,SERPINE1,SLC2A1,SLC7A1,SLPI,SOCS3,SOD1,SPP1,SQLE,SQSTM1,STAT4,TAC1,TGM2,TLR7,TNFAIP3,TP53,UCP2                                                                 |
| TNFSF10                | -0,077 | 8,12E-05 | BIRC5,CXCR4,EIF2AK2,FOS,HLA-C,IFITM1,PTGS2,SP100,TNFAIP3,TP53                                                                                                                                                                                                                                                                                                                                                                                                                                                                                                                                                                                 |
| TNFSF13B               | -1,188 | 4,28E-02 | CCL4,FCGR2B,MYC,TP53                                                                                                                                                                                                                                                                                                                                                                                                                                                                                                                                                                                                                          |
| TNFSF12                | 0      |          |                                                                                                                                                                                                                                                                                                                                                                                                                                                                                                                                                                                                                                               |
| leukotriene D4         | -2,543 | 1,35E-06 | BMP2,CCL4,FOSL2,GEM,KLF4,NDRG1,NEDD9,NR4A1,PTGS2,RGS2                                                                                                                                                                                                                                                                                                                                                                                                                                                                                                                                                                                         |
| prostaglandin E2       | -2,509 | 4,05E-09 | BIRC5,BTG1,CASP7,CCL4,CCL5,CCND1,CCR7,CD40,CD83,CEBPD,CHGA,CXCR4,FOS,FOSL2,GZMB,IL16,IL2RG,ITGA5,MYC,NFIL3,PTGER4,PTGS2,RGS2,RUNX2,SOCS2,SOCS3,UCP2                                                                                                                                                                                                                                                                                                                                                                                                                                                                                           |
| NOS2                   | 0      |          |                                                                                                                                                                                                                                                                                                                                                                                                                                                                                                                                                                                                                                               |
| <b>Lymph node cDCs</b> |        |          |                                                                                                                                                                                                                                                                                                                                                                                                                                                                                                                                                                                                                                               |
| C5                     | -2,404 | 3,19E-02 | FCGR2B,IL1B,IL27,IL8,SERPINE1,VEGFA                                                                                                                                                                                                                                                                                                                                                                                                                                                                                                                                                                                                           |
| CCL5                   | -2,219 | 1,82E-02 | CD97,IL1B,IL8,NAMPT,SQLE                                                                                                                                                                                                                                                                                                                                                                                                                                                                                                                                                                                                                      |
| CCL13                  | -0,394 | 1,31E-02 | CTSB,CXCL10,IL1B,KLF4,PPARG                                                                                                                                                                                                                                                                                                                                                                                                                                                                                                                                                                                                                   |

|        |        |          |                                                                                                                                                                                                                                                                                                                                                                                                                                                                              |
|--------|--------|----------|------------------------------------------------------------------------------------------------------------------------------------------------------------------------------------------------------------------------------------------------------------------------------------------------------------------------------------------------------------------------------------------------------------------------------------------------------------------------------|
| CXCL12 | 0      |          |                                                                                                                                                                                                                                                                                                                                                                                                                                                                              |
| CSF2   | -0,386 | 2,67E-05 | ADA,ALOX5AP,CD97,CXCL10,CXCR4,DOK2,EGR3,FAS,FCGR2B,HSPH1,IDO1,IL1B,IL8,IRF2,IRF4,LAMP2,LCP1,MRC1,MYC,PPARG,PTGS2,RBM3,TGM2                                                                                                                                                                                                                                                                                                                                                   |
| IFNG   | 2,692  | 3,41E-19 | ADM,ALOX5AP,ARG2,ARPP19,BIRC2,BST2,CALCA,CASP5,CD200,CEBPD,CLIC4,CTSB,CTSD,CTSH,CTSZ,CXCL10,CXCR4,CYB5A,DDX5,DUSP5,EBI3,EGR3,EIF2AK2,FAS,FCGR2B,FGF2,FGL2,FKBP5,GCHFR,HLA-A,HSP90AB1,HSPB1,HSPD1,IDO1,IGFBP4,IL1B,IL27,IL4R,IL8,IRF2,IRF4,IRF8,JAG1,KLF4,KYNU,MAP2K1,MAPK14,MRC1,MX2,MYC,MYD88,NAMPT,NEDD9,NLRC5,NMI,NUPR1,PHACTR1,PLA2G2A,PPARG,PRDM1,PRDX2,PSMB9,PTGS2,RIPK1,RTP4,S100A10,S1PR3,SERPINH1,SLAMF1,SLC2A1,SMAGP,SNAP25,SQLE,STAT2,STAT4,TRIM8,VEGFA,WARS,XIST |
| IFNA2  | 2,688  | 1,50E-03 | BST2,CXCL10,EIF2AK2,FAS,FGF2,HLA-A,IL1B,MT2A,MYC,STAT4,XAF1                                                                                                                                                                                                                                                                                                                                                                                                                  |
| IFNB1  | 3,286  | 1,72E-07 | BHLHE40,BST2,CXCL10,DKK3,EIF2AK2,FGF2,IDO1,IL1B,IL27,IL8,IP6K2,MYC,MYD88,NMI,PK4,PTGS2,RNASE4,SQLE,STAT2,STAT4,XIST                                                                                                                                                                                                                                                                                                                                                          |
| IL1A   | -1,448 | 2,70E-03 | BIRC2,CXCL10,CXCL5,FAS,FGF2,IL1B,IL8,MYC,PPARG,PTGS2,SERPINE1,SPARC                                                                                                                                                                                                                                                                                                                                                                                                          |
| IL1B   | -1,270 | 6,23E-12 | ABCG2,ADM,ANGPT1,BIRC2,BTG2,CALCA,CEBPD,CTSB,CTSZ,CXCL10,CXCL5,CXCR4,DDX5,DUSP5,EBI3,EIF4E,ENPP2,EPAS1,FAS,FCGR2B,FGF2,FKBP5,GCHFR,HSPB1,ID3,IGFBP4,IL1B,IL27,IL8,KIF15,LCP1,MAPK14,MT2A,MYC,NAMPT,NR4A1,PDE4B,PLA2G2A,PPARG,PSMB9,PTGS2,S100A10,SERPINE1,SLAMF1,SLC2A1,SNAP25,SPARC,STAT4,TGM2,UGDH,VEGFA                                                                                                                                                                   |
| IL3    | -2,622 | 6,43E-08 | ADA,BNIP3L,CD97,CITED2,DOK2,EGR3,EIF2AK2,FAS,FCGR2B,FOSL2,IL1B,IL8,MYC,PFKL,PLCB2,PSMC4,RBM3,RPL6,SLC2A1,STAT4,TIAL1,TYK2,VEGFA,YPEL3                                                                                                                                                                                                                                                                                                                                        |
| IL6    | -0,827 | 1,25E-07 | ABCC5,ABCG2,BST2,BTG2,CALCA,CD97,CEBPD,CE51,CXCL10,CXCL5,CXCR4,FAS,IDO1,IGF2,IGFBP4,IL8,IRF4,LCAT,MERTK,MYC,MYD88,NAMPT,PLA2G2A,PPARG,PSMB9,PTGS2,SERPINE1,SRSF5,STAT4,TGM2,TYK2,VEGFA,WARS                                                                                                                                                                                                                                                                                  |
| IL12B  | -0,388 | 2,45E-04 | CEBPD,CXCL10,DUSP5,IL1B,IL8,STAT2,STAT4                                                                                                                                                                                                                                                                                                                                                                                                                                      |
| IL15   | -0,569 | 7,49E-05 | AQP3,BAMBI,CD5,CXCR4,DUSP5,FAS,GAPDH,GNAS,HSPE1,ID4,IL2RG,IL8,MYC,MYD88,NAGA,PDE4B,PSMB9,PYGL,RAB8A,TCF7,TRIM5                                                                                                                                                                                                                                                                                                                                                               |
| IL17A  | -1,059 | 2,70E-02 | CEBPD,CXCL5,FAS,IL1B,IL8,JAG1,PTGS2,VEGFA                                                                                                                                                                                                                                                                                                                                                                                                                                    |
| IL18   | -0,363 | 2,69E-02 | CXCL10,FAS,IDO1,IL1B,IL8,PTGS2,VEGFA                                                                                                                                                                                                                                                                                                                                                                                                                                         |
| IL23   | 0      |          |                                                                                                                                                                                                                                                                                                                                                                                                                                                                              |
| IL27   | 1,457  | 7,43E-03 | CEBPD,CXCL10,HLA-A,IL1B,MYC,PTGS2,STAT2                                                                                                                                                                                                                                                                                                                                                                                                                                      |
| TGFB1  | -2,051 | 2,81E-15 | ABCF1,ABCG2,ACTN1,ADM,ALOX5AP,ANGPT1,ANXA2,BAMBI,BHLHE40,BNIP3L,CALCA,CITED2,CLDN4,CLIC4,CLK2,CNN2,CPQ,CSR2,CTSB,CTSD,CTSH,CXCL10,CXCR4,DDX5,DKK3,ECM1,EGR3,ESRP2,FAS,FGF2,FOSL2,GNAS,GSN,HEY1,HSPB1,ID3,ID4,IGF2,IGFBP4,IL1B,IL4R,IL8,JAG1,KLF4,LBR,LCAT,LSR,MAP2K1,MAPK14,MGEA5,MRC1,MYC,MYD88,NAMPT,NEDD9,NR4A1,NUPR1,PDE4D,PDLIM4,PLOD1,PPARG,PSPH,PTGS2,PXN,RAB9A,RBM3,RGCC,RYBP,S                                                                                      |

|                    |        |          |                                                                                                                                                                                                                                                                                                                                                                                                                                                              |
|--------------------|--------|----------|--------------------------------------------------------------------------------------------------------------------------------------------------------------------------------------------------------------------------------------------------------------------------------------------------------------------------------------------------------------------------------------------------------------------------------------------------------------|
|                    |        |          | 100A10,S100A4,S1PR3,SBNO2,SERPINB1,SERPINE1,SERPINH1,SHISA5,SLAMF1,SLC2A1,SLC7A1,SPARC,SPRY1,SRSF5,TGFBI,TGM2,UCK2,VEGFA,XDH                                                                                                                                                                                                                                                                                                                                 |
| TNF                | -1,338 | 5,63E-11 | ABCG2,ADM,ALOX5AP,ANGPT1,AQP3,BCKDHB,BHLHE40,BIRC2,BST2,BTG2,CALCA,CD5,CEBPD,CITED2,CLIC4,CST7,CTSB,CTSZ,CXCL10,CXCL5,CXCR4,DDX5,DENND4A,DGAT1,DUSP5,EBI3,ENPP2,FADS1,FAS,FCGR2B,FGF2,HDAC1,HMGN3,HSP90AB1,HSPD1,IDO1,IGF2,IGFBP4,IL1B,IL4R,IL8,IRF4,IRF8,JAG1,KLF4,KLF5,KYNU,LCAT,MAPK14,MYC,MYD88,NAMPT,NEDD9,NR4A1,PDE4B,PLA2G2A,PPARG,PRDM1,PSMB9,PTGS2,RIPK1,RNASE4,S1PR3,SDC2,SERPINB1,SERPINE1,SLC2A1,SLC7A1,SPARC,SQLI,STAT4,SUPT4H1,TGM2,TYK2,VEGFA |
| TNFSF10            | -0,555 | 2,84E-04 | ANGPT1,BIRC2,CXCR4,EIF2AK2,HLA-A,IL8,PTGS2,VEGFA                                                                                                                                                                                                                                                                                                                                                                                                             |
| TNFSF13B           | -1,406 | 2,99E-03 | FCGR2B,IL8,MYC,NAMPT,PRDM1                                                                                                                                                                                                                                                                                                                                                                                                                                   |
| TNFSF12            | 0      |          |                                                                                                                                                                                                                                                                                                                                                                                                                                                              |
| leukotriene D4     | -2,559 | 9,47E-08 | EGR3,FOSL2,IL8,KCNJ2,KLF4,NDRG1,NEDD9,NR4A1,PKD4,PTGS2                                                                                                                                                                                                                                                                                                                                                                                                       |
| prostaglandin E2   | -2,436 | 5,55E-07 | ANGPT1,CEBPD,CST7,CXCL10,CXCR4,FAS,FOSL2,IDO1,IGFBP4,IL1B,IL27,IL2RG,IL8,IRF4,LMNA,MRC1,MYC,PPARG,PTGS2,VEGFA                                                                                                                                                                                                                                                                                                                                                |
| NOS2               | 0,32   | 0,0262   | CD3E,FAS,IL1B,PTGS2,SERPINH1,TCF7,TNNT3,TOR3A,VEGFA                                                                                                                                                                                                                                                                                                                                                                                                          |
| <b>Spleen cDCs</b> |        |          |                                                                                                                                                                                                                                                                                                                                                                                                                                                              |
| C5                 | -1,384 | 1,39E-03 | CCL5,CXCL2,IL27,IL8,SOCS3                                                                                                                                                                                                                                                                                                                                                                                                                                    |
| CCL5               | -2,173 | 0,000181 | CCL5,CXCL2,DUSP1,IL8,PPIF                                                                                                                                                                                                                                                                                                                                                                                                                                    |
| CCL13              | -1,481 | 8,72E-06 | CCL5,CXCL10,CXCL2,ETS1,KLF4,TIE1                                                                                                                                                                                                                                                                                                                                                                                                                             |
| Cxcl12             | -2,236 | 2,34E-07 | CCL5,CD69,CD9,RUNX2,VIM,ZBTB16                                                                                                                                                                                                                                                                                                                                                                                                                               |
| CSF2               | -1,043 | 2,33E-04 | BCL2L11,CD69,CSF1R,CXCL10,IDO1,IL1RN,IL8,IRF4,PPIF,SOCS3,TCF4                                                                                                                                                                                                                                                                                                                                                                                                |
| IFNG               | 1,705  | 5,03E-11 | BCL2L11,CASP7,CCL5,CSF1R,CXCL10,CXCL2,DUSP1,DUSP5,EIF2AK2,FGL2,FOSB,GNB2L1,HSPB1,IDO1,IGHG1,IL18,IL1RN,IL27,IL8,IRF4,ISG15,KLF4,MX1,MX2,NCALD,NOTCH3,RHOB,RTP4,RUNX2,SERPINH1,SMAGP,SOCS3,XIST                                                                                                                                                                                                                                                               |
| IFNA2              | 2,688  | 1,50E-03 | BST2,CXCL10,EIF2AK2,FAS,FGF2,HLA-A,IL1B,MT2A,MYC,STAT4,XAF1                                                                                                                                                                                                                                                                                                                                                                                                  |
| IFNB1              | 2,162  | 3,36E-06 | CCL5,CXCL10,CXCL2,EIF2AK2,GAS1,IDO1,IL27,IL8,ISG15,MX1,XIST                                                                                                                                                                                                                                                                                                                                                                                                  |
| IL1A               | -1,597 | 5,69E-03 | CCL5,CXCL10,CXCL2,IL18,IL1RN,IL8                                                                                                                                                                                                                                                                                                                                                                                                                             |
| IL1B               | -1,126 | 3,25E-08 | CCL5,CD82,CXCL10,CXCL2,DDIT4,DUSP1,DUSP5,FOSB,HERC5,HSPB1,ID3,IL18,IL1RN,IL27,IL8,ISG15,MT2A,MX1,NR4A1,RHOB,RUNX2,SOCS3,VIM                                                                                                                                                                                                                                                                                                                                  |
| IL3                | -2,251 | 3,40E-06 | BCL2L11,CD247,CD3D,CD3G,CD69,CSF1R,EIF2AK2,EMP3,FCER1A,IL8,PLCB2,SOCS3                                                                                                                                                                                                                                                                                                                                                                                       |
| IL6                | -1,502 | 6,24E-05 | BCL2L11,CASP7,CD79A,CDKN2D,CXCL10,CXCL2,DUSP1,IDO1,IGF2,IL1RN,IL8,IRF4,SOCS3,VIM                                                                                                                                                                                                                                                                                                                                                                             |
| IL12B              | -0,577 | 4,57E-06 | CCL5,CDKN2D,CXCL10,DUSP5,IL8,SOCS3                                                                                                                                                                                                                                                                                                                                                                                                                           |
| IL15               | -2,069 | 4,96E-06 | BAMBI,BCL2L11,CCL5,CD69,CXCL2,DUSP5,ETS1,GAPDH,HSPE1,IL8,LCK,MX1,TCF7                                                                                                                                                                                                                                                                                                                                                                                        |

|                  |        |          |                                                                                                                                                                                                                         |
|------------------|--------|----------|-------------------------------------------------------------------------------------------------------------------------------------------------------------------------------------------------------------------------|
| IL17A            | -0,782 | 7,87E-03 | CCL5,CXCL2,IL8,ISG15,SOCS3                                                                                                                                                                                              |
| IL18             | 0,303  | 6,70E-05 | BCL2L11,CCL5,CD69,CXCL10,IDO1,IL18,IL8                                                                                                                                                                                  |
| IL23             |        | 1,83E-02 | IL8,IRF4                                                                                                                                                                                                                |
| IL27             | 2,205  | 1,10E-03 | CXCL10,IL18,MX1,SOCS3,VIM                                                                                                                                                                                               |
| TGFB1            | -0,671 | 2,04E-10 | AHNAK,BAMBI,BCL2L11,CALD1,CCL5,CD69,CSF1R,CXCL10,CXCL2,DDIT4,DNAJB6,DUSP1,ETS1,FCER1A,FLNA,FOSB,GAS1,GNB2L1,HSPB1,ID3,IGF2,IL18,IL1RN,IL8,KLF4,MGMT,NOTCH3,NR4A1,PDLIM4,RGCC,RHOB,RUNX2,SCD,SERPINH1,SOCS3,SPEG,VIM,XDH |
| TNF              | 0,362  | 3,54E-09 | BCL2L11,CASP7,CCL5,CD247,CD69,CD82,CSF1R,CXCL10,CXCL2,DUSP1,DUSP5,ERG,ETS1,FOSB,HERC5,IDO1,IGF2,IL18,IL1RN,IL8,IRF4,ISG15,KLF4,MBP,MGMT,MX1,NR4A1,PLA2G16,PPIF,RUNX2,SCD,SLC27A5,SOCS3,TIE1,VIM                         |
| TNFSF10          | -0,152 | 2,98E-04 | BCL2L11,EIF2AK2,IL1RN,IL8,ISG15                                                                                                                                                                                         |
| TNFSF13          |        | 7,22E-03 | IGHA1,IGHE,IGHG1                                                                                                                                                                                                        |
| TNFSF12          | -0,711 | 2,65E-03 | CCL5,CXCL10,CXCL2,IL8                                                                                                                                                                                                   |
| leukotriene D4   | -2,183 | 3,56E-05 | CXCL2,DUSP1,IL8,KLF4,NR4A1                                                                                                                                                                                              |
| prostaglandin E2 | -0,714 | 3,91E-07 | CASP7,CCL5,CD69,CXCL10,ETS1,IDO1,IGHG1,IL27,IL8,IRF4,RUNX2,SOCS3                                                                                                                                                        |
| NOS2             | 2,135  | 1,09E-04 | CD3E,CXCL2,IGHG1,IL1RN,ISG15,LCK,SERPINH1,TCF7                                                                                                                                                                          |
